# Supplementary material for: CDK-regulated dimerization of M18BP1 on a Mis18 hexamer is necessary for CENP-A loading
Source: eLife. 2017 Jan 6;6:e23352. doi: 10.7554/eLife.23352 (PMC5245964; doi:10.7554/eLife.23352)
Supplement: Supplementary file 3. — DOI: http://dx.doi.org/10.7554/eLife.23352.020 [file elife-23352-supp3.xlsx]

## Sheet:  CENP-A-SNAP-SiR
Fluorescence intensity of CENP-A-SNAP-SiR	HeLa CENP-A-SNAP						HeLa CENP-A-SNAP + EGFP-M18BP1(1-1132)-P2AT2A-mCherry-Mis18alpha						HeLa CENP-A-SNAP + EGFP-M18BP1(1-140)-P2AT2A-mCherry-Mis18alpha						HeLa CENP-A-SNAP + EGFP-M18BP1(141-1132)-P2AT2A-mCherry-Mis18alpha						HeLa CENP-A-SNAP + EGFP-M18BP1(1-1132/T40D/S110E)-P2AT2A-mCherry-Mis18alpha						HeLa CENP-A-SNAP + EGFP-M18BP1(1-140/T40D/S110E)-P2AT2A-mCherry-Mis18alpha						HeLa CENP-A-SNAP + GST-EGFP-M18BP1(1-1132)-P2AT2A-mCherry-Mis18alpha						HeLa CENP-A-SNAP + GST-EGFP-M18BP1(141-1132)-P2AT2A-mCherry-Mis18alpha
	- siRNA			M18BP1 siRNA			- siRNA			M18BP1 siRNA			- siRNA			M18BP1 siRNA			- siRNA			M18BP1 siRNA			- siRNA			M18BP1 siRNA			- siRNA			M18BP1 siRNA			- siRNA			M18BP1 siRNA			- siRNA			M18BP1 siRNA
	Experiment 1	Experiment 2	Experiment 3	Experiment 1	Experiment 2	Experiment 3	Experiment 1	Experiment 2	Experiment 3	Experiment 1	Experiment 2	Experiment 3	Experiment 1	Experiment 2	Experiment 3	Experiment 1	Experiment 2	Experiment 3	Experiment 1	Experiment 2	Experiment 3	Experiment 1	Experiment 2	Experiment 3	Experiment 1	Experiment 2	Experiment 3	Experiment 1	Experiment 2	Experiment 3	Experiment 1	Experiment 2	Experiment 3	Experiment 1	Experiment 2	Experiment 3	Experiment 1	Experiment 2	Experiment 3	Experiment 1	Experiment 2	Experiment 3	Experiment 1	Experiment 2	Experiment 3	Experiment 1	Experiment 2	Experiment 3
	-97.0842	92.486	0.9235	3.7985	3.2526	-7.8916	46.2602	48.824	9.639	151.746	51.912	76.199	-3.7156	-2.5	17.1378	2.25	11.2462	-17.3342	78.9528	103.106	27.0293	19.7755	5.3393	-3.3865	60.0204	47.1837	-4.5574	0.7168	-7.4872	-24.8903	61.7385	43.273	133.763	-8.4247	-18.5077	-39.4911	-6.7615	126.049	59.6824	88.9094	11.463	54.6722	5.6046	8.4528	18.8546	10.4158	9.889	36.0166
	109.644	88.8112	15.6161	-16.5791	-0.699	-7.3814	42.1633	64.5727	-6.7232	33.5663	63.3801	5.7168	-27.9375	-4.8916	70.4362	35.4069	-2.5599	28.088	131.152	110.344	-21.0395	-45.6352	-15.2602	21.4809	66.6671	62.2551	0.9222	-17.7934	-9.4566	30.7921	26.9082	80.912	45.773	29.1033	62.1339	-8.8367	-27.5676	92.6505	87.9107	101.005	63.5395	125.694	63.5727	55.1173	59.4324	23.3571	-18.7462	12.662
	44.8163	104.269	67.5281	-46.7819	-1.5242	-12.0561	0.9681	138.893	91.148	23.0804	37.9222	39.963	5.3903	14.8622	-49.4592	-43.7066	-5.9349	42.9439	107.326	92.7628	32.2564	3.1199	-35.7423	6.1033	15.3227	113.605	1.4196	20.125	16.1913	-8.4617	39.1135	66.6633	61.8393	18.9375	-10.3814	7.7245	163.421	2.8469	38.9158	143.529	24.9426	127.856	70.4541	57.3571	1.1684	-28.4554	10.5765	-19.6301
	9.625	81.2156	-0.1888	-2.1964	-20.0497	5.3661	74.7793	227.468	155.242	136.597	68.3648	81.4656	-21.1314	-9.3724	-22.889	-26.6964	-1.0013	-4.9528	18.2589	56.148	1.0651	-12.6416	-11.1301	-37.5867	60.0778	75.7092	-6.3355	-39.8125	-29.0816	3.1964	231.635	2.1416	48.7653	56.2232	-9.3967	18.9069	-10.514	55.4809	111.33	94.9605	78.1849	105.291	72.9643	61.1237	47.0446	17.6901	-53.2577	0.5804
	79.5179	86.4094	35.3316	-0.6276	12.5702	25.4974	50.6518	124.946	78	89.3163	44.3087	115.39	-12.0676	-4.8571	16.6556	-25.0179	11.7219	43.9528	98.9031	54.2309	73.0663	10.8827	-64.9375	-12.3342	98.0038	51.4298	-46.7934	10.8686	15.5281	-16.1467	67.352	19.9898	105.855	-45.5166	-22.2615	26.7245	98.1416	42.4018	75.2003	86.3202	142.703	99.6926	84.7309	40.537	6.963	3.0472	-5.7092	4.3941
	59.1084	100.251	156.986	-34.3061	-18.8673	-13.273	86.6633	52.7857	-122.464	-81.8112	69.2691		-11.9987	-43.7653	-32.4464	12.574	4.1786	2.9069	46.7781	90.3355	1.648	39.162	6.0918	-8.9324	78.3406	40.3788	34.1301	-0.7781	-21.6492	30.4707	199.793	49.8827	91.5778	-16.1339	0.1633	13.2321	106.449	142.356	55.3559	105.963	88.1454	87.6837	2.5867	2.0638	140.657	34.8967	58.4426	11.1237
	62.0319	39.0357	-3.0217	21.4643	-17.2628	25.9796	34.463	-69.1237	88.5855	27.477	-12.9809		-2.1327	-14.3316	78.7883	28.4452	-23.9043	36.6365	276.976	49.625	5.1684	-2.0957	-7.0612	-46.8839	75.2934	42.023	84.2232	3.1059	0.8546	20.7934	40.5791	14.7653	82.0599	6.9962	-5.4834	24.412	57.7908	81.6008	10.4184	101.486	1.6735	96.4872	146.356	111.4	30.1913	75.2679	25.9987	-23.2857
	86.6824	5.4298	24.2258	9.6008	47.7908	-10.8712	62	43.7462	195.144	152.022	85.6008	112.108	-81.0383	-6.0191	58.1518	-22.9898	3.736	0.5013	171.861	153.964	68.3801	47.0179	-25.3992	-4.4528	90.4362	54.4388	87.7768	-21.6135	10.5842	-9.9337	119.06	62.0281	-61.7066	26.3074	0.7015	42.5651	148.228	67.6314	98.477	111.731	158.918	147.736	77.9184	15.0306	98.139	-24.2666	16.1888	12.9796
	43.9758	99.7474	135.39	24.3278	6.0153	20.5179	55.0663	101.472	-21.0612	128.934	65.0548	213.764	-0.2028	30.9401	-22.7985	-21.8584	-1.4273	25.2041	76.0115	28.5128	44	7.3189	0.7679	-6.9171	80.1288	125.938	161.585	-3.7041	21.9362	5.5102	95.4196	117.45	25.9898	33.5638	-20.5166	16.2526	23.6607	55.4745	161.926	-79.6339	53.3202	71.2436	45.6926	67.5013	68.8482	-26.9082	-19.3724	1.6199
	116.775	127.031	107.807	6.6964	37.2028	37.8227	14.6339	318.287	124.639	42.1543	77.6352	146.469	-2.9962	37.9936	-6.6071	-19.074	13.1977	24.0077	50.7436	148.284	73.1875	-1.7602	-37.8712	4.4452	102.375	148.75	90.4464	24.6658	-4.0306	25.5918	52.801	36.1531	55.8393	13.3673	17.2436	29.5115	159.065	53.3597	217.565	-18.6276	45.2538	80.1033	8.7309	177.823	84.852	-8.0791	52.477	-35.301
	71.9107	79.4184	19.9566	22.3253	-58.7972	38.3469	62.7168	52.6633	161.659	120.999	47.2704	-3.5906	5.0115	10.5957	35.0306	-5.6926	3.9911	29.7117	83.2602	69.9566	36.1173	-8.0791	-8.5421	30.3839	77.4872	83.3559	140.87	-13.6773	4.7181	4.8852	121.629	46.0026	87.713	-32.2551	-28.7334	-82.9401	83.0026	101.763	56.8559	-21.2959	35.7921	111.444	88.4911	104.13	-20.7194	19.2321	22.5026	-9.3686
	65.0421	67.7806	41.7768	16.4987	15.6505	-7.4707	97.9439	105.166	16.4579	82.1467	41.1199	122.838	33.4362	7.3533	-35.6212	8.2168	12.8661	-9.8355	118.473	55.6467	14.6798	23.2003	38.5038	-11.8125	64.0969	61.801	82.4566	10.1301	17.2768	34.9184	30.5051	66.9069	43.6684	27.1926	-5.5255	30.7168	134.694	108.587	114.204	137.415	54.0829	151.852	67.3648	-36.5128	45.4337	14.6327	40.5816	-11.2551
	47.2181	41.236	79.8329	-0.2832	-4.9592	12.6135	60.926	114.967	136.404	164.191	9.6429	10.486	8.0587	14.6327	-14.4923	-12.9592	-10.8495	-7.8342	162.71	81.963	44.8214	31.6518	16.9413	-17.2245	60.4273	53.0867	21.6671	-1.1046	12.3214	-2.3469	-41.7997	57.4515	48.1173	-20.6314	-17.3992	19.0778	151.542	118.217	147.543	12.2704	79.8495	134.575	24.514	-7.3508	57.5982	2.6735	10.7321	2.2194
	158.394	-32.2806	179.394	-24.5599	14.2436	-33.0561	106.42	112.269	13.736	124.912	42.9974	-13.463	30.9337	78.3406	20.6811	10.7194	-5.4196	-1.3367	198.823	4.2372	42.6173	30.4235	35.2602	25.1173	-19.8151	37.7143	65.9707	11.7538	5.074	35.0829	120.815	54.4872	68.2296	-42.3099	0.4145	2.6747	38.0702	-10.4936	175.946	10.4515	73.4439	36.8151	110.222	28.9184	89.8151	12.0102	10.3253	-2.6237
	83.3342	101.139	165.594	19.4349	1.4821	-3.963	-101.989	137.338	12.6186	-8.5574	51.0599	65.4579	-22.5969	6.2997	-19.2946	-6.0472	5.0242	38.6097	76.2551	75.8125	72.5765	-11.0268		0.6607	90.7423	58.4094	50.3061	-15.6161	3.963	16.2934	157.188	53.4286	15.0561	7.8903	42.0128	18.3367	126.888	133.11	140.093	25.5497	24.1199	130.866	47.5523	-2.0778	95.227	4.1365	3.4681	15.2768
	126.091	-15.1378	26.1429	-0.8648	1.0599	16.6531	7.0638	68.787	127.76	-82.6684	49.1952	82.4949	-1.2015	-3.1429	-5.2781	-5.5906	-9.4503	8.3571	49.5574	9.7844	48.6722	3.2079		-17.8814	115.721	36.3138	-11.3406	-9.1237	-29.5446	-32.3367	103.746	31.537	111.57	22.7321	-18.0472	4.8827	212.514	101.513	100.69	75.7092	111.085	72.0944	84.5765	66.6403	64.2972	-29.1888	27.9515	-6.9923
	125.177	146.009	-9.2538	12.7666	28.838	8.648	245.163	25.8112	184.186	166.268	4.0191	11.8495	32.8431	-0.4579	-6.2844	-2.8393	24.7526	-4.4758	209.301	64.727	24.9082	-27.9082	-13.7857	15.5089	119.166	158.452	25.2793	-41.7143	-37.4171	5.7653	-16.7704	60.5893	98.5013	-7.5332	-37.5217	-20.6148	5.1824	70.0804	127.44	107.145	47.6467	126.174	26.9656	6.523	28.3214	-20.3163	-14.4209	2.5548
	80.0153	23.6352	302.144	-7.6569	23.7513	47.1633	71.2679	112.383	153.972	132.122	97.1594		11.7717	-12.1148	5.5969	14.0446	52.1722	43.7105	113.955	86.8801	18.2283	17.861	-7.3546	-9.6582	79.0561	88.6798	126.26	8.3954	28.3393	-12.9898	49.6301	117.31	155.639	35.4668	86.1645	26.1429	127.753	27.2462	50.8635	191.165	-31.8814	78.9439	63.2934	-44.8737	8.3074	13.9528	5.0446	45.2372
	-5.9885	83.0931	8.0587	-1.014	43.1327	11.074	111.717	200.329	105.337	91.0077	99.0753		-12.5727	-12.551	33.6671	16.949	-57.2959	5.0268	150.615	7.4413	31.7066	-7.5051	-16.6467	18.0906	99.111	5.1122	105.069	2.9094	5.8367	3.1378	88.1773	12.4987	63.6008	9.125	-12.9617	-7.6773	86.9758	100.925	39.1237	-0.4617	140.893	-0.8827	109.226	116.458	-8.2258	-26.3546	14.7385	22.8635
	118.23	-11.2666	101.088	-1.0319	9.3329	-17.7334	206.238	51.7156	217.778	144.249	146.736	49.1977	2.4464	-27.1543	-55.6441	-13.4962		-6.0408	121.172	46.8265	84.088	-17.0548	19.875	29.1901	-12.4847	16.264	77.9311	8.4069	7.9145	21.0855	110.753	60.9056	74.2143	-5.3214	15.4974	-49.7972	130.202	38.1875	72.5855	91.4247	159.685	61.0064	120.232	62.8967		27.5255	-11.9273	-17.2156
	210.075	89.6492	32.5472	-5.0421	2.1161	8.7755	135.649	47.0561	74.1645	-117.67	118.364	131.06	14.1594	10.4796	23.4464	-10.6735		-42.9107	105.369	75.7883	52.199	13.5906	28.9528	4.1059	50.8036	51.8355	18.6952	13.4783	-7.9834	14.8597	-101.552	112.201	17.9821		10.9962	-8.0383	18.3992	4.1186	80.9337	75.8444	55.5714	63.5242	113.491	65.9133		11.727	-15.8253	-4.0166
	64.7793	25.0485	-51.4247	20.9528	-30.2946	19.9579	185.964	-35.6237	113.188	138.77	53.9464	-5.6901	-4.9247	7.2577	12.9145	-3.0765	7.7334	-9.6097	54.7449	102.962	6.8278	15.5217	-33.3061	-1.8788	-78.3125	12.4987	107.557	-0.08801	0.1645	56.4082	121.264	72.2041	108.075		21.227	35.023	148.485	98.551	69.6429	-46.7309	75.2832	110.075	69.4247	94.6365	89.1263	-17.0255	31.3418	-16.3597
	71.7334	106.466	98.4043	-7.5855	12.287	-10.8699	-12.0115	93.764	33.3992	55.3036	-69.1467	17.0765	13.5332	-4.6849	3.1849	42.2385	-12.6952	-35.8163	-15.9324	114.009	42.4222	-1.2066	7.9962	30.1429	105.037	110.745	159.408	-13.6824	-4.2653	23.125	32.5982	26.5918	136.514	14.5944	14.4031	29.1964	57.0663	36.8852	0.7449	27.4043	115.959	67.7666	102.575	78.1722	83.9668	-6.9286	46.1492	34.6454
	82.7245	2.4987	4.7921	-3.1543	40.0957	8.3227	145.102	96.3648	123.301	1.7538		8.5791	0.398	-8.8495	24.4145	14.9184	-22.6378	-13.0179	206.751	77.9133	-3.0995	35.1645	-9.6888	42.824	104.946	124.263	117.941	-24.1735	12.4515	45.8508	92.2423	70.0077	-39.3508	-51.0242	-17.2819		-7.1173	14.375	62.5332	93.5651	71.0995	118.291	-0.4388	118.578	58.3265	-8.2819	6.2105	29.6276
	25.0753	-9.0153	225.495	20.8941	29.9668	14.8304	49.4426	67.5408	22.4439	41.5344		103.01	-5.5128	19.4056	29.8023	16.037	68.2232	7.3125	80.3559	40.6161	34.5829	35.1773	17.2411	4.1773	3.7028	128.55	86.7972	24.1684	-10.301	-11.2781	114.936	-44.4158		26.1594	-3.3878		8.1837	45.4745	101.659	-10.5115	69.162	85.4235	182.139	30.1161	10.5995	-36.2245	36.3048	6.5982
	52.4617	86.2551		11.1671	-4.9605	20.9528	10.5268	108.775	21.2156	78.9464	143.983	-172.957	10.0204	0.7895	-1.6454	-28.5472	-4.7934	-9.7589	63.4605	63.7985	64.8138	25.7117	17.9579	-14.8291	89.6531	81.4439	102.661	-54.1645	0.8061	-3.0536	32.6543	-21.9145		10.1505	44.1607	-16.514		93.2793	90.3048	39.6378	52.5791	135.44	56.787	80.0319	3.199	6.1888	39.764	12.6365
	24.2793	13.5548		17.8112	21.301	-29.9707	136.175	73.7347	167.388	88.162	142.536	121.756	17.3112	13.7079	-9.2793	-27.7857	4.3316	-12.5765	-34.9758	64.9974	41.8546	17.9324	10.1952	1.3597	50.8712	81.1416	68.8686	15.1301	5.0459	33.111	40.3788	39.5089	40.611	-45.6186	-44.9949	100.128		17.0523	142.587	61.9719	93.6314	64.8431	61.6237	37.889	84.514	12.9222	33.1582	-1.3291
	67.6645	9.4643	0.8763	13.9031	-8.0255	-4.0332	105.675	113.114	133.811	74.8546	87.8482	103.093	6.6849	18.7321	-49.8291	-42.1327	3.1594	15.1837	213.121	89.9439		-6.7538	-19.1352	-5.8151	38.5408	101.181		-1.4643	1.0612	-5.4171	94.4872	-13.9643	95.25	42.5204	-7.9694	19.4311	81.9298	73.9987	112.241	-17.4324	97.9273	125.031	75.9936	132.736	54.0548	42.6314	8.8699
	77.4311	114.475	1.0867	17.9885	0.4311	19.0778	136.274	187.066	77.014	141.024	61.5561	0.2704	-10.6263	13.9515	-22.4974	-27.5357	22.5281	-21.2436	117.899	59.1837		9.8189	-26.4209	5.6888	86.3622	124.25		-20.5153	-21.1429	16.9643	80.2589	7.9732	-4.8036	-5.5306	32.2232	13.4235	16.8342	50.0791	97.4222	171.142	168.58	69.5561	47.5804	75.7577	1.4184	20.8699	-15.9694
	124.128	101.916	0.7054	-28.5536	-20.3699	32.3801	-157.679	94.5038	117.371	83.0306	100.027	3.8291	1.7883	14.9617	-2.2168	1.7781	1.7398	-5.0395	135.527	63.9056	61.6709	28.1352	15.1454	-0.1875	112.597	103.739	34.1161	-0.8048	12.3916	-24.7666	62.9235	21.0612	62.0497	-37.5689	-7.0944	6.8214	63.6505	48.3954	60.6735	90.7411	140.906	112.82	81.8265	75.6199	15.7334	35.1518	27.0434	-37.3176
	-5.2526	67.2908	14.8253	-0.6224	5.449	7.2066	-4.6901	111.966	-10.8814	104.459	80.6952	100.393	-14.0064	6.662	39.9184	-15.1901	-6.4796	-12.1378	93.1505	53.1849	79.4617	-23.6722	2.9923	-6.1786	138.659	57.875	-14.1327	-7.7449	16.8967	27.4719	63.0651	70.5893	20.5599	-43.7551	-2.6952	36.1403	10.6378	118.659	75.5676	-98.6454	48.0217	139.047	84.8393	32.4464	98.3699	14.5995	40.5153	22.6556
	118.51	125.424	1.4107	-14.1849	-5.4528	7.2296	0.8763		-3.3189	52.6046	-82.8023	67.4758	-26.7347	3.6901	11.8673	-40.1505	19.6033	-30.3878	145.643	68.2041	27.3061	-46.2972	2.6926	25.9719	2.2296	24.9885	46.5702	-6.4145	-21.5523	1.8342	34.0804	43.1645	92.977	-14.9923		-7.736	60.1556	106.209	21.5855		66.8724	122.038	92.6492	116.663	54.449	-44.4898	-3.5791	12.5115
	85.5217	2.1148	1.9681	-49.537	0.03954	35.6926	314.342			162.622	111.552	59.9656	-26.2334	32.4923	-35.5791	-42.912	10.0918	6.6658	-5.6594	53.648	58.7551	1.5	-6.4298	10.7538	65.8878	19.4311	12.0204	-13.5408	5.1212	23.7704	87.8584	35.551	45.588	-45.0574		17.6276	111.333	82.3138	88.9273		84.2283	99.1888	128.35	111.071	-3.0714	-3.8189		-3.0281
	104.117	92.7309	-7.662	-34.6747	-18.1199	-39.6416	138.626	102.17		54.9031	3.1224	24.2309	8.8214	-35.5906	8.1531	-7.7972	-51.463	28.2666		38.5957	77.2436	-5.9656	28.2168		17.2181	122.167	37.7462	20.125	-0.3865	1.8763	60.0842	27.4145	66.2691	25.3418	30.4349	4.8444	92.5153	80.5893	28.7462	-45.9401	85.7691	116.903	83.3291	12.9413	-0.4171	42.9171		-3.7985
	265.318	83.3202	107.332	24.7194	0.5064	1.8138	108.353	126.688	63.0638		162.212	8.5383	-23.2538	-3.6569	22.0204	23.0982	12.352	1.6046		89.0459	20.8112	15.4643	12.8265		14.4554	82.7423	75.6122	-28.7793	19.3546	-13.3176	38.5816	11.9337	19.7844	6.8724	5.9311	-35.25	27.4923	24.0778	120.088	17.1645	143.983	114.366	40.2857	46.3163	1.9605	28.361	-23.3278	25.2436
	31.2474	105.821	5.449	30.3559	-3.2232	-24.3342	52.6046	67.3852	-1.7602		261.057	32.4681	-28.5128		25.3878	17.352	33.5115	34.8214	-5.5319	14.3087	7.5497	12.449	-3.9273	-5.949	39.7564	111.006	21.1186	-20.0651	-16.8559	-24.2844	109.857	13.6901	54.7015	-8.3418	-25.5383	51.1939	112.375	34.6582	-3.2946	194.089	84.8138	116.931	46.2015	55.0446		21.3546	11.9885	-41.5446
	94.0918	78.6365	-9.6033	-13.6837	14.1645	-5.9337	46.537	51.7844	141.619	217.486	117.661	50.6084	3.4286		-12.2985	-26.0638	26.1888	-10.7411	-5.1939	-34.6505	72.0918	4.5791		-96.1008	79.5459	83.1454	64.426	25.7704	6.2156	-5.1033	58.7041		2.537	36.1224	-19.8482	17.9605	156.94	71.9031	150.781	226.131	61.3559	142.916	43.9681	113.142		11.3457	11.0421	-95.0459
	76.6148	14.324	2.3571	26.611	-42.1556	17.4337	109.552	69.0472	-19.9554	102.809	-136.45	91.5957	4.9719	-2.1569	-5.838	16.5753	-12.2474	-3.4885	9.9681	36.2334	99.4656	9.4107		-80.9643	59.9056	131.835	23.1556	-0.9107	-12.3686	38.463	131.417		-1.4171	-69.1224	2.4184	24.3355	80.7283	28.1276	8.5778	135.61	68.1046	132.716	102.853	18.301	48.125		29.9923	-7.2487
	119.239	-8.0038	48.375	-8.6709	-2.8814	14.1901	43.736	172.637	101.209	56.486	29.8903	77.8788	22.5077	-18.6467	-48.787	7.6378	12.2564	-16.2232	-6.0842	46.3367	57.1798	5.8508	20.5957	33.0753	58.4043	63.4566	86.0829	9.9554	15.4375		52.5689	5.713	-5.9133	-63.4554	18.5599	-111.093	167.173	76.7564		30.2666	102.468	83.1543	48.6773	45.0051	14.5536		5.6709	-41.5217
	35.4974	63.7946	129.467	2.6607	-3.8112	37.727	84.7946	-3.963	51.1786	9.9617	80.2691	30.9707	-13.3865	5.3112	-15.3125	17.4031	-42.2487	5.9375	35.6837	52.9184	54.2092	28.9247	5.1378	16.4949	122.409	43.4719	87.3393	4.1709	-34.1135		92.1492	41.963	58.4936	-3.2105	-4.3367	27.2781	71.7526			45.1722	38.0931	104.006	118.131	148.041	155.312	34.5268	-5.3036	12.4643
	59.9554		8.6084	-5.6416	33.8546	-14.1696	104.796	18.5013	48.1122	74.2857	-5.7602	70.3393	-34.199	3.2615	14.3788	37.5242	16.1224	12.2717	32.1403	-23.75	77.9834	-20.0089	-49.8125	17.8329	-2.5867	32.301	97.8954	-10.4732	1.648	-98.4082		130.15	48.0957		16.5612	10.5676	20.477		12.2959	118.491	74.0765		65.4158	84.1097	45.0217	-13.0587	-1.1097	40.6454
	167.319		13.4681	3.1008	5.5548	28.6518	84.3138	75.8788	75.4324	58.5217	109.111	106.791	-4.9758	41.6607	-0.5472	18.4885	-3.4298	-5.4222	77.2207	-2.9413	59.6237	-24.0689	-30.5319	-10.2717	75.9503	26.6824	77.2219	16.6173	5.8852	24.2054		77.1212	66.8304		-8.5689	13.111	27.0013	126.945	76.1059	64.1276	32.8202		23.7194	99.6339	49.2207	31.1327	-12.8163	-47.8125
	131.203	27.7054	14.6416	-30.3202	20.1709	18.2398	-20.9477	59.5918	14.7921	97.9222	142.749	84.8508	14.4898	-4.6518	5.6301	0.08673	12.1722	5.0395	-10.7832	21.537	72.2526	-26.8559	12.7092	2.0268	81.4464	123.066	41.9872	-8.463	6.7462	7.1888	8.139	81.7334	64.8559	-9.3138	52.9401	23.3814	28.0217	22.5102	73.3954	75.0727		-4.449	53.6199	43.0179	28.9311	-14.2321	-5.3036	40.8954
	103.076	-0.4043	141.292	12.199	41.3482	-21.5255	-0.9681	64.4426	-4.6084	131.018	180.554	77.4145	-17.0115	-19.2015		-19.1505	21.1837	49.9758	-9.1518	17.8967	13.6046	-38.3533	3.1441	10.4936	152.422	-17.4349	36.9426	14.4018	-8.0638	-13.9184	-7.4834	98.5791	-47.1352	-38.9987	-28.4311	-6.1671	92.5357	90.9452	71.4286	24.9515		33.8686	70.6148	82.2283	28.2105	42.023	0.6352	-32.0523
	72.9898	0.2143	170.048	-3.1033	9.0651		4.9094	102.679	65.1926	7.162	147.228	10.7436	12.4171	-21.2092			17.3061		26.3406	12.764	22.8737	-11.727	-8.9579	14.8253	57.3724	81.1888	67.449	-12.9783		3.5727	49.8457	66.9809	56.5791	20.3788	11.0344	-18.1607	67.6492	105.847	53.9758	25.0969	-6.7015	121.576	123.134	75.3865	74.7079	-65.9809	-19.4834	-15.4349
	32.4962	132.333	4.3648	12.2653	-20.4643		1.3202	116.568	255.908	80.0931	49.2054		-37.5829	5.1378	-58.3967				52.0638	6.1671	44.5166	24.3176	-66.4133	1.6467	51.9286	8.4732	66.227	-30		15.2015	79.8546	27.7219	8.5013	-21.7819	-9.9885	3.7564	90.9579	109.829	107.519	27.3431	34.8878	65.1135	87.0778	-32.7653	89.1097	7.676	14.7526	30.9158
	98.2219	297.376	-5.7474	5.6837	2.0574	4.0867	-11.4566	63.8941	53.5587	60.8355	146.579		-14.6046	-7.0867	-43.1365	26.0918		-18.6556	13.9974	7.2921	65.5013	-3.2398	17.1352	17.588	59.213	73.5689	28.1212	20.0906	-30.5625	30.4592	47.5536	-45.8699	69.8827	-15.3814	24.9388	-19.0791	-4.4069	110.913	78.8737	94.7309	102.236	28.4732	70.6365	61.8839	69.2449	-3.963	22.7474	-58.9464
	45.1224	130.556	12.0561	2.5179	16.2105	-13.7972	0.6671	104.082	56.8954	65.6633	220.515	-20.5191	-4.023	14.2819	-77.7309	-17.8355	162.675	-21.4987	4.236	46.0077	37.8202	15.2844	28.8801	-10.2309	89.9949	120.876	64.8712	-26.1531	-39.8546	38.3138	69.6365	87.4464	26.9158	-4.898	64.5013	-45.4426	62.5026	35.9707	36.639	54.648	39.9056	92.2423	82.6148	80.8214	57.1059	57.7003	13.1939	9.1033
	85.3189	91.1301	155.242	-14.023	40.0204	2.264	2.2755	71.7806	-14.9668	58.5077	46.7538	147.459	23.3648	-23.8839	-69.6276	-39.2232	-15.6849	-18.3189	-11.8227	90.9056	44.1645	-10.4949	4.301	-38.7806	46.7972	119.203	28.0867	23.5714	14.3992	19.5332	144.959	20.3048	-24.398	-18.4171	-12.4541	4.4911		84.2513	132.003	167.512	28.0051	-21.2385	85.1607	46.4031	42.8941	27.9758	-22.7003	-6.4324
	12.0434	142.566	-11.4847	-8.8202	26.986	-31.2003	179.781	141.89	49.898	184.938	180.758	78.7946	-21.8278	18.4911	-1.0714	-3.1582	5.5638	21.1722	54.4872	8.5918	82.4923	38.5638	14.1416	-4.4656	128.1	-3.4324	105.366	12.4094	39.1875	18.3776	36.7283	27.1033	85.8393	-14.3367	-27.2296	22.3469		-151.065	25.7934	126.718	-11.5548	237.754	64.875	49.0421	38.9094	11.3151		-27.5472
		8.9324	117.463	-18.0804		-1.5485	139.512	85.074	42.3814	128.65	108.698	81.1901	-21.6888	13.0523	-42.9694	2.0421	-71.7092	27.0281	24.7105		-0.2041	25.8865	41.9171	-35.9745	50.7972	8.2934	15.7844	20.9987	-66.4298	60.949	2.1161	99.7245	32.5242	17.2934	42.5485	1.9235	26.4362	76.4987	1.3878	-4.4439	62.6378	93.5332	28.2411	84.7207	-7.1008	-9.6097		50.5472
		117.547	-2.9464	7.3929		-10.0982	149.977	29.8852	-4.1531	112.305	-8.8941	41.5281	22.7934	36.0166	-23.4643	-3.5816	18.3546	5.6518	40.5332		56.1339	9.2832	39.7768	-1.7462	109.04	-3.5612	51.2436	1.4758	25.9184	-39.5969	42.7117	86.7972	67.5651	-167.145	11.6901	7.8342	104.691	28.9349	5.2258	15.3967	19.398	87.2679	32.611	12.0548	84.648	-22.0217	9.6607	-29.9209
	3.3163	3.3929	-65.4324	-18.7653	-11.5179	-30.8916	52.5753	79.824	81.5804	52.6582	14.2538	119.038	17.6862	-15.2258	-14.8253	10.8329	-38.1747	15.727	46.9426	60.3712	70.1671	4.9452	4.6773	33.7921	18.4809		39.8622	-20.4005	13.8202	9.1722	30.9643	90.4528	58.0026	27.3801	13.4018		79.4184	50.1071	71.7666	56.7717	12.3648	125.749	77.9337	66.9503	37.6645	0.1722	0.2577	-2.0727
	101.472	51.8457	1357.79	3.2079	-9.5982	23.3673	162.976	-1.4745	67.2793	106.126		76.3202	1.6173	-9.7768	-21.764	24.2105	3.7755	6.7168	38.5306	26.824	126.366	19.5102	-5.4337	14.0204	33.4796		70.2258	-11.3801	14.5281	-8.0663	105.142	123.54	66.2028	34.0077	13.9337		97.2742	13.3495	119.29	57.176	87.1454	41.8469	60.1939	51.713	89.6939	36.6901	-45.6696	-27.7462
	133.213	147.42	8.5281	3.8929	-6.9426	3.4898	115.795	25.361	132.611	85.3916		-26.861	7.236	-13.1722	21.4145	22.6212	7.3202	-37.0944	47.7768	-21.0753	54.1327	-4.3163	21.875	7.2513	55.7054	28.0867	82.3151	16.0153	7.537	31.9515	-10.1773	4.5612	21.5855	24.8355	-6.3878	22.3469	68.2602	8.9834	80.5497	48.6684	66.5242	63.7666	103.676	92.0446	65.9031	43.8316	21.8903	23.4273
	117.931	148.413	-4.0434	7.3138	-28.0153	0.6696	99.0242	73.0612	-30.6811	114.01	1.9145	-8.9617	6.1824	-12.4834	-0.8112	34.6199	-10.023	8.8278	62.0472	152.585	105.351	25.8648	5.6735	11.8865	85.3648	19.6467	45.3865	-8.4503	-3.6556	39.4668	52.1148	110.287		-12.4719	-10.3367	-2.9018	96.6378	18.2819	119.745	65.7296	59.2781	67.861	49.0638	42.8559	-41.5714	-11.4133	11.9375	5.5383
	150.843	83.7832	6.6416	-0.9413	-8.1926	-25.338	296.735	77.2946	136.939	148.471	470.079	133.162	2.4477	29.9375	12.1224	-14.1543	28.9362	19.8954	43.5115	110.112		-25.1467	-5.9056	23.5446	108.755	22.0829	54.0434		39.3495	15.227	58.9503	174.358		53.6645	13.7398	-5.1964	51.4656	87.5281	217.195	31.9439	72.0497	65.5855	167.694	49.4273	37.0089	-37.7946	-20.9401	3.8763
	186.105	113.473	186.062	-5.8916	-4.1276	44.6212	126.212	2.9783	83.8776		114.565	129.955	4.9324	10.2194	18.4834	-8.5842	-46.6224	29.3903	93.0179	84.8712		11.7181	-7.8878	-3.2334	16.3112	111.902	-9.023		36.7653		13.2972	65.6913	31.0421	20.2347	18.6161	41.0472	24.2959	105.21	82.9133	41.4758	53.4337	49.4796	65.8597	78.4235		35.9464	24.2156	-31.1186
	106.709	273.603	6.2181	7.7844	7.4923	-6.8265	183.809	80.4732	71.3304		115.399	80.5306	-4.5804	34.8418	65.6696	-0.8724	-1.1097	-24.3559	30.5689	69.3622	55.4643	3.1071	8.6977	-25.6403	96.6224	148.645	86.3686	10.0995	-10.537		57.6403	27.9554	-60.6594	-50.0026	14.9923	13.5625	91.1467	89.0727	137.193	24.4362	38.8776	43.7997	77.5383	78.4349		17.4694	7.2258	45.9477
	83.3495	180.809	72.8712	-5.0459	16.4541	10.7717	63.0038	13.287	83.5064	123.185	173.601		-13.75	-50.949	-18.426	-4.5778	-30.7768	-31.6059	22.7691	82.1441	32.4643	57.0778		-19.7819	100.357	292.851	73.7564	-24.5421	32.7041	6.4005	39.4235	-1.4528	38.8967	26.4566	37.6224	-25.3227	42.3967	125.705	59.9656	53.4643	33.264	135.296	46.8329	88.9426	-9.4783		-26.6327	43.2207
	-2.6416	9.7666	92.8635	-0.139	-53.3112	-8.2105	71.7143	197.846	129.786	114.139	98.0931			7.0408	-30.9184	2.0804	21.0408	-1.0255	52.4566	62.8151	46.2551	31.4107			53.4974	26.7092	12.486	15.6773	-13.5051	31.8253	33.8673		11.2921	-11.5702	25.6837	-9.551	48.7207	45.8508	154.209	90.0893	86.9375	19.3431	48.1798	46.0753	148.983		-43.4209	73.2079
	101.08	166.863	-30.8444	18.574	1.3278	13.9107	202.13	-15.1429	97.9668	113.826	170.929	123.126		-20.301	66.5089	35.7041	-11.1212	-12.1633	37.4056	131.788	23.8878	-24.8967	14.5651			77.0523	49.8278	-10.3176	19.8763	-24.8023	29.7513		41.0293	15.2207	30.3929	27	86.7717	70.3431		112.07	97.8138	51.1429	98.4324	85.3342	-55.5931	-46.8444	-13.7895	6.8418
	108.537	149.772	-33.4082	-6.7334	-39.852	-29.2704	123.438	49.9005	128.665	82.6824	205.385	19.5676	8.764	8.4809	15.3788	-7.7615	23.8827	32.0395	61.9158	78.0829	51.875		45.5536	33.0918		146.844	64.0306	6.014	4.1441	-7.949	32.5957	-9.9337	69.412	10.1735	-3.2283	-26.1722	5.6926	76.6467		61.6135	-35.7398	129.353	51.824	44.2003	83.5638	-9.7411	17.8763	33.8048
	81.1288	11.5	230.387	4.0459	9.6964	-6.2806	124.496	66.2589	106.921	98.7321	47.3533	76.7781	3.8635	28.5038	7.9668	7.6531	-25.6212	-24.0051	59.9592	123.705	23.4094		18.3508	-0.5472	154.275	119.68		19.1977	8.0714	16.9847	61.9273	87.2168	49.3227	-39.3367	-22.602	5.3827	64.6569	60.1824	130.894	27.4936	28.1097	61.773	136.497	103.125	103.033	66.7449	-34.5944
	153.737	-221.321	155.562	-11.1416	-21.9145	12.9426	86.4617	47.8291	99.1008	95.7474	326.964	129.259	17.5638	-8.0166	22.8903	7.662	4.8546	1.4413	71.4936	70.7487	52.1582	-6.9783	11.6875	-3.7423	83.3061	112.273		-21.1492	-0.588	41.4247	75.5893	-25.0434	61.0536	-32.6467		25.023	81.0791	76.7691	72.5064	94.5753	35.4337	13.7423	26.9031	85.9056	63.3878	-15.3202	-8.6569
	77.3954	179.691	175.356	7.3393	3.6569	45.4617	125.634	44.1071	24.551	99.2003	158.5	74.9872	-2.5957	-50.5191	46.8457	-10.6556	14.6709	26.8418	38.2411	151.773	20.6071	-23.6645	9.2921	13.662	90.1798	194.11	74.2806	20.5281	-38.9464	-35.2411	29.6849	66.7487	34.4273	-40.1862		18.8571	75.5663	99.4911	99.4145	29.5	-13.0485	30.1403	51.5	24.0204	85.9617	-34.2997	-14.3508	8.9898
	61.861	160.098	19.9796		1.5191	-13.6492	202.605	74.9426	122.33	28.2755	169.916	119.885	44.0191	-1.8508	24.7143	50.5497	-13.1135	17.1084		65.551	117.82	-27.162	-13.574	-12.9464	151.48	96.2819	-12.6467	6.6161	9.2462	9.8278	37.1046	8.5702	-31.8903	-18.5395	0.2615	26.7309	84.3776	84.7117	43.4158	34.4719	55.3686	167.897	104.547		144.756	13.1696	12.1709	-56.9528
	226.573	115.221	95.6224		2.4426	-15.8865	16.8776	91.2028	29.7258	143.995	164.971	146.175	-16.6339	-31.0536	-19.8814	26.0969	36.8316	55.0536		32.5561	70.912	1.0038	9.8661	23.3533	56.7806	66.5128	-7.0689	2.7946	8.611	22.3661	48.5357	67.6569	45.6314	41.3469	45.5421	-11.0574	67.7245	90.2181	95.8418	18.1556	49.8316	78.5038	47.7615		22.1722	35.8546	7.5153	25.3457
	203.098	130.135	83.0574	12.537	7.0778	28.236	162.295	49.0867	69.6543	86.2768	133.562	149.009	26.5638	-71.0842	25.662	0.1122	51.9273	-18.5332	63.773	125.986	79.912	25.574	-9.3839	29.6722	79.5281	47.4898	57.1798	6.4554	23.898	-11.1161	56.0306	-20.3023	60.5026	24.6696	-17.7283	-35.3444	120.778	89.9375	82.2908	69.8622	27.9349	61.8992	44.8992	-11.7245	12.2092	49.2959	27.1314	-45.6301
	121.878		13.9617	6.8151	5.2041	-13.2895	83.1429	54.4413	121.495	147.935	162.681	8.801	37.6071	-0.9936	9.3622	21.9005	55.9069	11.2232	-27.4962	60.3776	37.2079	-99.8992	-5.5383	4.8508	117.81	132.662	63.3291	3.0153	13.1531	43.7972	65.4834	55.5242	51.9375	10.4018	43.9758	-21.5459	110.769	100.314	89.0867	13.4477	43.1097	57.7156	70.0255	9.0714	95.0102	-35.9452	-11.7207	11.5306
	96.8329			19.7258	19.3048	26.6097	22.1071	64.3571	178.278	115.065	242.112	12.9056	16.611	24.6658	9.6071	10.7028	-1.1722	-31.2449	71.2564	149.846	39.3559	9.463	21.5587	18.9656	86.4222	-47.6888	33.1569	-25.2691	-8.8571	42.8163	80.7628	73.3023	57.713	4.6339	22.2921	28.3801	106.003	50.4133	88.6327	-11.6276	36.8265	40.4911	89.8304	118.399	107.616	11.4821	18.1811	-57.0026
	-1.1008	52.8508		-9.1365	-27.1046	-16.2207	149.625	145.665	102.1	6.3482	215.749	103.889	-69.7704	-4.912	2.4324	18.4273	-44.1339	-2.4337	47.0179	-101.612	11.6543	-9.6594	-15.8202	33.4987	111.68	-17.8444	66.9388	4.6008	21.6173	-2.6926	13.787	8.7054	95.2347	35.5689	0.1365	-7.9464	66.2615	91.8163	58.4222			35.5102	59.648	86.1327	13.9809	36.662		51.0791
	131.275	125.259	8.0344	-24.9872	11.3214	1.2372	228.694	62.7564	20.8776	125.816	232.978	39.8788	13.1378		16.2679	14.7117		-59.9719	-33.1569	95.5727	31.1607	-5.5906	18.9133	35.2181	106.955	182.17	36.6862	5.0306	29.1773	9.4554	72.7513	-25.713	105.13	-25.6505	-33.3048	-8.4783	45.3112	84.3202	64.6939			92.412		174.616	24.6964	32.7334		36.6429
	46.4196	123.231	67.3597	22.0816	3.1862	-2.0944	174.194	85.6913	109.908	151.344	113.64	56.139	5.1709		5.4528	-4.6684		2.4043	12.9987	116.245	84.2704	-10.6952	-0.9834	21.764	135.001	149.709	28.6276	6.7513	2.7985	-11.3916	97.1735	50.0064	-1.361		5.9477	-49.4235	94.1658		135.805	153.133	139.844	70.5204		84.8929	83.6518	21.7577	21.4592	-61.9847
	76.6033	77.3878	86.4018	3.7143	-14.9796	10.3304	-3	102.55	14.5931	82.5038	-131.49	77.0625	36.8992	12.1875	-12.5319	1.9554	-15.2615	-21.9056	40.2283	56.4349	9.7538	-21.6212	-8.5676		154.726	139.897	31.9286	-4.2602	-18.8125	7.5293	36.9796	12.301	5.6735		-26.6046	-4.0548	58.7704		87.2997	77.2398	37.9656	52.8686	100.288	189.171	-6.3788	3.0778	-100.05	10.3048
	90.361	105.304	62.5561	-10.8112	21.1811	-50.301		58.0651	53.3444	97.176	125.319	228.31	29.5395	24.176	21.4617	25.4477	-2.9796	-17.0268	67.3393	103.941	65.639	-4.2449	-16.9656		113.098	100.862	63.5102	-4.949	27.0689	55.4298	-0.3495	77.0191	174.304	15.2895	-24.9413	-144.591	65.2054	130.023	84.514	60.6441	30.9094	55.1199	22.537	71.4719	13.0651	57.3878	36.4617	9.3495
	14.824	94.1148	18.8048	33.1607	4.9388	-11.0026		66.8482	75.3801	72.7704	-94.5561	-1.0395	5.1288	-32.6594	-4.9821	-5.6365	-18.9362	9.3406	34.8814	71.4247	-17.0064	11.8036	26.0166	27.0434	73.4528	123.578	84.2666	-16.5115	15.9987	-1.1952	93.6824	60.9758	15.0038	15.9809	-25.9439	22.5395	23.9694	164.426	111.463	80.3482	27.4987	64.6352	103.77	65.0472	17.6518	39.3227	-42.1684	11.1084
	170.312	73.2526	52.051	-11.4554	0.3253	-2.074	-0.7653	91.2666		-5.8214	334.008	-1.2168	30.5128	-17.898	22.7168	11.8074	13.5995	18.324	39.3406	93.7436	21.2526	-6.6122	3.0753	28.2946	15.389	85.9949	82.5485	-0.5995	-27.801	-6.2781	87.9056	24.125	82.8304	-28.7436	0.9528	31.1263		44.3827	122.395	76.3023	28.2347	-16.3469	51.764	6.4617	38.4834		37.3801	27.4515
	138.788	241	48.0026	-12.176	26.588	34.7334	105.703	47.037		62.9056	254.199	117.902	-2.4707	-13.9643	-32.6684	20.6467	16.2857	-30.2985	44.537	63	9.963	22.5625	-8.6862	-18.1097	93.9145	80.2079	26.1977	-6.8482	3.5268	19.2296	45.4732	28.1607	83.611	-48.6378	38.0893	0.04209		100.821	103.31	104.352	59.4579	117.344	88.3138	77.6862	180.107		-5.4605	8.8839
	187.505	43.6556	-16.3151	11.2819	12.6122	-15.5995	15.8151	107.566	2.4324	83.3482	165.352	131.874	32.0038	-17.7398	-3.7028	-22.8087	-58.4094	6.3023	45.8265	93.7793	80.4694	-24.6339	-20.2449	-12.3686	-0.1709	58.5497	-20.9987	-4.8941	7.6122	-4.7194	10.0587	35.1224	70.4452	39.4158	9.9605		5.3304	33.426	165.361	43.0867	41.7577	186.806	245	189.247	105.652	59.1722	-46.1084	-10.5982
	135.631	136.555	14.9375	-20.699	-7.3342	17.1709	85.8724	20.2577	132.874	105.341	166.462	120.867	16.1046	29.7602	33.9069	8.4056	16.7219	13.361	78.9222	106.999	23.4324	-19.5676	-14.3253	-20.111	117.809	242.976	107.839	-30.9337	-22.2883	17.7755	55.3941	53.5064	35.3673	27.1518	-0.463		6.0842	93.898	117.815	52.9566	86.0765	85.0931	106.884	112.051	105.957	30.2041	-7.3597	23.6658
	140.62	67.1518	83.0255	3.0204	-26.7513		88.7589	110.374	111.814	88.486	123.277	46.0816	-7.3967	29.5306	31.9911	54.7245	12.7577	-17.0217	74.0408	52.8954	30.273	-16.7092	14.2079	-95.8737	48.7487	108.165	40.0408	14.6505	13.514	18.2589	45.6531	34.5676	58.4809	29.6365	9.5574	36	64.5	94.2755	-6.6594	102.838	16.9541	137.666	132.512	132.607	112.181	33.1901	-29.1837	-21.4094
	108.375	227.429	49.7015	-23.4707			101.157	98.0574	160.773	199.385	108.617		9.3227	13.5599	-3.3329	-15.2054	10.9643	-5.1492	41.6875	78.8189	30.051	2.0191		35.1314	84.4566	221.466	55.5306	21.8418	12.4872	1.8571	64.4707	10.551	7.3508	35.8878	-55.4401	-14.5497	105.451	330.884	72.4987	13.1492	140.872	56.3304	58.1862	71.5408	29.1811	5.2258	36.2883	-1.6709
	94.5472	69.9337	10.4796	-24.0612		11.2207	-1.1518	59	-89.139	172.173			15.0816	11.0829	31.6135	4.7334	7.7232	49.2972	11.6059	10.6084	4.2704	17.5625		26.2742	27.5357	78.1747	63.3508	-24.648	14.7258	-2.8099	60.5089	26.2781	93.5931	-3.0906	-21.6173	10.7628	185.04	23.1084	103.912	94.6135	73.398	61.5778	70.4375	194.427	185.758	6.111	-1.6939	25.4605
	167.17	-4.2755	79.5765	27.3533	24.7092	-13.6084	142.438	27.3393	192.089	81.5115		144.738	-4.4082	-59.0638	30.2181	-1.1977	6.6237	-75.0906	37.5421	7.0166		66.2232	-14.9439	17.9401	68.1084	161.69	59.5293	8.1543	5.2181	11.2538	76.3673	94.4018	40.0421	0.9209	-10.6135	-48.7691	23.8099	90.2296	94.3265	50.3278	120.334	70.0676	58.676	44.9566	138.713	-0.6696	20.3304	18.8329
	42.0051	89.0102	85.2908	5.139	-18.4783	10.801	395.131		47.199	113.489	132.73	69.1798	2.1569	35.5702	-6.5281	21.0931	-16.4745	6.7105	25.8431	4.3469		21.6199	2.2321	13.3316	87.8227	19.3597	31.0982	-31.2577	-11.2334	-50.6492	57.949	52.4949	2.3278	-2.3176	3.4528	19.3967	205.418	110.239	177.01	62.6441	-21.5026	45.4196	132.148	115.385	23.4923	-9.4758	-27.639	-6.9464
	-75.2513	-11.477	59.0217	-22.838	-6.7487	-73.6645	173.366		75.852		48.7258	29.1939	19.361	29.3112	-30.8508	29.0727	22.2921	8.1008	105.857		43.4719	15.3827	5.0217	4.7245	70.4235	117.194	83.5255	-1.3967	32.8712	14.1505		5.3393	-20.7781	4.1518	-6.0816	24.3316	98.2181	160.654	115.881	97.5855	111.399	-54.3227	113.029	66.9324	5.1148	15.25	-11.2232	30.5115
	7.9834	143.449	66.1556	30.014	-34.6582	3.6862	89.8546	67.2041	155.96		64.0306	10.2334	12.0038	-11.1607	16.2602	21.5102	-5.2028	-20.1199	100.1		46.0816	10.5013	-13.8929	28.5931	114.621	237.575		36.6454		18.0765		74.1237	33.3482	-10.0842	3.6645	-1.4209	101.784	214.105	166.712	51.5319	85.287	-16.0765	36.2985	147.593	24.3061	34.2857	21.5332	-33.7589
	-0.0102	74.9158	-5.5128	6.1339	-5.4668	-23.0242	208.867	107.207	124.38	-5.9936	115.185	70.5523	9.2997	18.5842	26.5918	1.8839	-7.1276	48.4783	30.6224	60.9375	8.963	8.3776	11.9936	1.6084	87.8495	105.574		-2.5026		-5.1441	-23.4643	22.4464	39.9898	-47.3202	-12.9834	-19.0791	142.173	84.0051	72.0995	59.8355	79.1684		71.412	63.8355	-7.0013	-29.7334	-16.2895	45.0459
	101.922	131.997	15.3992	-8.4439	27.7015	51.7602	114.333	58.2793	27.3099	94.0689	73.3265	133.547	6.4554	-1.1518	33.6594	5.5421	16.8329	6.3342	4.6543	38.773	-5.1926	-19.4171	-46.963	14.2793	165.466	21.037	-3.736	-11.875	-23.3048	-16.8087	51.4401	95.8508	18.9349	5.3023	-26.1926	17.7347	65.8776	79.5344	16.4464	56.5791	93.787		77.1148	161.352		16.1339	-36.1811	2.9694
	167.841	120.592	65.9145	-14.1492	-25.3457	28.6084	148.602	43.9783	25.7908	44.9273	134.732	42.1352	-2.4834	-21.6084	-52.1913		-12.1735	45.9605	60.2181	29.0727	43.6837	5.5804	11.8929	25.6862	113.124	17.9503	25.1263	3.8788	-2.389	-34.7372	-1.4821	48.7551	7.5089	-26.1671	23.4885	1.7921	22.8048	60.449	64.3418	131.315	100.372	185.912	38.8087	85.1531		-9.2487	1.2844	-29.2181
	101.538	59.2934	106.663	8.9196	35.7628	-8.2628	218.497	-49.6122	6.0319	34.2054	28.5383	96.8992	-34.0918	6.1837	21.4885		-46.4656	-10.2997	47.0702	54.0434	15.2538	-9.227	13.3418	21.3763	103.677	64.4375	115.865	-11.5115	-8.1747	25.5421	6.2156	29.139	50.8929	24.7768	6.1429	10.0651	150.976	71.1416	134.703	39.0906	107.833	-6.5306	84.2704	89.9337	13.3801	-2.6518	5.5829	35.3304
	216.358	121.899	43.6658	5.5893	-30.3865	44.3023	153.931	66.5714	168.244	87.1709	-11.7168	109.783	19.4503	2.8929	-6.9834	-0.2092	11.5115	27.6505	85.1008	17.3227	10.0472	-1.1773	-5.7372	1.2538	92.1645	232.603	94.9375	4.2959	-20.8189	-10.486	68.6837	55.4171	22.5753	9.0255	-1.037	21.8967	140.518	87.699	177.895	96.6645	21.7066	122.152	126.925	98.7946	55.2653	15.5395	-5.5791	-8.3304
	167.823	172.156	109.812	16.6556	8.199	-10.1199	134.418	91.0115	44.1429	67.5064	117.58	18.2844	22.088	11.1441		-16.5587	15.023	1.0306	29.5536	11.125	50.6454	-3.699	-2.9337	2.3316	134.024	102.017	29.2168	34.486	20.5179	61.2832	-15.0217	-33.2066	40.0982	-88.2602	-2.9566	8.6977	-21.9656	101.949	113.858	3.7985	55.9413	91.0982	-14.9005	59.4605	56.7551	39.662	16.4298	-36.236
	113.953	121.682	105.389	-1.1122	-19.7704	29.5548	122.042	64.7704	117.195	-4.713	113.27	114.093	-8.088	34.7232		5.0753	39.1403	13.2207	87.5485	32.4503	9.2232	-30.7054	8.7551	-43.3431	127.111	117.554	30.102	13.824	5.9337	-14.0765	85.7474	8.8495		17.9286	-4.1416	29.8699	-21.5842	102.69		98.5689	106.189	210.468	78.3061	147.103	0.9872	23.3469	31.199	30.9821
	86.8508	126.596	112.301	10.5689	40.6276	8.3992	208.064	76.8763	235.76	96.9031	158.824	72.6352	8.3355	3.0115	10.2449	19.7487	59.986	12.0038	57.1441	-0.09056	22.9426	-11.4732	2.0612	17.9324	122.37	140.847	23.5893	-0.7908	29.1543	10.273	13.9758	7.3699		29.3444	0.1518	-2.5383	43.602	69.7105		50.0357	105.976	74.4719	135.14	154.207	40.8788	22.2385	17.852	53.7398
	141.98	101.116	34.8673	6.8546	-7.4834	0.8355	124.926	152.861	46.8941	44.7934	194.472	31.6097	14.5408	44.9962	-7.2921	-18.4783		-14.338	29.8559	49.0089	90.912	11.9783	21.1531	-11.0599	229.75		59.1977	-3.6033	25.1186	-0.3457	21.7117		58.1212		16.2908	-25.2742	32.0306	109.027	25.0077	117.304	29.4745	136.533	161.093	138.888	-41.1888	30.602	-15.5969
	9.8865	83.6263	70.1263	-15.0765	3.8112	19.1365	48.875	87.8508	148.105	303.304	62.3622	-60.6263	-22.9872	-25.4528	-4.176	2.9503		18.8597	-1.9043	-1.6645	-47.1786	61.7615	32.1224	41.926	86.3265		195.085	18.1365	17.3367	1.588	43.5242		51.1722		-16.6441	13.375		179.963	128.668	73.1263	53.5434	96.3673	113.761	46.4273	-1.8967	24.9184	-35.4235
	86.861	94.3431	20.2258	-6.801	49.7156	-8.889	124.778	73.2653	217.436	131.534	143.884	222.422	-11.2054	20.1212	-4.0804	5.2105	0.09949	-3.8176	11.7832	60.7232	45.4579	-11.5969	3.6735	-31.8827	93.1569	44.3954	62.1913	-5.2296	1.5319	3.352	68.2015	63.3036	49.0944	-14.4464	-27.1696			59.1939	274.045	68.2819	40.7258	187.059	117.847	85.1709	94.6352	-75.1952	3.2334	10.0013
	112.251	101.227	54.7283	12.9311	38.7015	-21.2347	153.529	81.639	22.3865	94.9107	6.5995	114.056	22.9579	9.2105	-13.9949	7.6429	12.8444	-10.2615	43.8151	60.2117	-55.0013	3.9885	-16.2793	-16.1492	102.727	166.825	185.578	-23.2589	-6.9337		17.0804	-15.5421	63.2334	-3.0217			5.9911	121.703	191.647	14.6582	103.909	10.8992		70.7615	5.773	23.7755	2.2283	-12.264
	157.751	138.105	100.449	-4.0893	31.9668	41.0332	88.611	-27.2411	22.3355	124.869	151.189	147.61	11.3253	31.0995	8.5536	32.4783	2.2309	21.1722	11.25	46.9069	-3.5816	14.5816	-36.8316	13.1097	97.2959	94.9796	72.6416	-8.227	-0.03699		76.773	-43.5191	17.8839	9.0957		-3.6492	5.2105	84.3367	-134.793	5.0217	82.1365	128.332		3.4592	130.128	-1.0982	21.3278	-4.2015
	74.648	108.929	55.0689	-5.5842	-16.2423	-12.0561	116.989	0.8737		122.362	98.9617	73.9196		-38.0587	7.0319	18.5038	-37.9936	20.8954	-19.7372	33.3316	59.3023	2.4375	0.4656	7.2003	105.912	83.324	90.7972	-13.588	9.8214	19.3444	77.7551	39.75	-41.8699	9.051	0.5281	9.7679	-18.9541	116.727	151.384	84.7755	12.2423	100.216	57.0676	23.5625	61.2985	12.1097	-24.1097	5.1276
	94.5293	206.429	121.451	-12.9158	-1.8367	-15.8061	113.02	78.9145		186.015	61.4043	85.7398		12.8023	6.0115	23.7385	-27.9452	34.3176	27.0804	61.3316	48.6505	-36.7997	-9.7883	11.1658	141.029	79.3584	103.07	-10.0421	25.7513	-34.6046	87.1212	66.2972	97.6365	-9.3788	-35.2181	-27.4158	54.2347		-22.6901	69.6084	69.3763	119.606	99.9209	48.7615	32.9133	-25.8941	24.7423	-20.3125
	102.782	141.355	57.1556	20.2666	9.7028	1.1518	71.0957	85.9133	77.4732	87.9375	109.42	100.421	15.5255		-30.8941	0.4158	36.3839	13.4133	67.088	41.1212	42.4707	16.7577	16.8673	-33.4235	50.0102	74.3571	40.5357	-10.8151	-30.824	-11.0638	96.7066	32.4171	46.1033	8.0089	42.0599	-20.1084	103.097		10.5599	61.875	62.6709	-23.787	54.1939	97.0344	118.523	-4.611		0.3163
	88.6556	91.7487	60.8622	-18.676	10.8878	-22.7143	-16.1556	68.0663	35.3724	85.4171	52.0357	52.9566	-7.102		-37.3265	-37.4464	37.9847	15.9809	63.6786	84.4528	0.4184	2.4821	-13.2309	3.8661	124.074	103.339	101.819	-9.4554	2.1301	33.2003	86.4949	28.0778	32.0727	-6.3584	53.4298	19.6186	138.355	36.1556	4.5867	101.455	125.279	154.302	2.1594	55.727	20.8827	-7.0102		-4.7003
	59.236		16.6416	10.4872	23.9043	-18.3533	183.842	87.7207	-28.2258	-63.6518	69.9133	108.958	-5.3941	-3.8865	15.1888	9.4133	3.8023		-7.5663	62.4541	104.356	-11.5906	-5.875	4.2462	-10.986	21.3406	110.422	-6.2219	-25.5867	35.3061	103.903	91.0587	33.7628	-5.3508	-7.6161	-13.0536	22.8457	31.5638	145.196	60.7704	62.898	181.014	58.2028	60.6492	-8.1582	-49.0918	17.139	-17.7946
	87.264		36.1556	8.4413	4.8291	-0.8316	89.324	68.9809	41.5753	249.643	15.9158	42.7372	22.7207	-31.4056	37.9082	-5.7487	-29.3584		43.2946	31.3431	112.616	10.9847	19.3929	16.5714	84.6224	24.9592	8.8865	-16.7615	63.852	14.4872	40.2105	-6.8036	30.176	6.9094	-10.4758	-0.1952	102.999	69.2041	-12.0587	41.9503	63.9528	128.855	31.7972	110.926	85.2577	16.7513	46.9375	-9.4324
	41.5727	-9.352	31.5408	-0.01913		-10.8763	43.2232	123.11	155.874	155.505	92.3673	133.449	23.4222	-17.8724	27.2398	18.9605	34.662	14.0778	23.5255	10.7653	55.3074	22.6607	-14.4579	5.0842	89.5638	115.36	70.1747	-6.338	-39.8227	34.2883	65.6518	51.5791	9.8291	3.838	41.7245	-3.9809	13.6862	175.592	211.7	15.5893	40.9094	152.44	6.0842	215.682	27.8916	11.5064	8.7781	-24.2385
	65.1696	131.79	84.023	25.9005		-1.0612	168.931	68.3508	128.749	35.4477	40.0944	133.504	-2.1429	-26.3788	-31.8546	-11.7028	-23.7219	15.7028	64.2755	41.5982	98.7895		-5.9834		80.713	87.6773	126.855	-0.2972	-30.1327	37	98.3597	41.5574	54.236	54.5421	5.0281	16.0051	44.8712	107.33	144.812	37.9247	20.4401	109.615	49.6467	93.4974	12.3176	-33.3559	-0.6518	-13.1901
	105.366	4.0651		-29.2666	-42.9477	29.5128	125.089	48.0038	66.0242	90.7232	108.449	110.017	-3.8954	23.4235	48.6033	11.9043	-1.0459	7.0217	39.125	6.0944	-3.4477				155.094	59.8036	103.75	0.08929	-5.2844	19.2411	73.625	81.6594	94.8316	-40.3801	28.8584	-12.5714	22.8061	66.0153	118.38	72.389	57.9745	64.3865	102.273	122.153	118.668	0.6263	4.4936	-0.8776
		40.2168		-23.4758	26.3839	-9.5434	165.916	80.5791	70.4541	129.597	96.9834	68.3648	15.6084	-19.6008	-30.5638	-12.0982	27.6071	-7.6327	20.602	54.0383	37.8839	12.2793		4.8686	81.0293	80.7372	93.9605	13.199	-0.07015	-13.4209	39.463	-17.602	35.389	7.3903	22.9298	3.5663	107.962	68.0383	1.8036	50.3482	68.3584	108.12	62.2181	80.0344	140.591	-5.4974	-23.148	7.2589
		93.4107	-3.1531	-23.5153	6.6365	9.2832	160.413	100.296	-28.0574	8.1314	-6.6492	80.523	37.5689	-9.4158	13.236	-19.6747	44.2806	-31.6556	34.1709		58.2487	5.4503	19.7181	24.8878	137.38	52.9783	-30.523	-21.1097	-16.7895	-19.3189	0.8329	53.1684	50.0536	26.2679	26.3763	17.0497	68.023	56.5013	120.82		36.7181	145.202	25.5676	72.7883	102.959	10.5791	36.176	32.5306
	114.571	70.2997	20.9719	-4.8559	11.4962	-17.611	109.532	113.781	96.5038	43.824	82.3763	78.148	-9.7423	33.0574	39.3406	11.0944	19.1582	-29.0753	42.4847		4.4592	7.9528	-0.9643	3.2079		124.487	82.4745	12.9617	-36.0663	-2.162	67.8342	36.6964	41.7003	4.102	24.3763	5.0446	66.6301	62.764	6.7245		63.2538	150.778	59.4541	137.064	33.8699	88.2423	35.1531	-16.5804
	55.4809	-6.7411	15.3074	-29.4452	6.8776	41.4209	72.7691	46.162	88.0115	117.462	78.2857	83.8444	-15.2806	-26.6875	6.9681	21.7054	35.3393	-34.8788	51.9719	20.875	166.075	3.5268	38.1046	17.1288		94.7474	117.543	-46.3839	-1.6633	6.8533	52.6008	108.846	40.6059	-0.7296	23.8546	11.352	14.7615	99.3099	56.2194	48.8469	28.4056	81.2691	14.7372	82.148	55.7028	20.6722	-2.3367	5.6339
	94.3801	0.2946	33.2398	-17.0829	-19.5523	31.1582	80.1556	17.4413	69.5893	114.722	47.7577		10.0408	-41.5064	-3.2857	4.3839	24.9235	-25.6582		124.008	-0.1033	-13.8457	21.5255	-6.3699	46.2436	49.3546	165.251	-3.8929	-28.5319	8.3941	27.7768	116.855	-18.5421	10.2691	-25.9171	32.6148	14.4936	93.324	86.5918	37.8673	159.124	58.5676	24.3571	139.872	34.5689	-17.4962	33.9617	17.3801
	209.328	104.568	60.4043	28.5357	-29.0969	40.4541	126.79	67.3367	78.0753	148.406	59.5944		14.1786	-9.4286	54.2015	-5.8648	39.9579	1.9031		74.8431	48.0523	5.6811	9.6505	17.0344	54.7054	114.48	84.2207	12.338	10.7564	25.602	1.9018	42.1327	37.4018	-10.2079	44.1531	-12.4974	165.943	85.3291	256.754	-2.5344	61.6747	57.0995	34.6964	-83.5242	124.602	22.5906	18.2666	15.838
	48.9911	81.1454	44.1824	6.699	24.0663	6.9503	84.5969	76.3929	-32.5242	110.515	185.485		9.199	9.5829	-10.0434	28.4235	32.4477	37.6658	16.1097	99.0523	40.4069	12.0676	9.676	8.3457	114.963	56.4617	73.699	21.5676	-19.2768	9.5472	83.4719	65.875	0.6569	-1.449	17.7105	0.7985	153.348	19.8469	105.941	51.3061		106.358	72.9133	121.833	51.5804	-32.2921	-25.7028	14.9643
	98.5332	10.8227	79.6173	16.3508	23.5893	-4.4069	100.52	41.273	124.601	66.3316	157.236		-9.8967	-4.3176	23.6071	5.0867	-19.8355	-5.3992	65.2015	91.2347	5.6556	-0.4145	8.5855	-14.25	76.6212	99.4235	139.829	16.9745	1.2372	-5.9273	16.6378	44.8788	73.3176	-4.9413	30.5421	31.1071	114.273	76.6212	116.997	30.3508		123.306	26.1454	201.888	64.2895	79.9094	8.6964	-0.4005
	114.249	103.682	112.889	12.9592	-75.9732	30.477		56.3355	65.5765	-156.926	97.2411		24.588	-17.1097	12.824	-36.5102	-12.5485	4.0778	133.732	85.0421	33.3495	-31.9094	31.463	-12.7079	-20.0765	76.6607	58.3776	13.6416	39.2666	4.6837	66.0638	54.8661	36.449	-3.0268	37.8929	-11.648	-6.6097	72.4847	174.805	-6.9094	35.4401	104.996	53.2717	21.4388	125.031	-3.7895	-40.3227	-14.8495
	104.17	14.7143	12.9579	14.1339	-28.3661			60.0651	65.9324		34.5804		0.05357	-0.3839	29.3827	37.227	-22.9923	-13.727	98.5651	-15.1505	39.3852	-52.2946	5.5128	32.4362	128.857	88.5855	56.4477	-18.5293	16.7972	43.0204	48.3916	89.1301	42.8622	0.4821	33.7041	3.2385	127.54	75.9031	-21.0816	84.3125	43.6365	263.711	52.3367	141.1	113.779	-11.7895	43.736	-33.5357
	51.2997	-30.6161	21.6276	-2.5485	-6.6671		30.7003	78.0319	75.2653		141.341		-14.2793	20.4439	9.5957	-0.9668	-24.3099	8.7003	41.6824	17.7245	51.5357	-1.7411	-9.0906	-19.7691	-41.7474	-22.4158	80.5689	5.0651	-0.9375	50.6352	56.7423	118.05	72.1135	-12.6301	6.2781	-5.6365	71.2423	146.583	180.36	134.501	30.8992	163.536		121.333	83.3112	44.0268	53.2959	26.9936
	64.1773	86.4809	14.2474	8.9069	-10.3457	5.5982	115.421	110.656	60.3763	104.302	76.9554		-3.787	28.727	15.6033	0.8291	-40.5179	22.3367	200.863	50.2219	63.176	-6.7781	-12.2959	5.9503	90.2462	90.0306	106.191	-0.8533	28.0906		64.1237	16.1148	58.361	1.0268	30.0217	9.5217	42.7538	76.2474	178.552	28.7577	65.3584	97.2449		114.052	36.9337	17.0753	20.3023	-1.4872
	57.5191	124.517	55.6327	-6.7844	-19.2092	-1.7015	23.6059	64.5128	76.0013	44.2908	22.1046		-6.0472	-2.4324	1.2028	12.4783	40.2372	-49.9247	49.6977	39.3138	26.2411	-47.9018	3.639	6.0702	43.1952	60.9005	61.2487	-16.3202	17.1569		-51.5906	106.003	71.1531	7.514	72.9413	14.7181	16.1046	95.5663	269.598	-31.2283	125.866	282.23	45.4554	90.1569	48.8151	-1.8189	36.6939	-4.4605
	67.1161	77.8878	62.5357	-9.1888	0.5115	-24.1811	60.7589	75.3724	63.0574	208.185	148.969		-36.6314	-44.4107	47.5918	-30.1212	16.4286	24.8418	39.2857	98.4413	21.4082	-14.1365		22.014	125.407	58.5778	129.157	-11.6531	16.3355	21.0702			33.8801	17.0408	2.3941	-1.4515	96.3571	47.3036	163.413	126.966	102.29	357.797	47.3087	59.0574	21.1658	49.2207	22.2398
	69.1671	6.1212	71.5944	11.0702	0.639	-4.0089	40.2066	56.1696	75.4311	95.4439	113.365		2.0166	-7.4515	17.5855	13.0689	44.4018	-60.2398	62.4796	59.2462	69.5319	-36.301		-0.2628	27.824	125.918	89.4834	7.3048	52.4643	-14.3686			26.6709	-28.2577	29.699	4.0842	83.8508	84.1786	288.406	117.458	39.4133	36.2934	127.416	55.8546	44.1059	-15.0676	32.3304
	99.8622	115.15	111.718	-10.4605	12.8087	9.9668	22.0281	37.5816	113.912	95.1901	155.783		-19.5982	17.3584	32.6224	-27.111	25.9158	-12.3712	100.228	-5.125	23.4375	6.0995		24.5383	93.2602	42.7143	119.949	-13.0548	-10.6467	13.4171	130.805	72.4286	69.1046	-23.4911	28.5931	-5.986	91.3023	105.899	228.74	117.814	120.635	96.1097	12.6901	234.762	64.2015	-9.5128	19.5281	120.648
	63.8814	100.732	113.909	23.9643	4.6148	-21.4439	-61.2742	26.9528	39.7449	70.4528	122.432		-3.8457	-15.2768	12.2551	-6.7615	29.3469	25.2194	86.0791	20.2513	-6.5612	-16.037		4.6658	84.6633	50.5319	191.6	52.3788	18.8227	-30.7704	141.725	85.9566	38.5957	1.3546	29.0446	-44.4209	89.3418	74.7181	279.819	51.2334	36.8916	143.148	24.3903	103.402	55.2334	-0.6569	-10.6862	17.6901
	5.213	79.736	52.6901	-30.3852	-13.3597	49.6773	85.449	53.8571	61.8099	104.701	137.777		5.8112	7.8788	-31.6467	-3.6658	35.7997	16.7321	10.977	64.7385	-8.6952	-9.5497		-1.963	77.9439	72.1645		6.9592	12.0038	-20.5561	-98.3291	23.3099		31.2092	-6.0102	17.1186	75.4133	39.0714	151.749	56.6263	8.551	50.3036	59.7985	118.83	32.5242	18.0676	-19.4031	-48.125
	50.0982	84.8686	29.7117	-16.2258	13.3342	20.1518	68.8776	132.126	26.5816	51.898	94.0523		15.1594	7.4375	-19.1556	-22.3227	28.1071	-3.4196	108.43	35.014		35.6008		18.1084	88.4758	89.4617		3.6556	-10.3724	6.7474	15.7423	70.1199		46.0013	33.6594			42.7602		32.6378	-11.648	199.612	91.9031	120.154	32.5089	20.8724		40.4617
	93.8827	99.9337	60.7219	22.8929	-14.7526	-15.1939	65.2258	96.7883	135.811	143.663			-5.8367	9.7411	-15.9247	-37.0421	30.0166	30.5702	112.584	49.0383		-6.8469		11.5293	78.4847	110.392	-91.3061	17.2283	-1.9554	21.0587	28.0816	45.4298	35.3202	-10.9783				103.509		59.3992	46.6314	124.097	69.1467	74.1378	55.7143	14.1237		-35.6467
	47.1798	25.0816	33.2462	12.0625	50.6046	-11.6122	44.3763	17.898	66.9439	165.73			-22.611	8.7934	-3.0434	-32.9133	7.4133	-23.9018	48.2577	9.7628	48.0995	-8.1773		-0.75	112.625	93.6735	69.4031	2.2895	-19.0102	8.5561	78.0472	19.5957	61.7844	-5.2997				154.083	-0.8202	12.4426	44.5969	263.836	90.3099	142.231	28.8699			66.5689
	77.0727	155.054	61.8355	-55.1441	0.9796	-32.7513	35.8686	41.0778	3.7449	138.82	72.2883		-0.4477	13.3316	-17.3903	37.0242	11.9962	-20.2462	64.963	64.3048	40.8418	12.1199		2.4515	104.897	204.371	69.9962	10.1492		37.1862	71.7538	130.508	-12.5128	-8.4923	-10.0077			98.6505	156.793	70.5204	62.111	191.102	33.2857	191.672				-6.6543
	84.6365	93.8253	27.6901	11.3469	22.6862	-4.1977	60.7755	32.0816		49.5931	124.255		50.9821	4.6135	1.3393	35.6327	-10.361	25.5485	102.682	79.1531	46.0791	20.0179			82.1696	6.8151	-11.5625			7.9796	-12.6033	114.005	47.6492		-21.8839			28.6556	273.575	88.7577	114.25	199.631	36.2806			-67.3355		-27.5268
	22.3355	100.292	80.9541	-5.6824	22.1786	18.6339	28.7423	120.716		121.004	33.5689		-11.4413	-4.3724	11.6008	-13.7577		-16.5957	96.1441	44.9528	25.2908	2.1365			9.4949	55.0497	34.6352		27.5969	-26.3673	110.018	93.8546	5.4656		6.0765			144.878	-33.1977	141.522	19.5625	171.439	17.5893			8.125		0.0676
	80.6288	205.579	10.3457	3.1339	19.5446	-29.2258	122.728	83.5013	52.0536	-50.5128	-25.8878		-1.7781	2.4082	14.3954	-8.0574		16.9056	93.736	67.5714	71.0791	25.6505			101.355	75.5676	57.1862	-41.3929	7.8151	6.5931	5.1952	58.7793	-25.8023		14.7946			99.2934	308.936	74.4885	60.2334	162.487	-5.5727	117.275		-57.7028		15.2487
	80.1607	70.6429	106.571		38.6441	-32.9311	48.3023	83.7895	192.35	96.4809	127.52		10.051	75.6556	-8.2921	-60.9719		-52.0574	57.6696	92.25	36.4515	-22.3329			87.4758	4.8635	71.0523	19.4936	-7.8801	1.2832	118.904	-31.9732	71.4337		48.3304			108.071	84.6276		135.838	130.318	14.5702	-15.3571		-0.4656		17.2436
	-33.6607	85.5804	84.0957		14.3189	-30.8686	60.8151	93.1301	74.5077	204.025	85.3929		8.9222	1.699	25.6237	-4.3061		21.3431	80.8852	110.115	66.5727	-37.6352			52.6173	101.809	105.357	3.4707	-42.3878	-17.1301	24.5166	71.2028	-1.6314		35.8355				10.3827		57.7666	206.329	70.3992	60.9337		-17.0332		1.2615
	42.1594	118.333	48.7768	-10.9566	-23.4439	20.463	59.1913	103.675	105.779	102.282	131.943		16.8253	42.3431	30.4923	0.3189		-6.3202	103.268	24.9898	78.5702	-12.7015			71.125	87.736	37.5778	-10.0982	-49.0204	-15.3151	-18.1339	49.4286	24.3737		-37.2372				84.4962	122.135	86.926	11.0702	66.5089	92.8316		-21.361		12.5191
	100.705	170.894	-95.6212	-3.7092	-5.7946	21.1798	51.3189	146.975	98.3189	197.621	118.936		3.4005	9.2615	6.5128	-24.3776		28.4962	87.0982	46.5408	3.9796	16.9834			98.4426	123.114	93.0523	-20.8737	13.824	-3.2066	81.4158	76.3304	69.8533		24.2628			66.1416	127.606	141.792	39.3138	-30.5855	104.847	12		-4.6952		-10.7577
	85.2781	144.537	64.1684	11.2321	-6.8737	-52.5625	88.0089	73.9452	72.699	106.486	200.929		-18.2474	19.5395	18.0778	9.3597		9.2436	107.879	96.8036	31.1709	-14.8227			68.4477	168.457	130.108	27.9783	-52.6339	-78.6901	126.203	79.5077	38.2781		17.2436			110.927	107.714	102.705	30.3712	60.5179	29.1786	35.0459		8.9541		20.8584
	44.8763	185.73	5.2526	-22.8801	-16.2156	-10.0714	38.4872	115.527	103.747	150.337	71.139		-8.2334	3.4923	-20.3865	8.9273		14.0306	129.074	67.3699	49.6365	20.7474			64.9426		40.1365	14.6212	-12.787	23.2832	119.75	35.236	37.75		8.5204			-80.9298	157.541	112.754	17.699	-3.4732	37.0995	27.8074		23.2411
	65.8852	6.9375	-104.171	16.0625	-11.4018	6.2372	81.8788	96.7283	83.0319	113.361	109.422		-1.8227	-15.4962	18.9031	-6.1709		4.7092	90.8673	38.4809	58.5548	-2.6977			67.8673		83.2066	5.0587	21.3406	30.4235	84.773	32.5867	25.6352		1.1301			110.161	186.098	195.001	89.8571		77.6097	-34.3648		2.5625
	62.5077	112.621	72.7819	-30.4158	-46.713	28.4273	57.0344	72.0472	160.006	102.597	144.695		6.8048	14.2653	-1.9018	4.3048			109.485	-10.5561	18.2296	-24.2334			107.943	85.7717	0.1135	-21.3393	8.4885	-3.5102	-195.497	27.6531	51.6033		23.7181			145.153	113.94	107.188	42.7806		29.7513	64.6365		-15.7487
	-0.4707	15.7883	124.93	-8.0255	-17.6288	19.0651	97.7347	22.1888	97.0612	-20.8342	132.148		4.0625	-5.912	-28.9056				52.5153	93.1798	12.6276	-27.3788			77.6199	113.564	104.869	5.2602	-8.2985	31.3087	86.838	78.5753	58.9273		5.7181			79.5064	141.037	-66.2832	75.8138	99.1403	-8.7207	69.3329		-41.4133
	29.037		22.5765	2.639	-20.2997	-12.4452	81.1173	86.7985	114.316	124.514	128.185		17.4184		15.2704			-16.8648	7.3597	84.0574	88.2232	-36.9056			47.0944	29.088	80.199	28.7117	-14.1543	34.4809	98.7041	63.1339	28.2602		-27.7398			-2.3482	159.366	242.912	66.4196	110.265	-17.1939	32.9477		21.1824
			47.2985	23.1645	17.7245	11.2143	89.1926	51.3074	77.0383	200.226	252.475		-11.3176		18.2883	-17.338		-24.662	81.3941	14.8087	26.3712	28.449			102.635	87.963	59.8253	-25.1518	-0.07015		112.812	10.8355	37.8087		-22.3342			53.9362	-6.2092	268.631	-36.2487	19.1327	46.0255	69.4094		26.6684
		42.3329	72.1288	-31.0128	-12.2398	-7.2487	59.2589	102.76	65.8061	109.809	164.665			19.5599	20.5038	-27.9362		36.3597	138.134	106.39	89.9668	8.213			92.8189	60.6594	40.875	-34.1378	0.1199		125.152	24.875	10.4656		-13.727			95.1607	-3.0548	120.652	54.6582	-20.727	39.4018	102.455		42.699
	119.165	60.2423	4.5408	-6.5893	-10.6097	12.1964	39.7474	72.0816	32.8265	104.102	116.194			45.0676	-12.2258	21.0523		0.5982	49.0395	78.4566	-0.04082	-43.1263			31.6135	57.8763	66.4668	-11.912	5.3406		25.6033	66.6416	13.8852		-28.0676			84.8852	231.768	212.647		181.931	80.7577	76.6301		-11.6875
	42.1837	101.634	76.8878	-14.7679	1.0931	0.8125	57.5727	81.9936	42.4018	111.157	60.9872		-6.1263	-52.5204	41.9439	-66.5306		10.2168	71.1378	-6.5344	27.1939	17.3776			12.8686	87.838	63.8737	19.3827	24.2156		205.443		26.4923		-4.8482			95.3163	3.352	120.179		97.7296	51.8125	47.8316		-11.1186
	-85.8444	19.398	64.9592	-8.4936	-8.148	-39.5931	66.6263		116.374	98.8393	96.8814		17.1913	-22.8954	26.523	58.1543		11.3903			65.5816	17.7117			56.0689	121.096	103.268	12.287	10.2449		91.6888		45.0306		7.6671			24.4107	244.173	126.936	79.3342	237.1	71.3584	54.9847		5.1505
	119.847	66.9796	60.1288	13.3151	21.3061	9.213	58.3291		65.2666	63.324	-19.4834		16.6684	-7.852	1.1263	43.1773		44.2105			82.2985	-19.4541			101.847	99.1276	87.1327	4.0536	-2.9987		40.0995		50.3916		2.0191			48.4043	74.3316	120.633	33.6747	168.27	83.7347	56		-1.4043
	113.818	110.293	30.2487	14.4094	14.773	26.3495	64.338	163.596	91.5293	77.8202	112.932		29.6416	13.3635	21.176	6.0026		13.4388	28.8036	118.042	81.2985	-37.4796			94.8827	84.7079	72.2832	-23.3482	0.9031		134.434		7.3546		31.5153			169.113	116.518	39.3724	72.551	78.9668	97.9426	101.631		-17.7054
	44.6722	112.883	32.7755	-5.2934	-2.5357	8.1505	41.1658	88.9107	17.0663	193.44	148.288		38.8176	-0.1403	4.3661	-18.1084		12.0293	63.8074	56.6901	75.6735	21.1722			-34.0944	48.1607	19.3214	-6.227	5.1837		46.2589		10.6122		21.5026			93.7207	146.094	100.351	39.2538	175.435	71.9732	30.0153		-24.1849
	25.8763	34.0906	74.5638	-13.5038	-0.2309	-35.2398	103.326	164.541	36.5676	176.606	66.8342		-13.9732	-11.9286	-1.8622	-5.1952		-3.2309	8.3482	35.5102	39.9413	21.111			95.139	111.319	89.5459	-11.9987	-0.2602		7.8176		101.611		-22.0395			88.8457	6.912	226.079	-13.1939	126.477	48.6327	52.4337		-1.4133
	165.513	46.2857	55.9388	-1.2334	-3.9898	-24.6722	51.9349	76.9847	40.6008	119.907			-0.2934	-28.6913		-61.6403		5.9809	33.2079	44.1773	-0.9056	-4.1441			79.2577	65.1454	44.764	9.2577	-24.2385		71.8112		43.1977					66.0651	148.85	74.9196	-31.6569	166.339		65.9605		1.088
	68.6888	213.135	51.1378	10.0242		-10.2041	55.949	151.088	49.7117	115.886			2.8176	-1.7806		-28.3546		-7.0153	73.2156	6.2577	0.5281	-6.1824			183.949	86.7321	53.2245	-15.9554	18.6288		129.98		62.1658					181.255	2.9413	78.6594	5.5804	27.3444		2.8074		-8.324
	140.012	35.7309	40.4872	3.3941		11.3253	78.6875	118.089	79.088	68.5778			0.1849	5	30.1429	14.7921		10.0434	-1.9464	89.0676	71.0931	16.5676			46.1952	101.236	58.2079	-15.588	-31.6518		90.4184		72.0842					33.8214	283.126	-61.2194	16.7372	74.9311		87.1467		-0.5727
	120.054	82.7844	12.3393	12.9337	8.2742	-30.4872		65.1582	121.916	134.617			-7.2564	5.699	-3	22.5115		9.1186	73.7219	74.5676	39.037				95.4349	119.138	172.797	0.1059	12.1148		31.2423		-18.2283					149.154	156.301	33.1901	59.4158	211.02		93.2551		19.2946
	116.562	24.3992	65.0038	7.5651	-27.3508	-3.0893		267.036	29.6122				12.2066	33.7832	28.1122	18.9133		17.6645	37.551	134.389	56.0255				46.0676	185.885	15.5778	-11.9426	8.5383		90.8457		10.1186					95.3839	20.3801	72.3176	42.1735	117.272		64.9349		7.0446
	-70.2985	95.5332	96.0906	7.1952	-4.273	-12.4464	72.0727	54.5893	21.3036				31.6862	42.3635	14.3992	9.6645		-25.3316	19.2232	35.3214	25.2985	13.3329			34.0128	130.621	26.3992	-3.6735	-12.6926		35.5587		57.9987					119.903	171.899	29.5395	47.6224	155.378		62.0842		15.2487
	123.818	61.5765	52.5689	5.0217	-27.9923	-3.9528	105.691	224.949	58.5166				9.176	7.6696	20.2474	19.8087		15.1314	4.9987	41.8839	49.5472	-25.2959			25.4158	80.0497	63.1633	-5.7946	-32.9145		25.9885		49.0791					148.212	75.3929	114.108	31.8622	56.9605		49.2742		29.736
	97.0829	72.3355	104.897	-20.7283	9.986	-26.0383	76.5612	-22.1531	155.531				17.4974	-15.2156	1.287	-36.486		8.9719	62.5064	47.9758	2.4617	-32.0395				40.2181	29.3839	23.3367	0.148		83.0753		18.477					35.676	260.758	82.8571	70.0918	127.953		59.2666		16.8367
	57.8074	119.239		-9.6913	-4.8406	52.6378	-12.2985	160.593	86.7589				9.2551	-28.5778	-25.1071	28.0918		-6.7589	51.5612	71.5102	-45.1875	-8.1467				101.159	49.3418	-2.4464	-4.9821		-126.176		50.3189					-104.329	27.8827	121.209	52.6046	84.9974		52.7806		-12.3699
	-49.9668	112.904		0.7653	-11.3061		50.6671	132.893	106.628				10.4605	-8.713	35.7411	10.8112		-4.824	6.2474	121.103	12.6339	8.1671			70.0064	91.8763	80.9477	-24.0089	-9.2793		47.5115		20.1416					108.585	137.338	-8.3036	57.1212	146.119		-22.9464		7.1786
	69.2423	69.1747	93.9235	12.6288	-26.1084		41.4222	126.941	41.023				2.7768	-2.3278	-8.5918	-7.4962		18.398	9.2628	21.037	63.1798	25.6008			79.2972	53.051	71.7538	-35.0497	8.102		49.3278		59.2054					90.7003	-4.1454	131.233	172.031	62.0281		49.0293		-30.1582
	108.325	174.571	77.5383	13.1901	10.5855	2.0982	60.5115	128.797	17.1926				-13.4337	-26.5497	-1.7679	-23.4388		3.0446	62.6939	95.5	57.2742	-18.8508			64.0765	114.055	90.3036	16.0191	3.7003				7.1429					115.246	275.047	206.27	39.9515	145.62		67.1722		-9.0982
	148.133	73.3367	107.371	-15.7283	11.2908	10.2474	102.532	211.024	76.4834				18.4681	7.301	20.7691	8.9311		-1.8125	28.6314	133.091		-20.1645			4.3878	129.741	141.731	162.312	2.5306				60.9668					9.6747		133.065	30.6237	165.478		29.9184		2.6314
	111.019	122.364	56.7883	1.1671	-35.7398	-37.1556	29.2564	41.8074	96.5689				16.148	12.0727	4.9707	-3.398		-29.7117	72.1531	65.8304		-32.25			85.102	67.7883	18.9069	-21.2921	3.1008		73.9911		56.852					53.6492		168.073	-6.0676	70.977		72.7143		-16.5306
	102.644	124.143	61.8635	10.6441	-6.8508	5.5676	83.4503	40.6888	127.278				-15.9375	31.5344	4.5485	-11.3431		-18.2768	-10.3457	84.6288		-38.5676			117.402	77.287	121.14	-17.8546	17.1658		12.4349		39.5765					60.0421			96.2028	108.694		41.8087		28.0727
	108.161	175.29	30.0561	5.4056	-22.6977	14.1543	61.3673	106.402					-20.0931	27.1964	-11.8839	31.3584		-2.9809	16.4056	68.9222		-23.1237			70.9847	107.606	150.101	16.9056	-20.199		149.699		62.6569					121.264			13.8788	161.876		63.4872		13.2385
	182.102	87.1977	53.4783	-3.2232	3.2117	44.5702	7.3788	47.7015					14.5344	-37.3138	-13.977	-26.551		-21.5179	38.4184	78.8788		-16.0128			45.0676	39.4656	70.5306	19.5204	11.7334		111.416		42.1824					52.8138				89.0459		41.7793		-35.0944
	141.546	103.74	43.7054	18.4056	1.926	29.4196	132.014	85.9834					2.9247	-0.9834	-0.09821	-31.4222		20.6237	10.9324	67.8342		7.3125			42.5013	40.0204	22.5944	9.4018	-25.6658		137.857		68.4133					93.0906				139.171		15.9643		12.2296
	36.1314	74.7168	152.262	-9.5255	-24.949	2.1556	-23.9324	128.43					6.1531	-34.125	26.4005	37.1199		4.3673	72.0816	71.2768		-8.3214			67.6862	110.812	112.801	27.148	8.7372		132.232		51.9401					-9.6505				155.358		61.1569		49.3342
	169.953		30.0523	5.1849	9.199	22.5625	73.0714	80.9222					-18.7526	5.0332	9.2398	-3.6403		-30.1199	63.7832	144.034		-8.588			-171.054	103.505	72.4605	44.1594			184.125		22.6684					63.7181				140.504		17.588
	133.615		47.9745	26.1505	36.0153	21.9388	33.8992	223.837					40.8418	-15.1148	12.338	-33.176		4.2997	119.892	53.6467		6.0166			45.6071	252.476	98.2589	-3.9643			300.038							106.374				141.763		75.9962
	164.625		20.2577	-21.4298	6.4732	10.1467	19.838	97.3661					10.7526	-33.7513	17.676	25.4592		39.7028	21.7219	83.0485		-4.9898			32.8342	107.997	78.7296	-7.9503	-0.4656		154.67							121.634				365.644		3.5
	155.163		188.95	20.0344	-23.8814	15.6811	21.787	105.251					-15.5536	-8.3469	35.2908	-2.1811		-0.6416	95.1301	74.4158		4.9184			80.3648	81.4758	58.5472	33.3291	-7.523		137.284							107.204				171.963		76.3444
	-89.6888		81.6161	-0.338	-11.0893	-29.3673	28.4222	230.643					-14.2066	-21.6913	-5.3074	7.2487		22.9324	130.611	20.3214		39.801			103.379	95.4834	88.8278	37.4439	-4.4298		139.332							64.0829				165.955		33.4566
	119.459		159.784	17.3176	7.6173	-43.0026	92.6352	7.5625					-20.5523	-6.2551	-28.4719	3.7245		60.9426	-15.2194	96.4247		19.1607			110.284	101.379	8.0446	-9.0599	-11.4694		114.542											155.82		26.4541
	107.042		37.8546	5.676	-15.1008	1.338	111.381	73.1378					-22.2321	17.6722	21.2028	-7.2895		-30.1454	46.5969	34.0051		-26.3074			95.1518	121.611		-6.074	6.7015		82.0791											140.819
	120.638		-73.2564	-8.7041	-11.7551	-7.4503	77.8074	41.0829					-10.6071	30.2041	-44.727			0.8992	102.464	36.3967		17.7117			48.8087	132.666		-29.5651	5.6645		-5.5957											15.0064
	75.6173		67.875	-19.5816	-23.1837	-15.7168	43.4554	104.978					2.4337	15.2589	2.8635			55.0013	77.5893	78.3291		-7.861			36.4898	67.787		38.9107	11.8622		128.935											1.1837		30.6862
	145.932		43.1569	30.5523	45.7258	12.3724	76.7449	92.0115					-5.0255	0.8367	-19.3699	17.4477		-11.875	48.6543	43.8202		10.8342			63.7054	76.5064		26.0166	-5.9732		10.0089											110.02		64.0676
	-40.6148		77.273	6.551	-5.6518	-12.2079	74.7921	80.6033					-19.7411	24.574	-20.0765	10.1952		-39.0128	120.698	11.639		22.773			62.6135			-10.9286	-22.2653		-8.3916											151.13		76.8865
	167.934		-173.213	4.6467	-0.6735	-7.6008	52.5102	99.1467					-11.9324	2.6811	2.2615	14.7844		-23.5612	51.2742			-9.0676			-43.338			-16.9872	3.0855		83.3176											6.6926		63.3635
	132.147		57.9005			15.9337	124.351	69.2793					-3.4656	10.4987	49.5778	-39.2321		-7.0944	54.9324			-31.9974			74.0115	68.0153		-4.4069	-4.8699		22.375													57.5217
	151.964		53.5472			-32.0714	-6.3763	137					-5.4809	10.7985	-17.9821	23.264		33.2717	64.3827			36.4388			76.625	29.9936		8.0166	-40.2003		106.383													88.8571
	137.81		46.6556	-23.6454		51.5829	10.1288	135.236					27.0778	29.6033	6.9005	-4.7972		4.8291	112			-50.639			75.2054	88.6709			8.5166		99.9528											-21.0293		73.5663
	62.0995		54.7423	-9.3635		-10.7742	85.4974	109.426					-14.8087		-8.6543	19.8903		-7.963	-70.1849			-22.0995			96.9643	28.9184			4.0676		30.1696											-7.2003		74.1224
	175.855		29.0523	-11.2411		10.9298		108.076					9.0064		4.0332	0.6199		8.7334	99.889			28.7679			41.736	38.3941		10.0421	20.9031													0.8916		122.57
	110.491		33.3469	-18.736		12.0306		111.36					-3.7985		7.7041	20.9145		-7.412	101.193			8.9579			107.204	4.6735		24.3036	-18.6952													30.4337		82.0434
	162.65		68.3788	-10.3125		39.6199	76.8852	120.43					40.0638		10.1926	-19.5918		-28.6365	72.7309			-9.7398			145.999	56.449		7.0357	12.5217													83.0038		93.8457
	116.556		77.2946	-8.2347		11.1964	30.9809	75.9413					-15.6288		-4.1441	5.1569		-22.6926	56.2679			-6.2143			105.691	82.4184		-3.2066	-19.1263													119.149		80.0459
	134.833		93.1327	4.8265		25.3202	145.025	112.464					31.4184		-6.9031	59.861		9.9362	55.7857			0.09311			72.9362	20.588		-3.8048	-39.5689													8.6224		114.022
	168.948		121.691	-9.8214			53.736	109.19					2.4987		-13.4936	-12.0434		-13.088	77.037			-25.4043			75.7015	73.4949		1.2653	34.0434													-13.5026		128.991
	122.585		42.8878	15.4541			81.8112						14.8291		26.6964	20.4018		-14.7207	143.117			-19.5957			63.6135	9.1645		20.3559	-5.7781													64.4694		68.8431
	-17.2577		82.6263	-11.3814			48.2258						-16.4681		-5.7041	-28.6403		6.6607	70.9094			33.2372			48.9579	6.4656		11.699	-13.5319													57.8903		102.508
	-88.1033		68.1952	-30.6122			55.0434	257.202					-24.2423		6.3176	0.09694		23.6033	151.966			6.3393			67.8508	79.5306		32.3571	27.7117													65.7296		26.551
	113.513		106.997	-4.148			126.883	137.268					13.1964		-32.764	24.7398		14.0332	37.9171			-85.4477			45.3724	43.3724		4.3967	-5.4732													126.824		67.6709
	-89.6977		90.1199	-7.9247			167.902	26.6913					-5.8087		-11.7066	19.0855		21.2538	-13.5625			13.1901			47.5357	36.8571		-29.5816	-8.5982													155.066		60.3508
	212.821		8.7921	20.5064			225.723	-53.074					17.1901		16.6875	-18.7321			103.617			1.3278			-38.8559	51.9719		-17.6964	103.635													120.529		30.3546
			43.9885	14.4643			198.707	49.9541							-5.6148	-5.5153			79.162			-34.2691			110.728	52.5166		4.4069	8.6964													54.6977		117.204
			160.915	-21.7985			138.094	72.537							-28.5727	11.8329		-16.2105	77.3852			2.8265			58.4426	98.449		-8.1301	10.7105													149.818		32.7589
	68.3737		90.7117	3.2232			129.943	52.6365					7.0102		22.4452	2.8661		21.7398	79.6199			-44.3648			37.2423	11.8903		21.838	-7.0689													-1.9069		90.7615
	73.8508		52.3622	22.139			253.116	151.051					-40.611		-9.6505	-22.5982		-1.6237				-5.3788			57.3814	30.2806		14.0395	29.4847													59.7538		33.898
	33.3482		88.1556	-7.5446			198.751	216.866					-13.3929		-30.0918	10.2551		-5.014				-7.3814			81.9426			25.2462	2.0026													73.0714		102.361
	50.8214		104.824	10.2258			105.135	154.478					4.1492		11.9617	-23.5842		6.1824				12.1658			58.9209			23.8431	-20.7436													50.0702		38.4987
	25.7895		178.689	28.3265			137.07	138.085					36.4911		23.9273	-0.04847		16.1556				28.4898						-5.8406	-1.1467													36.3393		37.3444
	92.0242		18.9987	-0.1786			76.2615	117.242					8.2347		-2.4515	0		-21.0051				8.3622						13.676	-16.1429													120.4		103.497
	57.9439		114.725	16.0727			83.7411	173.55					18.1314			44.5791		25.6798				17.148			75.3724			-22.5587	-18.0306													104.642
	104.18		89.9375	-22.6186			116.695	125.951					40.7679			-13.5344		-49.1939				0.6709			74.8929			10.5969	6.1059													16.2283
	78.1798		147.971	-8.6569			109.696	222.338					11.3163		0.2704	-11.1084		31.5064				-9.1977			117.106			14.5918	-8.5485													-11.5561		115.19
	94.1849		95.398	-4.7423			123.569	74.7832					9.3138		-6.8087	-32.8852		14.2551				43.2742			68.4745			-38.9184	-8.5689													90.6569		19.9566
	13.1173		92.1824	21.7385			83.3916	109.983					-1.4681		9.9668	18.9962		8.0906				32.1492			53.8546			34.2309	11.9936													121.606		51.625
	18.2321		111.326	-14.8992			154.482	213.681					7.4235		-15.838	19.4605		-25.0319							32.4605			14.9923	14.4668													142.615		138.832
	70.7462		75.0204	6.1263			134.644	244.814					-4.5497		16.5344	-16.1148		38.1645							99.6378			27.9388	12.088													2.3304		40.2781
	130.85		43.9898	1.3265				149.615					3.7653		9.7003	9.7781		16.6913				-0.4694			-2.5753			-10.3227	1.5536													114.176		16.9515
	104.233		115.71	-9.523				183.898					-10.8724		4.8559	9.0816		-13.9145				-0.6556			92.4962			2.6888	16.4158													21.6888		133.043
	101.736		-23.1888	-45.3125				149.911					14.6314		19.4847	32.574		-21.1888				-8.5842			122.281			8.3801	31.9821													100.656		208.735
	93.4171		125.093	8.8763				172.915					-25.2181		-15.2538	-16.5804		32.0255				-40.3776			68.2372			29.2704	25.6339													153.756		100.778
	81.5523			5.5791				60.7985					3.6875		7.4005	11.338		-1.5536				-5.6416			108.718			-8.5969	-16.2908															57.2806
	42.3189			3.4107				125.253					-7.6454		-18.2462			-8.3584				8.7105			83.6339			28.0281	20.3635															57.0217
	59.0829			-7.4362				137.798					14.1977		3.6747			5.7959				0.7143			21.5166			27.1224	29.7602															102.9
	4.0242			26.2309				118.575					25.6008		-32.1033			37.9273				-2.8967			30.4184			24.9694	3.0676															139.964
	93.8635			28.5931				-9.0816					-0.6952		23.6849			11.0013				-22.5281			78.0689			14.1824	10.7092															48.1747
	111.279			-8.4324				142.31					16.5089		-25.0383			34.6454				-1.9158			60.8176			-22.7487	-8.5753															88.5204
	25.5332			15.5357				162.964					-5.6735		-5.7143			1.9821				-1.2908			62.1977				-3.7385															104.962
	117.522			37.2041				180.906					12.3406		-15.9643			37.9401				8.6467			53.1378				16.1658															105.451
	154.325			-9.9439				-118.083					-5.2436		27.7117			11.5383				12.7793			71.0625			2.5077	-1.4056															99.037
	78.2959			-6.5561				154.369					-34.6824		0.3151			27.5077				-8.9962			75.3635			13.977	-4.0816															73.2462
	41.8648			6.139				96.4515					-0.5842		18.199			25.5638				-3.8278			101.389			2.6429	20.7168															69.926
	47.9349			6.426				159.571					8.4694		-20.9375			-12.162				-9.5089			55.7959			16.0038	26.4847															87.3406
	70.4133			15.838				134.318					-18.4209		-5.9719			12.4681				-26.1684			71.8508			9.713	40.4018															111.254
	89.0599			-18.0013				137.668					-12.4809		6.7921			-60.1811				6.0293			137.128			-0.6505	16.3788															129.955
	122.093							-67.7156					3.2398		-36.2398			-41.4311				-7.639			38.4222			1.5102	8.5561
	48.2806							188.388					-17.5166		-38.074			6.1199				-2.2283			102.283			-92.0651
	-127.162			-7.2156				111.358					81.5727		8.7181			-8.1594				0.8801			81.3801			15.4477
	97.2398			-12.139				318.971					21.1237		-32.787			-0.2602				-20.0281			26.9643			13.6518
	119.139			8.8176				201.906					3.0702		25.7168			-9.5497				-18.3584			101.865			1.1352
	59.0918			8.5778				165.916					16.6531		23.8304			-17.2245				-8.0804			73.338			10.736
	24.0638			-22.5944				138.388					-19.8431		9.6952			-10.2207				23.1811			43.8469			-51.6696
	11.2857			11.9401				299.783					3.9668		3.5268			-1.4349				-22.7347			55.7309			38.6339
	61.6722			1.9196				102.326					-5.5599		20.6212			18.7985				9.4898			54.3967			-9.4821
	79.8125			24.8597				148.497					-28.1429		28.6173			-7.1314				10.4005			88.5995			22.1071
	89.4809			-25.8827				295.385					-24.1798		6.9082			5.1505				42.3202			105.709			0.8189
	110.463			6.2883				169.823					-2.3724		18.4809			31.0995				11.7283			72.6773			-55.1161
	79.5204			6.7857				311.514					5.8291		70.4362			16.6033				5.0497			10.9082			0.6454
	72.7972			5.2526				137.643					33.9962					4.2015				20.9643			80.9745			24.9324
	48.361			11.5663				217.375					12.5					15.8584				10.2513			85.1288			-11.7372
	185.708			0.6365				13.2742					-7.0702									-1.0753			33.852			-12.5217
				1.8406				117.638					6.3916									-8.676			26.3597			12.1276
				-44.713				154.846														-27.6952			46.625			17.5344
				-7.0306				128.76														1.912			81.6288			7.7934
				-21.6224																		16.8584			70.3776			-16.0765
				-22.6429																		8.4885			99.3686			8.3992
				-4.5676																		10.8151			123.615			28.1263
				-4.5319																		1.8061			93.8865			26.7398
				9.2283																		-25.2577			60.7296			5.6837
				-19.0676																		-6.352			48.7679			15.5217
				17.9949																		-12.2857						0.9758
				7.6582																		-20.1569
				26.2513																		4.7819
				13.6301																		-13.3342
				-8.7066																		8.4974
				-21.6556																		44.4413
				-15.8916																		-10.9745
				-11.9439																		-44.4962
				6.4069																		11.1122
				28.4923																		-37.8189
				10.6569																		3.2028
				16.3967																		3.9707
				-10.125																		31.9732
				-38.3546																		36.3355
				-19.7028																		-10.9209
				9.3202																		-0.04209
				8.2589																		-10.0026
				-16.6569																		22.8495
				3.2436																		20.6798
				-30.5969																		18.9707
				1.5957																		29.2755
				-4.2028																		31.6365
				-12.3176																		1.1263
				10.5472																		-18.0434
				0.8036																		-0.8036
				-5.3673																		23.9579
				19.1582																		22.1926
				12.1365																		26.8099
				24.7372																		21.1684
				5.0357																		4.1658
				11.6633																		8.0727
				-13.1441																		15.2883
				33.8087																		-13.523
				4.1314																		26.5128
				32.6212																		-28.1888
				32.2819
				-5.6352
				-13.7219

## Sheet: mCherry-Mis18alpha
Fluorescence intensity of mCherry-Mis18alpha	HeLa CENP-A-SNAP + EGFP-M18BP1(1-1132)-P2AT2A-mCherry-Mis18alpha						HeLa CENP-A-SNAP + EGFP-M18BP1(1-140)-P2AT2A-mCherry-Mis18alpha						HeLa CENP-A-SNAP + EGFP-M18BP1(141-1132)-P2AT2A-mCherry-Mis18alpha						HeLa CENP-A-SNAP + EGFP-M18BP1(1-1132/T40D/S110E)-P2AT2A-mCherry-Mis18alpha						HeLa CENP-A-SNAP + EGFP-M18BP1(1-140/T40D/S110E)-P2AT2A-mCherry-Mis18alpha						HeLa CENP-A-SNAP + GST-EGFP-M18BP1(1-1132)-P2AT2A-mCherry-Mis18alpha						HeLa CENP-A-SNAP + GST-EGFP-M18BP1(141-1132)-P2AT2A-mCherry-Mis18alpha
	- siRNA			M18BP1 siRNA			- siRNA			M18BP1 siRNA			- siRNA			M18BP1 siRNA			- siRNA			M18BP1 siRNA			- siRNA			M18BP1 siRNA			- siRNA			M18BP1 siRNA			- siRNA			M18BP1 siRNA
	Experiment 1	Experiment 2	Experiment 3	Experiment 1	Experiment 2	Experiment 3	Experiment 1	Experiment 2	Experiment 3	Experiment 1	Experiment 2	Experiment 3	Experiment 1	Experiment 2	Experiment 3	Experiment 1	Experiment 2	Experiment 3	Experiment 1	Experiment 2	Experiment 3	Experiment 1	Experiment 2	Experiment 3	Experiment 1	Experiment 2	Experiment 3	Experiment 1	Experiment 2	Experiment 3	Experiment 1	Experiment 2	Experiment 3	Experiment 1	Experiment 2	Experiment 3	Experiment 1	Experiment 2	Experiment 3	Experiment 1	Experiment 2	Experiment 3
	168.659	124.638	7.5485	187.105	143.241	95.25	-19.9681	-1.8265	0.3406	3.398	-3.6352	31.7232	66.6059	34.5013	46.3559	8.2092	-2.4617	-9.9094	35.1901	51.9503	7.9439	-0.3661	-0.4719	-6.2194	86.0561	100.295	129.085	3.8827	-17.5344	4.7742	4.7666	263.328	123.425	116.536	48.9324	26.5753	-1.4439	5.1454	55.7079	5.514	-7.9503	9.7296
	172.932	118.792	-11.8903	131.145	75.2538	51.2054	-38.8992	-3.3304	-52.787	-25.2832	-30.1811	3.5778	49.8431	75.148	3.5982	7.6811	17.0727	9.2309	36.5	42.4911	1.1837	-7.0842	4.3878	-2.5204	-7.1454	155.869	41.801	-11.6964	-8.0089	-20.9872	0.8316	246.768	123.611	91.2985	51.6199	70.9107	30.1339	-7.6811	52.2908	13.8355	-2.1798	-0.4401
	16.8202	178.323	262.796	26.2117	146.673	53.7168	28.574	5.4464	-45.9477	-6.6722	-26.0179	-17.7577	73.5587	25.5064	59.023	-1.574	8.4005	1.7704	26.3533	137.116	-4.537	-9.8776	0.3087	2.3929	44.926	98.1441	70.8393	-11.6786	4.0727	2.5804	275.276	-4.8712	82.6594	175.311	29.102	68.0089	20.8929	-4.6237	-0.5855	-7.5319	-2.5842	-8.9043
	113.656	554.348	217.788	141.075	155.504	102.413	-48.7602	-48.9885	43.8712	4.6352	-4.273	-34.5714	-3.6607	52.426	59.8763	20.7066	2.1658	-20.5013	55.9898	66.7245	-1.9821	2.412	-8.4324	-5.6416	115.647	71.7321	26.6237	-1.4745	-70.5459	11.0217	-3.9082	276.622	112.842	154.18	50.8457	51.2207	30.6543	6.1327	43.5638	4.6403	3.5166	0.9962
	205.225	134.726	142.103	84.9566	143.733	136.189	-132.152	-17.4579	36.3291	33.301	-27.1531	8.0357	69.8648	29.5128	52.023	6.1747	4.3852	-4.102	52.352	21.4439	-30.6454	3.3061	-14.8048	-5.111	22.7589	41.3457	91.6952	43.0051	-17.7921	-8.0255	269.753	185.3	117.228	21.3546	48.8622	75.0561	35.2117	68.8138	12.7704	-7.1161	2.2015	-1.9528
	205.297	146.691	8.3712	1.0893	182.312		-27.4923	-3.574	43.9094	-5.8686	-15.1696	10.4439	39.8801	27.7462	32.6071	13.2143	5.7551	13.2168	48.9949	37.8176	47.1798	-1.1913	-7.7985	6.7181	177.302	100.445	96.5166	-19.8214	26.7679	-2.7194	198.696	360.837	89.8048	28.5204	33.3954	52.6263	-1.3367	-0.0523	114.834	3.4541	7.0395	-9.5855
	134.49	52.3852	251.792	253.488	40.0561		-48.4834	5.0995	2.6212	1.2258	-26.398	-50.7755	191.04	36.5485	18.3151	-5.5944	-3.648	-17.8763	60.3712	62.0727	22.8036	0.4719	-2.0191	9.6811	45.148	42.0344	121.9	38.1403	-35.7883	-7.0982	143.731	210.214	85.4643	109.065	39.4707	44.9158	45.0663	124.024	-0.7321	9.7742	0.4885	12.8061
	212.119	145.675	370.508	170.949	145.728	46.2245	-66.1888	-39.9043	-46.5804	-2.4605	-5.4528	-9.1913	97.3776	95.5013	33.9439	1.8827	-6.8342	-5.0969	52.6276	79.361	48.0293	11.0013	-5.9911	-1.6339	96.9923	105.468	88.5804	8.9337	6.0102	10.2334	237.559	218.652	114.638	14.3776	48.6913	40.7296	45.7768	59.287	41.014	-5.8316	-0.7066	-5.6543
	117.193	193.534	12.5969	119.108	176.784	214.254	-30.4694	-61.8023	-29.0855	38.5395	19.8163	3.2092	39.7806	9.8686	42.6696	-5.5179	-7.6952	0.5931	53.7092	108.996	81.8903	4.3941	-0.1952	-6.8418	72.0753	116.504	62.2283	12.0906	-13.9962	-9.7997	6.4694	256.756	139.728	0.4349	81.4094	45.8661	23.7844	3.4872	46.3954	-13.7934	2.0702	7.8151
	133.889	971.58	266.995	-14.5918	166.908	86.102	-85.0906	-13.5026	7.4056	-0.1071	52.9783	-7.4273	62.1237	46.9694	60.5421	11.7041	-5.6569	-0.02168	58.8482	136.288	17.699	7.713	15.6008	2.7219	68.2883	66.8444	96.0102	-3.0293	-3.3304	-9.7742	282.935	296.488	182.825	-10.1607	56.8992	40.9413	6.4273	207.225	26.1122	3.0561	5.1926	-10.9923
	138.782	257.983	235.698	194.24	190.056	53.4936	-0.1314	8.7615	29.6212	-4.7564	-7.7895	19.5561	58.264	17.1199	52.1696	-7.977	-2.8469	-2.3151	37.3023	70.2321	89.6454	-24.1378	8.3763	0.9847	64.2602	65.0446	127.939	-11.2449	14.8865	-12.7895	239.093	255.358	100.193	-5.5102	31.3673	52.2181	60.0702	97.4898	3.4974	9.5663	-3.0638	-2.227
	160.978	347.539	-3.3061	187.759	163.29	124.969	14.7436	4.6901	-33.3929	-3.1862	-15.5804	-62.0051	93.2105	44.4324	43.4094	4.3202	8	-17.4069	43.7666	86.6224	101.087	14.0217	5.9464	17.5727	75.1135	83.2691	82.2436	-53.2742	3.3584	-7.2691	232.149	349.065	136.279	110.763	29.3393	67.6607	49.4974	-11.6097	59.6658	1.8941	-1.5115	-3.2526
	90.8712	18.162	177.268	152.9	140.073	45.551	85.2895	16.176	-17.0242	11.7538	-35.5281	-66.0765	88.3712	50.787	94.5727	0.2997	5.8622	12.1403	60.523	59.1314	60.3163	1.9796	22.4426	-4.6952	12.1773	128.38	-0.3202	-25.4936	-0.699	-7.7768	154.963	398.319	132.954	4.6607	41.6327	74.0179	7.625	66.2347	66.0599	6.602	-9.6875	0.1288
	243.194	250.315	204.768	156.62	134.619	4.4324	47.926	21.139	3.0204	4.4082	-122.143	-11.102	127.049	13.4809	23.273	-11.4056	5.852	-16.4413	-77.5893	77.4643	129.839	6.9401	8.3584	8.0332	27.1339	96.4566	83.6594	-26.5	5.7857	-14.4566	76.3903	11.7526	188.94	3.037	27.2028	48.7258	23.4605	76.4643	18.2934	0.8508	3.0957	0.1033
	-153.44	209.869	-3.8801	5.8571	168.749	113.159	-0.8827	25.9515	28.463	-0.04974	-11.1263	-75.6543	77.6008	45.0383	79.5816	-4.7577		19.0242	37.4745	47.7972	44.1008	-21.0344	0.4579	-8.0842	98.4337	113.534	15.3954	-14.4158	-28.7219	5.273	203.911	459.769	216.96	100.676	57.7117	67.0191	48.0765	5.5064	28.5536	-0.9107	-0.0676	2.3023
	-15.6709	189.962	194.477	-156.584	222.318	187.074	4.514	-0.07015	11.6097	17.4796	-85.7959	-24.5255	60.0727	1.9196	62.4656	9.3342		-28.5485	48.2921	63.9758	25.014	-2.5153	9.5293	-11.7551	91.5395	65.7959	37.0778	22.8546	3.8316	0.7526	257.446	234.802	130.075	98.9923	84.4681	11.8099	46.4681	99.9107	56.0357	3.3431	4.0281	-1.3214
	465.672	3.7717	249.152	96.8151	-95.2385	27.5727	-19.9592	0.6633	-8.7028	-9.6263	-32.3941	-31.0982	124.758	44.6403	15.9872	-12.1505	5.2449	-10.7143	33.2487	95.5089	78.6837	-3.9031	-3.1811	1.352	-14.7564	138.622	78.1033	14.6786	-21.8125	6.7985	-0.08673	215.179	175.902	146.735	46.7079	63.0064	26.898	60.7946	50.0918	1.0306	8.9974	0.4681
	97.6671	160.737	197.612	-16.977	168.856		-15.4898	29.2653	-18.9209	22.9719	-36.014	-31.2857	89.2117	32.5038	68.6837	-5.6008	-3.5332	-17.1122	69.1926	70.3138	122.338	-2.4133	6.9043	-2.3291	16.7309	182.608	56.4413	55.2474	19.8457	-3.2717	183.295	232.247	95.8023	269.574	-18.4949	46.1824	50.4464	-28.6607	8.5344	-1.4413	-6.6901	1.926
	168.397	694.459	183.633	81.7117	212.195		-60.7194	7.1837	20.014	-0.3584	-26.5446	-42.6033	74.7742	0.4707	31.0064	5.5765	3.3533	-0.5625	63.5166	22.4196	67.1824	3.5625	8.7819	-7.7194	62.5663	57.014	64.0191	6.801	7.1314	-16.3482	171.528	314.108	78.611	7.9439	68.861	0.03061	54.5855	73.9235	8.1467	-0.625	14.2832	2.8776
	231.753	172.466	424.974	144.523	410.268	54.0255	-5.1122	13.4031	-41.9936	-24.764		22.1824	58.2423	46.176	48.7934	14.6671	-3.9872	3.2423	-0.1684	-0.9758	46.2398	6.8776	-0.1684	20.6378	20.7704	89.6913	67.4515	-6.2487	-15.9031	13.25	191.869	268.504	87.3878	111.81	69.3584	37.9171	34.9694	68.5242		8.0281	3.3329	-1.4337
	271.606	286.166	218.542	27.3801	156.792	103.635	17.037	-2.5204	-0.6263	-6.7219		-1.875	57.4133	45.4579	47.1467	2.7844	5.5893	2.1314	39.4809	54.7615	72.0995	-13.3584	-3.1798	6.5625	-17.9222	230.668	20.3087		13.4235	18.1161	13.0217	0.9554	88.4911	74.8903	44.4694	61.0242	41.4337	132.671		-8.8622	9.8992	15.4426
	240.449	-4.6849	108.971	233.746	106.958	10.2946	16.8508	22.1696	16.4783	5.1454	1.6161	36.4298	78.0383	100.346	22.3099	-4.3316	-10.4885	4.4184	-63.0383	2.139	121.802	0.7258	2.4783	0.9362	88.4094	77.7628	59.236		22.2895	6.9579	262.527	286.483	103.791	18.7283	41.9311	41.9809	36.5931	88.1276	39.5204	-10.2168	-7.5383	8.4311
	6.4745	205.967	7.2997	134.565	-91.773	45.162	22.6811	-4.3814	10.25	4.7296	2.8941	-0.1594	5.6301	41.926	60.8151	11.1276	1.2347	10.4962	41.5995	67.1059	111.108	-6.2079	-1.9758	7.8941	71.7207	63.3941	65.4554	39.1301	-5.1416	8.6556	208.102	183.348	1.5459	153.287	58.0332	36.6365	24.9745	43.0179	31.8635	-6.6467	9.5051	12.9656
	157.244	266.599	195.564	17.9528		31.9158	13.1301	-29.6875	4.7844	-30.8661	-95.8176	-27.3724	122.25	41.4796	35.7245	-10.3967	5.0574	-2.1161	55.2883	66.9056	118.33	2.1543	0.9758	8.6862	30.6441	112.744	36.0829	21.8367	15.0128		-2.9324	233.532	121.938	140.079	58.8265	50.6378	-1.8355	46.5523	59.3316	8.2691	-5.8112	6.4732
	128.79	207.494	1.7972	122.576		55.7959	-8.1952	19.2704	14.7015	-29.5191	16.5638	13.875	59.7997	40.9324	61.6722	16.4911	-0.8827	2.1531	33.7653	89.9962	67.8023	5.3776	-8.3699	-3.2526	62.8724	5.4426		10.6747	-39.1696		9.1939	246.042	135.598	-2.1288	51.537	50.7449	92.6658	33.6607	32.4515	2.0612	-7.9235	7.8163
	14.0651	176.274	147.598	89.2232	181.612	-173.819	-8.0281	-1.0587	1.8355	2.4528	-0.6033	10.9809	39.537	19.5867	52.5383	-9.2589	-2.5714	-17.0459	72.8112	36.4617	71.9656	10.3495	-2.2411	-9.3992	26.301	6.2755		-44.8444	50.5191	1.5306		317.279	107.912	13.4311	42.3763	61.3559	31.0944	45.6352	7.3061	1.1084	0.7895	9.9171
	248.238	171.691	109.339	181.852	185.149	69.9235	6.4821	-21.2347	-10.3316	-38.4834	31.3852	0.08291	43.6633	47.824	57.9005	9.6582	-4.1186	-18.3916	59.6135	24.3342	50.3265	-15.6722	8.7321	-2.8839	72.2003	74.6199	57.0727	-29.1148	41.9809	6.2679		0.5204	134.26	162.372	52.4273	27.6556	19.1301	6.2411	38.6824	3.4796	-7.4349	4.2245
	136.543	148.855	165.3	91.0561	80.5319	60.8508	-45.5383	34.5408	-78.088	-5.1633	1.3699	21.6161	79.611	26.7156		0.2985	-1.6645	-8.4196	37.8699	57.4362		1.3099	0.7819	5.2781	91.051	-2.3763	151.944	-21.0676	0.7844	2.2232	191.272	247.455	149.797	-25.264	36.3036	49.1097	29.1569	53.2742	19.8189	5.3788	5.2168
	157.427	485.168	165.119	192.253	73.0344	51.2245	43.8992	16.5344	30.301	-16.2423	-6.3253	-20.6811	66.4566	56.838		9.648	-13.0344	6.9477	69.9222	76.9401		-24.6071	-4.5115	-13.0485	43.8214	44.3571	21.6046	-17.2423	13.0408	-5.9311	-3.1148	337.02	113.361	111.8	74.9821	36.0255	0.1977	17.1288	7.4541	-9.5855	0.01913
	-237.235	251.202	192.145	127.019	140.14	103.758	-26.8788	4.6811	29.3686	17.2462	-11.0816	-2.3724	17.3737	55.5191	19.0638	5.6939	10.4643	9.5829	91.2258	39.0906	32.7245	7.7564	3.9732	-3.9681	60.1888	20.3138	89.4745	-51.5038	-3.9974	-36.4477	210.505	271.613	67.1263	110.749	70.7347	46.5727	16.1569	23.0638	8.2079	-0.8954	-3.4515	8.4796
	4.477	217.387	5.5765	154.855	149.207	55.5497	3.1875	31.3648	25.1148	-11.4974	-5.7985	-15.2003	48.4133	24.398	67.801	-3.75	-0.1569	-0.3202	64.6569	43.3967	15.8406	5.0485	-0.1429	-10.5013	80.199	94.7372	73.6454	-34.9758	34.639	-10.7577	5.4273	526.466	161.121	-58.8648	40.4592	67.3533	40.551	13.5855	62.7589	4.1556	4.4069	2.4043
	-25.1518		-0.3329	146.691	33.8074	73.2347	30.9987	-1.8125	48.6378	-58.7985	5.3661	-6.75	103.031	62.5918	23.6875	5.4872	7.2003	6.361	46.7691	14.8457	27.3712	9.0804	-1.9719	-1.1964	39.2423	99.7041	70.0804	28.3827		-37.1939	280.862	475.568	71.2066		45.0548	54.4171	41.3661	78.0421	40.7372	-2.1594	3.5995	-12.6811
	419.652			193.464	145.394	62.0204	-27.5344	3.0918	27.1722	-50.625	-5.9987	-46.574	7.3737	13.0931	68.7309	-3.102	-6.9311	1.1046	36.0026	1.4949	94.1237	-7.2717	6.9592	2.2168	35.6837	65.4196	61.4324	-45.1212		-10.3495	177.088	334.344	85.1327		18.9082	57.8648	67.7742	54.8571	-4.4821	3.7219		-0.9388
	180.355	98.1314		88.9222	5.0574	5.5064	26.1224	15.8176	8.8278	-14.5944	-0.352	6.0765		36.398	3.6722	18.9974	4.6212		42.0255	47.3992	37.2666	-6.7985	7.6582	-4.0013	11.5855	104.065	82.227	-76.4235	13.7411	-13.9145	144.82	186.203	-73.9401	-11.3814	67.6543	50.7092	41.1122	43.7283	-0.2219	1.1122		3.5587
	176.923	143.083	100.643		253.125	77.7398	18.3099	-8.5306	26.2487	-7.8342	-9.7181	-6.6671		22.3227	9.7462	17.2194	4.0497		18.3355	21.0548	78.0638	-1.6543	-9.7258	4.4745	34.1633	57.6161	46.4439	-62.5013	-0.8061	-17.9082	-3.426	249.7	148.481	11.9847	66.324	56.3827	48.6811	39.1378	1.2003	9.8839	4.1837	-3.0485
	214.19	53.2666	0.3316		220.89	64.4082	2.5332		-16.0089	-36.0446	14.1875	-26.6939	-3.1212	0.6875	26.1071	5.0459	6.2334	-13.8571	18.8329	55.7487	53.2449	12.8776	-1.5599	-10.7398	100.009	29.7717	51.8737	-209.911	-38.3316	21.3495	144.939	233.927	6.5625	108.622	39.75	44.3788	44.9031	17.5293		-10.8954	1.8087	4.8737
	216.973	96.727	110.934	182.559	110.566	69.9541	-39.5038		25.1952	-66.1492	-11.4464	-1.4936	-7.3788	2.8724	42.6301	3.4732		-25.2487	54.9043	63.4196	109.812	7.0064	-4.5026	10.2321	112.644		80.9681	-39.7538	12.736	-3.7526	268.482	279.18	178.985	109.557	39.5064	65.7513	76.4617	49.6327		5.3814	-15.7321	-6.4974
	190.264	82.0969	33.1135	182.041	-94.0957	65.0408	22.6161	12.4605	43.5038	-2.3839	4.1633	-2.8189	0.8967	24.2755	88.8163	-0.4196		-7.111	41.2997	77.7181	18.7168	1.9082	-8.8393	-6.6811	89.0906		25.6964	-36.1556	-30.0383	38.0957	176.01	226.819	7.1773	68.3724	22.4133	65.0115	37.6084	21.676	12.0765		1.551	-0.8546
	137.12	173.712	113.505	177.085	27.5153	69.0548	12.8686	-1.6059	3.8189	54.1173	-15.2398	-31.6786	-4.0995	29.1199	10.4528	1.8457	-1.4643	-0.6276	40.088	16.0816	56.0574	-5.4401	5.3508		85.5778	10.7959	25.898	36.6939	-5.3227	-13.2615	286.249	257.561		3.8635	68.6046	25.5153	44.236	36.1964	16.8189		0.02934	4.8112
	102.145	-0.7054	138.37	32.1148	86.1186	64.0102	-30.9949	14.3163	-0.7003	-11.8189	-9.4298	-6.8763	48.4923	57.3865	-14.6403	4.8367	-0.2487	-8.1913	63.6263	2.1339	91.9579	-0.199	7.4324		39.8112	85.5268	58.5561	-26.4298	-4.2462	8.7296	245.125			42.8125	45.0383	55.7436	121.249	95.662	50.1926	5.7258	4.6926	6.4401
	265.789	42.3776	96.1582	140.696	59.9388	54.2781	-53.25	30.1798	19.8635	12.8941	-6.6352	-5.6569	27.6327	-0.7806	54.2181	3.4911	-2.477	4.3482	52.9286	52.3061	132.078	9.3214	-11.773	-1.7398		174.853	92.787		-11.1467	13.801	0.3087		39.7666	75.8814	26.4171		47.0395	12.9018	12.4324	-3.8686	1.0281	-6.7372
	259.814	65.4796	85.7883	117.682	135.555	92.4082	-68.8788	5.4885	-29.3533	-22.3036	9.1926	0.1097	97.2411	-0.6543	22.6722	-0.2015	-3.7615	-6.1633	71.4298	19.5255	43.8227	-1.4362	8.1441	16.2334		89.8533	105.828		0.2602	-8.514	-1.6352	149.728	217.666	46.6059	24.7347		35.2449	14.8036	30.4464	6.4758	-9.2207	-0.4388
	4.1008	59.2602	-7.3176	178.341	153.658	79.4707	-22.3278	36.662	-29.6263	5.0804	5.5587	-9.977	2.2245	40.1786	61.7704	-11.2564	1.6492	-0.6135	51.7819	42.3737	101.013	0.02551	10.713	-1.0842	-6.4872	63.7666	118.244	29.375	-6.7296	14.5663	8.7551	52.4745	179.964	62.5893		-0.7054	65.6224	36.3967	10.9515	6.7921	-5.9184	-10.0663
	3.0842	125.397	7.2691	115.754	119.801	55.5969	31.3151	-28.0829		4.2704	-15.8712	-38.0064	-2.5829	7.2245	8.8788	-7.5727	7.8163	7.5995	97.611	-1.477	35.1798	5.9133	2.1849	7.9974	18.3635	66.2411	10.6952	30.7704	-13.8316	13.2615	245.202	93.3686	148.746	28.5612		42.014	102.899	33.7908	32.7309	-4.1059	-0.727	8.1952
	10.8469	126.46	181.353	22.6633	172.906	-1.3469	-15.4949	21.7908			10.3992		113.398	11.3444	38.3852	6.3099	1.9401	1.4668	48.4043	53.3227	59.0536	-19.4758		-17.0612	55.8878	84.3839	43.75	-0.7347	-47.852	30.4847	160.824	65.449	169.538	43.1365	9.9694	60.2334	97.7704	-2.4579	26.0242	8.0153	-2.1148	2.0497
	3.9923	119.764	209.353	268.92	73.2513		5.3048	30.977	-2.2143				99.0395	-0.5102	43.9158	-1.5383	-5.9872	5.1339	40.1658	-0.787	67.3661	-9.1059		7.389	65.5587	69.051	25.6556	-25.5077	-7.3418	3.0051	142.404	69.8061	162.628	-0.3304	9.3929	68.9452	105.491	-10.7054	30.875	-2.2551	6.2602	-0.8533
	2.4196	16.0115	86.6798	134.605	204.972		-10.4439	-23.0153	6.5446	-22.5727		-21.9413	2.6888	-1.398	49.963	-10.8967	-7.7143	3.0689	49.1952	40.5702	37.7245	-4.3393	-20.1454	-8.2143	42.5077	5.273	53.0893	6.2908	-0.3597	-3.3661	0.5906	61.0855	159.559	63.4298	44.0753	10.2717	79.5038	24.7092	32.3533	-10.3673	2.5191	11.5446
	0.4936	80.574	71.8176	122.324	381.543	127.825	43.7449	-14.6964	-16.5753	4.8941	-0.1097	31.9171	16.7028	19.7844	71.5867	-8.1901	7.0281	-3.111	71.0982	33.1556	34.1594	-0.1263	-6.3559	9.2934	54.8099	135.995	51.4324	-15.1429	5.5931	18.6952	148.057	33.9898	183.131	57.8023	41.2959	78.3724	28.5587	58.0459	71.9503	5.8048	4.8929	-0.3469
	-2.4005	123.654	146.144	102.667	87.9809	189.17	-31.8508	5.1467	0.7207	23.0855	3.6837	6.0651	4.5	54.1148	52.9094	-0.8699	-10.6735	-10.6467	54.1837	64.727	106.291	1.7283	-9.8967	22.2079	103.733	22.162	66.1148	5.5893	13.8724	6.7207		64.611	162.31	135.093	12.5102	-2.5166	36.6276	91.3724	46.1786	-1.7423	-0.3316	3.8265
	148.81	160.25	95.537	374.142	145.638	36.551	-33.2258	-0.9949	-11.3482	7.023	-1.6339	33.7946	189.301	-1.8316	106.171	6.2691	-4.2793	-9.2628	81.5013	8.0089	121.43	8.662	-2.0319	8.6276	56.8776	-2.2309	91.8406	-15.5561	4.625	26.8776		-54.2372	6.8495	39.9286	2.2436	163.323	36.412	38.4082	9.2066	4.9949		5.764
	212.111	91.1492	108.483	210.719	84.148	239.513	-11.0957	3.8839	8.0459	-8.4286	18.5395	-62.4745	31.7883		13.6097	7.1122	-12.0778	7.0242	39.3686	-0.662	38.7296	1.6378	-2.9668	7.3138	13.8291	123.455	84.7347	-5.3061	6.4566	-24.4043	-31.6403	70.1633	3.6543	29.273	49.9094	36.3788	40.7513	6.4145	20.0064	-5.912		3.273
	247.463	104.032	3.5344	129.602	18.7347	79.7181	-24.5651	6.2832	23.3036	3.1594	-81.1352	20.8227	110.781		20.949	10.4872	6.2883	1.0485	44.4898	1.3099	92.5982	3.8571	-3.5357	-8.5242	52.6046	56.8508	65.8431	-5.1633	-1.6569	14.6314	175.445	46.9107	8.3686	31.8788	16.1798	76.4209	75.6913	39.9923	53.5906	6.8355	0.6837	-5.852
	153.912	110.353	36.8023	3.1531	16.0395	405.054	12.3967	0.3304	-45.1543	10.7717	-8.8852	39.3138	58.139	71.949	17.074	14.7487	-12.236	-2.3724	61.9503		22.0332	1.7347	14.5587	12.1148	24.1594	83.2602	52.0191	13.2602	-22.3291		201.369	49.0574	234.162	38.102	14.3099	69.2844	66.074	25.0842	33.4719	-11.1492	-5.6671	5.0013
	220.999	9.9171	103.546	180.837		149.144	-28.0128	1.7207	-0.7577	-6.3967	-13.4936	5.1505	95.6033	14.5612	110.786	-9.1901	-1.1747	9.6939	37.7959		57.3444	-2.3214	3.9171	5.1199	44.9605	105.793	93.6403	38.5421	-8.3839		210.75	112.814	102.801	63.5931	61.6378	17.3265	78.4324	37.1339	48.9528	8.3776	-2.8457	11.3571
	218.631	6.3597	113.427	134.73		-80.8686	3.0459	-42.1824	-7.5485	4.023	25.5791	-43.1849	56.3151	3.1709	29.3508	2.5561	7.4031	2.1237	45.2245	8.3508	75.764	8.4949	-3.4452	6.3176	13.0804	12.4617	41.7168	-89.4349	-5.8788	10.3112	178.496	-11.0561	215.588	55.6199	65.3074	32.5893	61.8176	87.3661	37.1633	7.4094	11.7679	-4.8469
	93.8712	53.912	10.3992	173.557	-3.8355	115.036	14.4719	-7.6046	-1.4821	21.4872	18.051	-17.5918	133.712	137.71	76.0829	-6.0791	1.0166	7.0753	57.9069	1.7602	6.1467	1.8227	-5.2602	1.7819	53.7092	88.8342		14.4235	14.3418	-2.1977	198.977	62.4031	183.423	60.2423	28.6582	36.8291	36.2653	1.0523	18.3571	3.7908	-0.2653	5.2105
	457.298	111.417	95.0523	142.027	205.676	146.145	-47.2577	28.6773	-11.2372	28.7079	-3.4349	-63.3202	70.4783	80.3048		2.9554	5.0344	8.0268	65.4885	1.8827	69.7283		19.4145	-4.4579	63.6071	196.662		65.4273	19.7474	7.2462	193.065	57.7653	334.541	4.7066	53.8788	43.7245	167.823	26.1378	-0.2143	-11.5612	8.486	-11.1722
	216.863	65.9094	70.0319		48.0599	143.122	-24.2028	-7.3648	-34.9311	8.8227	-16.7946	4.1964	100.02	76.9541		-9.7857	2.3648	9.0064	38.898	152.469	0.426		0.1327		6.0625	65.6046	80.0842	-24.6173	-6.8265	8.6429	102.051	99.9719	160.352	82.9847	20.5038	59.4171	5.3163	66.2806		4.2219	18.1148	5.2143
	130.513	142.995	42.6594		49.8737	151.637	-24.6097	11.7602	-1.3265	24.7474	15.8367	15.0013	32.6084	52.0395	45.8176	-7.9528	11.5293	8.3648	77.0242	96.3559	111.406	6.3316	-19.1467		54.8278	14.889	-2.0089	4.0064	32.1199	20.7156	179.203	69.3546	230.07	10.9834	15.7015	68.7615	87.4732	20.4923		-2.6059	11.1161	3.4974
	72.4133	31.3546	109.136	53.2819	22.8151		1.9503	-10.1798	12.6543	10.4605	4.6263	-35.7462	62.2079	54.5676	34.1186	15.2296		-3.6161	64.2921	293.14	76.1314	-1.0051	5.6773	0.9311	57.0574	-6.5408	50.3469	47.3699	19.7577	4.1403	183.179	86.1926	207.014	51.2385	47.6518	72.4503	18.3431	23.7972	-0.1327		-13.7997	10.5816
	-26.0357	200.387	141.346	84.4184	54.2589			-36.7857	-2.9719	5.6505	1.4247	34.6671	142.972	35.3036	-3.6709	5.4987			66.7844	55.4758	29.2997	-1.3622	-8.2321	25.9375	82.5281		51.3559	19.2168	0.5013	-3.8495	173.56	71.4872	238.996	89.0727	49.0702	6.0179	50.7844	65.8941	37.1913		1.6862	4.0051
	263.117	-8.5191	25.1314	59.764	42.1339	484.032		8.3801	33.2538	-1.4643	-22.3406	18.3495	103.614	115.399	57.3622	2.0625	-14.912			69.7462	36.3712	0.3138	-3.5651	-17.0969	47.8801		93.5765	17.9171	-2.6352	21.4247	180.86	91.1798		103.364	72.6913	2.5255	124.501	76.4362	31.2742	-1.588	7.2526	14.8941
	179.554	52.3597	118.73	53.6849	95.6224	338.038	-8.9171	8.8737	4.9732	16.8801	24.7321	10.875	112.332	100.364	85.1837		8.7704	9.0446		83.4362	88.4745	-6.1888	-12.4694	-6.287	52.5587	-12.9439	68.0855	-11.3355	7.3329	-6.2653	-2.7768	96.3941		32.2372	-57.2679	27.2462	50.9464	22.3099	58.2895	4.9413	-0.08163	2.5931
	200.361	101.326	93.6684	45.8061	41.2704	334.985	39.1071	-4.5255	14.0651	17.0957	-12.2526	18.7883	53.9171	67.4503	13.574		5.736	-4.5013	58.75	116.334		9.1173	14.662	21.3571	79.3597	157.925	69.9987	-27.3316	11.9949	16.3788	181.51	61.736	137.869	76.551	3.8202	45.338	121.367	20.5128	67.9031	-3.9439	0.7959
	146.098	-2.2092	70.3316	60.5408	98.264	255.458	-6.8316	15.4732	27.2946	-6.0561	24.7717	-33.9796	51.1811	51.176	59.477	9.5344	10.2819	-2.9962	50.5064	91.6071		-0.5472	-13.3214	3.1148	56.8967	16.3546	52.5765	-31.9426		24.9311	204.018	88.7985	109.89	119.055	69.6709	-0.9847	48.5332	66.699	41.0191	-4.4783	-2.5523
	240.101	132.746	21.9847	70.986	61.3559	173.955	21.4477	23.463	11.0255	-19.7372	-13.3023	-9.301	83.8571	159.847	87.0166	5.023	-12.1059	12.2883	56.7972	203.204	114.951	8.4592	10.0242	9.5332	-1.0128	71.2934	52.6786	-36.0689		13.4732	259.779	151.709	150.089	39.9745	9.4936	41.5408	17.4018	52.3546	58.5638	-3.7041	-2.2883	6.5408
	223.819	105.411	86.6556	53.5906	52.8724	222.216	4.611	42.6339	-45.3202	11.8571	7.1339	6.8253		35.0702	81.463	-4.1543	13.7462	0.6543	61.4541	94.9809	37.0957	-8.3087	-7.4247	12.3763	70.301	43.2423	-54.1633	-57.0867	-15.8189	-5.5268	-45.9298	105.42	148.344	46.8495	72.4094	86.5497	53.3686		102.288	-8.6735	8.1722	-9.1378
	8.0867	95.1148	70.3163	65.4362	40.0446	287.205	-0.9171	18.5702	28.4056	3.102	25.2398	41.8457		49.0166	60.486	-1.4668	-3.7411	10.9133	38.7742	67.4528	43.662	-2.2602	-6.4668	-2.1811	57.176	86.6161	-3.9936	18.7105	-5.5676	0.8788	262.918	72.2321	179.735	17.7551	35.9145	44.0242	63.5689		-3.0931	12.7411	-21.523	1.0804
	184.908	119.589	63.236	36.4745	76.9515	493.936	-6.5089	-15.1939	22.4375	-32.6556	8.2156	6.713	87.6824	72.2551	54.7513	-16.3265	-1.5791	-8.1224	79.4324	41.8048	77.1161	0.8138	8.3967	-5.4554	89.8827	9.7156	81.8903	-45.8992	4.4031	-29.5115	282.704	68.7385	101.537	44.398	14.824	37.5995	50.0319	-9.4758	11.2385	4.4222	8.0714	-6.1773
	64.398	61.0625	56.1378	67.787	48.014	-7.4349	1.4719	11.9962	-22.9439	0.9222	15.9311	22.7436	-4.6862	73.1199	32.9885	-18.1747	3.2653	20.0765	113.679	144.589	86.1977	-8.3954	4.4082	5.3087	68.8839	70.4605	107.478	-27.4069	-8.1237	2.1301	280.051	103.204	113.704	7.9643	35.8839	44.0166	99.2003	7.1658	27.7436	-1.3304	-6.4566	2.1365
	2.4375	103.792	64.9043	57.1301	76.0548	109.214	-25.6352	24.2997	-7.273	-34.4349	-2.2066	28.4401	31.0651	93.8278	67.1441	7.5855	-4.2972	1.5026	48.2793	-51.6224	38.4554	-2.3508	5.7653	4.4592	102.662	53.9962	110.492	14.6824	-1.5281	-37.8788	217.35	61.4911	147.217	3.8061	59.7934	38.1543	23.3852	34.7105	64.9056	0.7793	-2.9885	-1.1556
	184.083	158.908	48.727	8.5982	56.3916	285.274	-3.3329	-4.301	10.2895	-3.8622	-14.2143	-6.1339	74.0791	-64.5931	30.4974	5.2296	-3.7513	-3.2283	84.4018	15.8163	37.6199	13.7245	12.7806	-6.4617	9.6837	54.7258	91.4503	19.0906	8.7487	8.7806	183.568	83.7513	135.061			36.1084	45.7474	53.2181	18.1875	-5.2755		-0.2347
	213.5	79.8992	12.1531	86.8048	43.0408	8.1926	9.0561		8.1696	-8.6263		-5.7717	-11.8546	37.8776	46.6543	1.3852	-8.4566	8.2054	27.4094	226.582	71.0612	0.4056	3.7372	1.773	27.5	17.7832	78.0281	31.2194	-5.7908	-2.5804	285.414	79.4554	163.272			41.1365		50.6161	9.4656	2.2526		8.2117
	188.884	82.0612	50.9005	90.1786	66.9196	284.569	-5.3776		-2.0446	-9.0536		-25.287	10.9528	87.0689	110.583	-13.1454	3.9847	10.5587	96.1033	61.9936	84.625	1.1633	-3.7921	6.5651	82.3444	69.7168	56.4758		22.8074	20.5319	309.526		215.955	151.37	221.376	32.5969		36.2985	38.0051	-8.0957	2.3661	3.8469
	-0.227	152.976	-1.2321	53.4783	-45.8214	213.105	-19.9745	-2.8992	20.1505	10.2372	-0.148	3.4974	54.551	56.5969	0.75	-11.4885	12.8457		118.44	121.216	54.4133	-3.5179	2.5	-7.4464	43.0485	17.7883	31.0179		10.0038	-3.4515	271.289		175.482	94.0957	148.556	50.5077	98.5753	78.8788	-0.8036	0.7653	-0.2513	4.6671
		72.7946	36.6811	61.5676	64.1773	824.841	6.2296	-3.6658	-0.1327	11.3495	-4.7985	14.1671	53.1327	65.9758	36.5714	-1.7985	-18.4018		58.6798	116.154	162.827	2.2385	0.8227	20.9885	46.8967	85.0906	123.525	-34.1263	9.8342	1.1709	209.045	256.073	129.712	60.6454	82.0153	27.0944	49.2194	36.2972	10.023	3.7015	4.3686	9.3546
		112.772	59.5319	54.4668	-16.889	35.352	10.5268	14.2934	0.6148	3.4566	16.8418	-8.9809	67.148	48.2793	-1.0434	-2.7628	-14.0906	-3.2717	56.2946	108.24	53.4031	4.9018	-19.9949	7.3571	83.7462	78.0765	-7.4426	6.0344	-11.2207	-19.3431	16.3316	364.08	139.722	42.736	105.475	55.2985	142.751	17.8954	-0.8941	22.5051	-8.4643	8.1467
	-4.7398	65.1212		23.9617	113.219	7.4298	-17.6492	4.1607	14.2474	-8.7844	20.4145	-8.8189	58.875	41.926	82.9196	-8.4834	-8.1186	24.3533	58.7079	81.4898	68.7092	2.6939	3.986	-2.5077	45.977	91.6403	68.0523	-27.6773	6.9515	59.9133		106.131	129.321	48.1722	155.9	-1.4413	62.6633	3.2372	45.5089		-0.4809	3.5064
	220.673	76.9783		33.3061	116.117	319.797	40.5242	8.2997	8.0931	-11.7921	6.7054	10.2117	36.4974	58.1747	6.5893	-8.6403	-3.9962	4.5855	53.963	80.3865	61.6071	0.9758	2.023	18.7474	80.0077	89.2079	170.337	-6.9107	10.6492	16.2921		205.418	153.647	121.071	157.425	71.6403	168.588	49.9222	62.2296		1.5472	7.9592
	9.7245	112.407	5.5357	71.4311	51.3202	505.455	-39.6658	-0.301	-0.324	-44.7474	12.9005	8.4388	15.0344	77.7385	114.247	-5.8227	-8.2449	16.9349	5.023	35.7666	0.1837	-1.0995	-2.3533	-6.0676	23.4809	57.1913	107.907	-38.8941	7.8036		-1.4031	222.222	210.5	48.3074	174.538	92.3202	217.668	31.7219	68.0153	2.2628	15.3112	9.2895
	248.477	-5.2041	96.0421	97.1288	77.0727	256.82	-12.1263	-5.9936	23.6492	-13.6237	15.6403	14.5255	87.3163	76.949	65.2577	-7.9094	-7.5497	-0.003827	76.0472	162.594	101.018	10.213	6.4056	16.8469	23.4337	90.2781	83.1531	0.7015	24.3661		133.477	225.38	116.004	55.2041	277.087	14.0765	89.0714	28.3801	72.7245	8.7959	-8.1327	8.1148
	101.408	105.71	66.2895	80.2321	54.5281	383.288	-7.4018	-0.1926	4.5281	41.1875	6.3457	-5.9936	71.2832	51.0204	109.154	3.9426	5.2219	-17.6403	13.3291	95.7232	54.1429	-2.6173	8.0472	20.3367	58.9962	82.139	134.721	8.6837	-6.1849	31.1824	87.7245	260.935	-0.8291	65.4821	110.199	75.6964	92.3699	45.9911	68.1148	2.5	-2.023	5.4145
	53.8048	96.4872	161.871	69.3635	39.3265		-24.1926	20.6735	14.3444	-42.2487	-19.4605	-90.014	10.5638	71.1148	7.3724	-18.5663		-7.4184	51.625	227.654	122.964	5.1365	-26.9145	2.9758	32.2551	42.8023	146.323	24.3967	-54.602	-27.0089	163.811	807.013	94.8278	64.3546	242.152	42.4579	69.4949	18.1913	-7.398	-1.1594	7.8304	-7.3125
	-31.6888	91.6645	-70.0791	75.5459			-8.0727	-32.5931	-2.1543	-17.2666	15.9413	-2.1837	41.4222	8.2679	-0.25	-11.9732		18.4107	51.2538	107.052	73.2832	4.2934	7.4426	-7.9426	57.1658	65.3878	90.7092	10.0893	-16.2474	-2.5395	193.497	115.852	205.883	102.42	169.661	33.1747	47.5357	69.0753	70.4196	-16.0332	14.9541	0.2474
	93.0727	114.805	185.545	57.3227		75.8329	-16.824	25.3597	18.5026	27.5089	-22.5013	4.0625	33.6773	5.0077		8.389	0.8304	-5.4528	59.5038	127.213	81.287	-11.2857	8.9145	-9.588	85.2883	110.186	68.9209	0.4401	-0.7117	-35.2844	9.9464	262.936	143.596	65.2564	314.855	47.7423	103.874	51.3265	76.0804	-9.4554	-1.7423	-3.051
	491.95		197.996	77.6505	44.7474	70.6352	10.5536	30.9069	14.8482	-3.7194	2.7168	-111.319	23.486	-1.1212		11.6301	10.273	7.4719	44.8393	11.9171	37.7156	-13.0995	2.0855	0.09184	52.7768	19.9656	-4.3954	-2.4426	3.477	17.8176	253.693	229.865	131.333	49.1505	-0.9923	46.2946	162.186	34.949	1.8406	8.3023	-6.0166	-0.1798
	405.949		132.782		28.3559	28.0536	-8.3839	-3.3469	-27.0855	-96.4719	-15.2526	29.9018	65.2589		21.5714	2.9298	-3.9324	-5.8304	48.3214	95.2423	48.5013	4.4962	1.1607	20.8967		37.111	-40.5204	-0.5013	5.9401	-18.5293	31.1071	391.481	118.066	131.071	264.605	-30.7232	101.332	26.1084	3.8673	-9.1301	-0.2041	8.551
	192.611	246.439	156.978		42.1582	6.6186	13.227	36.0816	-7.4362	25.0944	-4.375	-9.9158	24.4503		9.8469	-5.3367	5.9566	14.6505	101.629	132.253		6.2908		-1.3074		95.3099	56.6365	-7.051	15.2538	-24.2793	179.571	528.976	225.556	45.838	246.441	-3.0842	50.4426	55.7959	9.9668	-5.0217	0.1875	7.4783
	403.307	235.712	199.723	0.3367	50.4579	73.8163	0.1964	-16.963	-15.6339	18.2411	-12.9133	57.7615	41.662	60.2258	16.7041	-6.7704	23.8929	-3.8227	85.8074	46.5179		6.3839		25.7564	-52.8916	70.1008	77.625	-32.7946	-52.0013	-13.5497	185.917	182.282	110.927	102.258	230.031		96.3406	15.9477	3.8151	-4.7564	1.4885	15.3329
	216.616	163.783	4.5893	95.1824	51.1327	69.3546	-13.9962	1.8431	-5.8304	2.6747	4.1352	11.5651	31.4962	45.7168	46.9082	-4.2423	-4.2793	-6.2513	94.8495	-0.5714	16.4247	-2.3291	-4.8265	1.9209	48.9133	192.143	68.3189	-17.0268	-4.3355	9.1658	152.304	187.031	36.7895	77.477	129.787		59.0064	88.6441		-0.199	-2.1518	-5.0561
	192.876	141.635	25.4503	60.2844	56.9196	45.0344	22.6837	4.551	27.0587		-4.6033	-1.9247	17.8788	33.1416	57.3074	-2.8367	20.0408	-12.8686	50.8712	-10.9681	6.7015	31.5344	-7.6339	-12.6722	21.5625	71.5332	47.6263	-13.449	34.8278	2.9847	54.7245	232.061	143.929	154.777	242.036	76.375	22.3202	34.4783		3.0421	0.8061	-3.0077
	136.672	-209.297	4.5753	15.287	29.0268	44.3304	4.1237	11.8342	-18.1926		7.2168	27.6148	18.6875	72.0153	61.2742	3.9196	9.8508	-5.0191	45.8827	62.0663	85.6276	-14.3571	-7.602	1.6276	-7.8992	41.5064	100.078	9.9515	-7.3865	-9.4298	162.041	207.867	144.444	103.601	416.538	-5.2602	145.422	27.1314	0.4056	-6.9923	-11.2309	-4.4247
	171.938	340.143	151.92	124.816	32.7921	96.4719	7.8278	-17.0753	-3.0013	-30.7054	7.1888	1.9796	48.5408	28.0995	13.1276	-5.764	17.0561	-8.1645	98.9885	222.073	54.8304	-8.5217	9.8622	-13.1288	39.7819	89.2283	92.4056	-26.5663	0.9005	16.8202	155.26	341.903	184.07	122.375	38.1633	50.5038	142.546	21.0574	37.2513	12.5561	1.3367	6.2526
	179.339	127.727	18.8916	-42.2985	40.3406	-0.2755	-3.3878	16.6977		-11.3418	4.7806	-31.5332	47.5038	16.3584	55.8036	-7.727	6.477	-8.2117	66.8954	95.2181	71.2704	-3.5982	-1.5306	7.2054	23.8737	-9.3444	92.4107	0.3967	7.3699	-5.3112	95.0472	282.237	147.37	-2.6084	136.764	44.7194	-9.7436	45.4987	48.9681	12.3865	10.5612	4.2474
	287.276	237.982	143.856	-15.9452	33.8406	87.4566	0.5778	-8.3967		-25.4477	-0.4694	25.1862	45.7245	33.6314	46.3559	3.8367	-0.3814	-18.2513	67.0281	81.7704	89.9413	-1.6276	3.0587	6.1199	85.0268	45.9401		-4.2577	-6.3559	2.7436	17.1288	220.416		79.7321	233.48	88.3954	72.861	55.7028	1.5816	-13.0332	6.1467	9.014
	323.49	337.69	187.251	81.7602	52.2181	71.5013	17.5459	-8.0179	-1.2793	-38.9528	-15.5293	0.6901	52.5281	37.139	-3.75	-9.4719	10.4235	8.0918	46.7015	112.872	96.2092	-1.8316	5.3546	-0.1709	20.213	11.1429		31.7232	20.3444	-19.0855	-9.1709	219.518		62.4656	344.371	43.8176	144.997	48.8444	20.6492	7.4911	11.2768	5.4911
	149.931	397.062	7.0306	0.213	89.7666	16.2755	24.2283	3.6097	1.5497	-10.3482		25.9069	71.7347	79.9962	41.4056	13.0038	5.1301	-11.7423	142.152		34.4171	4.0663	-8.3941	-2.2615	39.9401		38.0931		-12.9184	12.2653	21.4745	357.602	3.3125	77.8482	125.639	36.0179	142.44	27.6237	0.6237	-13.9732	3.8125
	191.371	141.256	204.945	193.565	38.5077	9.5434	-21.1301	-19.4656	12.2755	15.5064		34.1543	21.4005	26.0612	28.5306	8.5497	2.1186	8.7321	27.7781		140.087	16.3559	16.5727	4.2934	49.662		108.591		-47.0408	-23.9592		330.888	100.769	100.36	152.462	55.2934	123.509	26.3673	-5.3584	-7.2819	4.9528
	169.67	179.37	115.746	120.574	42.5485	118.582	-22.1441	-34.5204	-9.9974	-2.7385	18.2793	-3.699	4.4515	60.9324	24.0485	-5.7092	-1.3967	-2.5	54.8023	2.6314	37.2844	17.8112	0.9796	2.8457	74.1212	29.8418	52.588	16.8099	-7.7003			245.95	255.86	70.8125	123.98	45.5357	106.389	48.2398	95.2296	-8.7041	4.2628	3.8227
	245.606	112.365	2.9439	66.5816	3.8138	59.7704	4.2156	-8.8151	-31.7168	26.0842	-44.9031	22.3661	74.7755	38.9452	6.4171	2.3202	3.2755	-6.6429	62.727	92.2207	157.427	1.7487	-0.5918		43.1288	93.4707	56.1046	-5.8635			-6.0115	312.724	135.416	-16.0906	280.082	0.8304		15.5753	6.0561	4.9273	8.1722	-2.9834
	174.034	63.7207	1.4286	102.583	33.6263	79.5038	-22.9158	-15.662	-7.7092	34.5344	6.3087	17.0319	26.8214	64.1071	45.7232	-7.3355	9.9426	17.6747	114.232	55.648	81.3712	6.0038	-4.1569		93.1862	-12.5829	118.852	-7.1786		23.0051	19.2054	229.356	-70.7462	3.2551	184.191	39.1454		-1.5102	88.611	-0.5918	0.2143	4.3763
	168.469	-5.639		58.5306	67.1263	36.8929		7.2015	1.0689	11.2092	-29.1594	-7.8125	42.6122	74.449	13.7219	11.3712	-3.1824	-3.2959	61.824	52.1352	13.2653	7.0765	-5.602	7.3686	54.6441	42.0689	51.5268	-27.0472	-86.7143	-7.9145	-4.0013	286.869	81.3827	79.227	144.435	58.6301	51.1837	-2.0969	52.9732	5.5383	11.5969	-4.6122
	278.082	310.087		153.713	55.5982	57.2181		0.8763	16.875	8.75	-20.8622	8.1186	29.0727	52.4554	28.9847	-19.0268	-2.0791	9.8737	89.5944	32.2793	67.0115	-0.4209	5.8827	2.6798	50.0702	81.0918	75.3176	25.3087	-83.2219	-11.273	135.421		-4.8202	49.0931	183.772	71.8189	90.8827	20.4923	44.8048	11.9974	-1.9592	3.014
	248.196	296.374	183.328	91.2551	41.2793	64.5523	80.5408		5.7156	-39.1314	-35.5306	7.4707	15.838	11.4617	18.4082	-2.0217	7.9337	-9.6505	90.6888	46.4821	126.198	7.0077	-0.8227	5.2283	69.574	46.2819	89.2768	-4.4222	-141.315	-41.1212	202.907		-0.4592	39.514	130.696	-4.6263	157.953	28.2117	46.9222	-9.3367		5.5625
	147.003	215.932	-7.9031	83.8202	40.1901	37.8125	45.7487		-5.2602	-4.2819	-33.5536	17.5434	51.0638	41.639	-3.5472	2.9018	3.3189	-3.398	72.861	84.2997	122.879	2.7934	2.426	13.7551	93.8903	13.1033	62.5893	-25.764	-75.6492	-14.9018	251.176	144.32	-0.08163	102.9	203.205	51.9936	68.3788	14.5969	46.9847	6.0255		-1.0816
	206.35	175.105	250.15	39.8393	40.7232	41.1684	5.3112	2.6862	4.588	-0.4668	2.3852		39.2372	46.5969	25.0293	6.4668	11.5102	-23.5332	39.5128	62.4043	148.057	6.6467	2.7615	12.0357	84.4107	79.1008	70.3469	-6.6824	25.6403	-4.4566	114.557	194.51	98.213	75.5689	260.749	54.6173	89.8597	57.9885	-3.4388	2.8584	2.5663	-1.1569
	217.773	142.672	27.6926	177.216	10.9031	22.2436	-16.4987	-5.7564	16.1901	-14.8087	-5.8903		33.2105	30.0434	104.139	-12.3431	1.3278	4.2411	36.588	1.8929	30.6301	-5.5842	14.6952	7.4477	69.102	-0.4056	32.8737	-33.5599	-47.1849	23.4401	146.629	69.9911	-7.3176	60.5765	122.638	61.3533	46.7895	54.5663	60.0497	-0.9311	6.4707	7.6773
	129.568	300.012	542.07	14.9503	32.2207	78.949	36.8788	-18.3036	21.0689	-2.0038	0.5969	-6.1722	24.1645	39.9375	30.773	18.0765	-11.6531	-5.3763	58.5191	36.4503	58.8571	-12.7449	4.7245	9.6314	39.9821	119.994	16.1288	0.611	27.1186	2.8903	7.1569	299.361	168.532	69.8712	127.917	46.1837	42.3852	84.3393	49.639	8.699	7.6607	4.0497
	166.591	169.213	394.611	41.1786	16.5969	42.8265	-55.1811	-71.2258	23.389	-7.8393	15.9311	0.9082	41.7781	30.9592	69.7028		2.3533		54.9821	56.9936	91.7564	0.5587	-18.3941	4.7398	78.1492	19.2615	105.225	6.5969	14.5957	17.3061	94.0651	262.423	126.657	34.0893	131.756	47.4286	114.019	38.9184	35.4286	-3.1135	-4.5434	-9.4056
	188.071	68.8763	332.411	100.756	49.7245	41.7985	21.926	-5.463	-14.2666	3.0969	-9.8712	0.5867	9.6722	5.9936	6.514				84.7258	20.7258	66.2449	-0.5472	4.2219	10.3253	70.412	85.4273	85.7462	2.8227	-13.7691	-7.7768	170.422	132.379	81.4452	20.6429	110.747	34.9056	97.2117	25.3444	103.125	2.8329	0.9987	-3.4974
	202.265	142.065	242.455	72.9592	34.8622	54.3571	21.9286	-14.1543	-23.051	2.3036	-6.6199	-34.7895	20.5689	26.7372	29.1977	2.9732		-0.5268	78.9515	22.5778	131.244	9.5753	2.5293	-11.8176	42.4413	5.0102	55.7653	-28.5051	61.926	22.4962	279.431	240.052	-2.1097	94.8151	166.251	42.3099	94.352	46.1952	68.1161	7.8176	-1.4528	2.3724
	256.597	442.162	-0.2385	29.8559	-0.9911	48.2691	39.7207	-13.861	29.8112	9.8074	17.2003	-67.574	25.0689		32.4069	10.0459	10.0957	0.5497	85.764	24.6875	3.8278	0.9018	-0.389	2.8699	0.06505	100.65	66.8724	-22.4605	-29.1594	-9.4834	120.684	141.092	94.1033		107.705	57.7232	80.2423	68.8074	50.5153	-7.9681	4.912	10.6403
	172.471	257.211	378.57	78.264	52.5064	57.4592	-28.3265	24.0791	10.4668	16.4413	-0.7934	-7.4158	18.8444		14.1429	-2.0255	-20.3457	-6.125		68.5421	80.5893	4.8622	8.7526	-3.6735	42.3176	61.4911	116	11.5332	21.0013	7.7653	130.057	104.222	7.3699		206.173	76.8903	74.7296	37.4145	10.2564	14.3673	13.4005	8.3138
	150.407	188.639	244.312	106.795	50.3724	60.2372	11.7538	-13.662	-3.3036	-1.0038	22.9668	-6.3469	29.1901	19.551	77.4668	-13.8724	2.3253	-4.5421		66.8367	81.551	-7.6186	8.4732	6.6186	34.5804	43.6237	11.0166	-15.852	76.9375	2.4286	6.0026	151.903	122.157	64.8967	141.409	62.0255	25.2334	68.5357	82.3546	0.8776	-14.1582	5.3724
	207.44	65.5867	131.51	43.7513	45.4069		15.4069	9.611	-11.8469	6.7385	27.2232	-23.1645		36.6811	15.6633	-5.2691	-3.9337	-12.037	45.6505	25.4107	106.407	4.9311	1.3329	10.4375	72.2449	113.608	25.6543	16.0893	22.8597	4.9719	3.9681	172.944	89.7449	111.439	368.957	19.5383	66.7793	17.0842	4.2551	-8.6199	-0.824	-3.2704
	206.915	292.366	180.417	79.5957	22.7602		-15.287	-40.7309	8.0855	-3.1786	-18.2449	-11.4528		13.9107	44.4286	-5.5051	-1.1339	-7.9579	75.5804	36.9426	94.236	-4.426	6.4452	12.3941	27.7857	134.04	-9.6773	4.6008	-4.5485	-3.898	265.262	153.54	229.236	99.1786	185.228	49.4107	59.0816	-18.463	48.3865	1.0689	0.7092	-13.9923
	143.64	175.496	12.6786	94.7691	80.7985		-16.2934	29.8393	8.9413	4.9464	3.6097	-21.6556	-9.4656	41.2041	31.4362	-29.4872	-5.1633	-4.5268	70.5957	43.2296	67.7487	10.6352	0.5867	-2.602	92.9528	119.991	59.0676	-27.0918	-31.8699	6.6684	165.716	16.2181	108.037	52.5293		53.4847	83.227	56.3648	51.8329	6.6429	6.4018	2.1224
	124.538	205.746	236.866	59.5676	60.8878		-33.1378	9.4783	-13.2653	-4.0153	-0.09311	-65.0383	81.9643	50.5957	18.4235	-23.0689	5.1224	9.4528	28.5293	44.7079	99.7577	-1.2296	5.2066	6.7015	39.4196	44.4694	79.2806	8.5038	-37.8916	-5.412	178.212	146.231	65.2628	83.7143		55.0778	81.2066	56.8469	55.8622	12.3635	-4.7054	3.7411
		191.985	409.694	-13.0714	56.2028		13.8622	5.0472	18.4528	-10.9528	29.6352	-13.6327	28.523	23.8265	12.2704	4.3865	15.2423	-2.6403	-7.0931	44.4911	47.0931	-5.2985	-3.4311	2.3023	54.9872	57.4541	-3.9324	-44.0434	-28.5753	-33.4375	-2.6709	151.702	85.3406	11.4528	77.9324	39.6263	76.9209	52.8355	69.3635	11.5204	-8.6556	-20.5548
		131.997	172.291		32.8163		-23.449	-31.9656	20.0357	9.8571	-15.875	-8.7934	78.1952	-26.5931	39.0064	-8.787	13.3023	6.0995	133.92	51.0051	85.0944	3.8903	0.7781	-7.2806	41.3125	63.4005	72.8138	17.3916	26.4694	-12.1122	170.903	188.797	-3.6709	197.931	37.2309	76.2283	65.2768	46.6837	35.5293	0.1224	4.037	11.9401
	72.0421	201.181	157.954		59.8622		-66.5753	-2.1148	12.8597	-19.6378	-41.3253	21.8189	27.4005	6.0944	34.2245	-3.4566	2.764	-3.7666	-21.4796	-27.1569	24.4184	10.736	-0.5191	8.8253	43.7079	55.3992	65.0548	-25.8661	31.6505	-17.2092	155.592	380.047	98.0995	163.769	53.023	61.4031		30.625	23.6403	10.2883	1.8852	10.2041
	109.686	250.103	142.411	87.2105	49.5893		-16.6441	-4.3495	-4.1199	-13.8253	-19.1084	-34.0434	80.6173	33.1735	48.3788	11.7908	8.1658	6.9885	90.8916	51.4286	50.2704	3.7819	5.1773		56.0102	-0.0625	96.1952	15.5931	24.0013	11.6977	108.571	121.194	62.2781	111.101	76.3673	54.2589		35.3776	43.0702	2.9477	1.9375	0.02679
	85.6046	19.7028	163.833	115.275	-1.4503		-25.7921	-34.8571	11.912	-7.7207	-56.5995	-2.463	52.1964	13.6186	29.8227	-15.574	-7.0944	4.1033	12.4235	2.625	85.9694	-1.0102	0.5599		8.5829	46.9809	63.9707	11.8712	-20.1684	3.0765	13.2334	198.272	108.216	5.7857	184.241	108.606	28.8367	29.6135	81.0383	10.0995	4.875	3.0434
	68.3635	252.732	144.48	168.319	48.2411		-3.2589	18.5013	-4.2526	9.0944	13.1875	9.0191	55.0497	20.861	30.7207	-3.2156		2.4222	93.014	49.0791	130.157	-7.9286	-4.6212	-25.6531			50.0077	10.2449	-7.6645	-6.6148	200.672	111.149	104.88	165.171	116.015	84.8635	43.611	45.8087	-3.5421	2.1429	-4.9872
	108.352	230.575	241.68	73.4656	83.4324		11.4196	22.6913	11.162	-12.0548	3.8099	-2.6747	30.7028	20.7666	30.5026	-7.4235		5.1645	-19.6607	71.949	54.0357	5.4375	4.4694	-10.037			40.3431	17.4987	-86.3788	16.0753	246.083	144.885	250.557	102.601	37.0115	16.1161	147.712	48.5051	56.3202	-3	5.4694
	53.2309	135.19	461.147	94.3036	102.597		20.2972	9.5153	24.4196	2.2793	12.2589	17.1148	182.578	-7.0931	12.8954	16.3661		17.5548	70.3163	58.9541	123	0.9375	-9.361	-10.2742	68.148	87.2513	57.301	4.6671	-64.9005	-37.3597	132.981	141.997	161.319	127.432	104.463	42.6492	40.1314	49.9707	32.9617	2.4503	-9.4962	18.824
	-171	77.7117	4.2398	64.8393	53.6913		-37.8737	25.6964	-35.0842	-17.5204	-12.4145	8.4668	87.7003	2.4872	34.176	17.0332		2.7105	71.2309	12.7015	54.4005	2.5765	-8.6059	-2.7934	89.6122	98.9464	32.0319	-18.8469	-40.7691	-16.9311	170.263	131.23	227.42	114.948	51.9349	39.7385	24.8724	53.0765	36.736	6.7321	-13.0778	3.8546
	129.014	300.208	234.591	61.1594	79.398		20.125	33.5344	-17.0778	-15.6429	10.338	-17.1684	63.0242	38.5829	33.2105	7.213		9.273	80.736	66.662		6.861	-7.4158	-15.5842	-68.6212	16.6097		-0.4796	-13.8406	-14.1543	190.517	88.8929	81.5599	96.676	25.4439	23.0829	37.4209	62.2768	6.3482	5.9707	-5.2334	-10.1288
	140.695	419.732	68.023	61.3265	49.1747		0.9643	24.8954	-3.9452	-21.2041	-0.3941	14.9107	86.8712	47.2334		-20.2347		6.2883	36.4847	71.7857		14.912	-9.9209	-5.9273	-13.0714	56.3202		-11.7003	-5.2742			114.268		53.9426	28.9898	51.611	33.1008	28.8036	53.0676	-17.0778		5.0102
	92.7054	212.802	173.909	80.2691			-9.0893	-4.426	-14.2666	0.5957	13.912	-11.2207	77.5115	11.1033		-29.8316		10.7908	27.236	32.1199	-8.7143	0.1913	-0.5013	16.398	34.6084	102.369	68.0561	-32.5306				179.671		116.675	81.5421	50.8788	23.1429	41.6594	51.5026	-4.2449		0.9974
	80.6492	-202.212	234.256	132.196			-31.0574	34.9974	-23.4056	8.4209	31.0753	4.8508	67.6429	-7.6224	26.1582	15.9464		1.6671	80.537	84.0166	69.236	1.9235	-0.4145	7.0944	61.8202	-12.9056	147.204	1.648				294.42	-1.9477	7.2793	81.4643	89.824	28.4974	41.7296	14.5306			0.1658
	87.8227	93.0383	3.3865	111.753	162.656		2.4554	-9.551	-8.7168	31.6569	38.6696	-20.3291	9.4911	28.7679	26.0969	-18.9592		3.8661	68.5204	77.25	33.5242	5.9987		10.8202	49.1467	202.699	92.727	-18.9222	5.2513			157.227	129.475	103.931	37.3941	62.5102	35.7691	45.2921				13.9592
	229.626	110.895		59.9528	204.732		-57.0434	12.0612	3.4005	13.3495	9.5383	5.0867	72.0281	70.6518	37.2908	-3.2895			77.7474	7.4987	-0.3469			-15.2526	-23.2628	199.619	39.3724		11.9783			144.787	161.492	174.811	141.714	46.0612	21.1135			-9.0497		-10.2194
	103.541	254.573		192.782	188.205		19.9145	-0.1148	-3.5217	7.6441		14.9643	22.0459	26.7168	63.4273	11.0663			11.9094	57.9732	11.3941		-1.7436	-11.6301	82.4069	124.275	60.0918		1.4566			297.291	-5.5383	160.85	57.2577	28.9107	24.4337			8.889		7.5153
	220.49	381.233	75.5944	11.1008	-80.3648		8.8329	24.3699	25.3571	15.5727		5.9911	84.9911	31.4452	107.695	2.3099			50.4426	49.9005	44.8457	-7.477	-2.352	-12.8355	40.7819	112.764	79.1071		-1.477			149.626	158.532	133.626	58.963	47.0969	-4.111	46.4324		4.773		3.6339
	56.6582	155.834	108.879	127.043	169.6		-0.7194	-0.7411	-16.0612	-17.0459		-17.6429	63.3253	40.9107	39.7194	-7.5982			42.4388	10.9783	41.1403	-4.8673	2.5166	-2.3431	45.3827	-77.023	29.5217		13.4592			177.005	129.721		143.883	40.2679	25.0293	3.8954		-13.7768		6.2398
	98.1735	247.807	124.231	96.8469	85.2602		-24.0548	31.486	29.162	12.4885		-22.0523	68.301	30.3763	9.3482	-2.8202			6.0089	4.301	53.7538	0.9732	-24.1327	7.2717	44.4286	134.328	73.8214		14.3852				-1.6773		77.4668	37.8865	32.1199	66.4745		-11.8495		-3.5969
	111.312	241.721	269.922	76.4592	212.406		4.8393	-3.3418	-16.3227	-25.8189		-26.8138	72.0931	37.3929	76.8559	12.4898			32.5434	8.8929	23.9847	-15.4222	10.4043	-4.875	-19.6199	67.4719	95.1888		-4.6454				129.625	32.4043	206.889	-3.0434	56.3099	47.7704		-15.6492		15.4349
	122.812	275.645	62.2628	104.934	174.111		-33.5191	-15.9375	5.6964	-4.3852		16.0306	73.4541	15.7538	56.5026	-5.0179			24.227	10.9758	45.2168	6.4158	7.764	13.9898	56.7283	118.024	49.1492		19.2003			180.988	104.392	73.7538	75.4592	7.0446	63.361	62.1314		15.514		-9.1786
	138.744	140.843	124.061	85.5268	249.546		-19.4184	36.3699	-3.6798	9.7156		33.3355	79.588	24.4719	73.9222	2.2372			30.5319	5.551	72.7105	3.9426	8.4273	8.4541	41.1913	104.019	108.494		-21.375			179.863	89.7985	11.4605	66.889	31.2704	21.0026	4.2755		1.6747		2.8827
	82.2577	179.723	112.689	64.2117	190.05		16.6339	24.9018	5.5332	-2.5778		6.1722	82.9745	10.0332	36.3087	4.9362			49.3099		37.5906	3.7513	-0.25	11.412	79.1875	26.0204	50.6849		-11.125			137.302	113.784	38.7768	79.6352	-4.5128	60.9668	3.3597		-1.7602
	101.686	360.736	120.565	118.987	187.829		2.4719	20.7615	-3.8622	4.3099		11.7156	60.7959	29.3776	64.1276	1.7015			85.6735		44.5714	7.2054	-2.4809	1.5816	55.3189	88.9962	60.1212		18.9273			154.611	151.709	51.2666	83.8304		19.051	2.9094		14.4554
	97.227	210.812	197.938	76.9375	203.878		31.3559	-3.4566	34.0434	-0.5102			54.4732	7.0497	26.8125	-3.0408			117.866	8.3099	50.8878	-0.06378	10.7589	3.602	-77.0791	14.9579	127.466		-0.6467			374.269	100.389	42.2232	39.6811		33.8597	31.4847		-7.0702
	102.635	180.508	79.2219	15.1403	209.023		-22.9872	51.9694	2.0064				50.6084	48.5982	63.1645	10.0064			64.4043	20.2347	52.6288	2.0753	-12.0281	-0.1582	55.2296	152.99	119.185		-0.9171			174.709	130.788	-7.0651	92.8151	31.9834	-11.5459	50.0319		-6.4745
	118.022	133.593	147.593	52.2653	169.415		10.037		4.0153			-1.1722	0.926	30.5013	53.148	-10.2972			32.9107	42.6467	31.2781	9.236	9.7934	12.2181	80.0013	65.1161	84.875		-12.1582			0.2755	211.23	70.3801	54.727	79.2436	25.8903	-6.9796		8.6556
	66.6531	285.651	71.2781	93.8699	232.387		-21.4962		7.6773	-16.2296		-5.3074	57.338	8.7423	11.2296	-8.0191			78.7895	32.6161	31.9911	-9.7679	0.7768		109.033	-36.5638	78.4617		-3.9082			129.02	-2.4286	59.5497	56.4579	52.6735	-9.6901	53.8112		-8.0791
	107.486	178.069	86.0051	102.188	119.783			-14.6811	-73.7398	6.6161		-6.2564	107.125	31.6059	43.7334	-10.7755			124.861	54.3482	42.2398	2.0931	-2.7423		63.0638	33.4643	66.7615		-26.3648			216.223	80.3648	37.7551	50.1237	-15.5485	30.4923	59.6939		3.5293
	86.8469	125.532	133.751	65.2245	103.902			24.9222	-1.9184	2.301		-9.9247	56.4656	8.7959	34.2755	-6.4911			32.361	21.1276	37.0357	-6.4069	8.8023		56.5	132.046	30.6786		18.1658			223.5	183.865	36.014		77.4885	56.1926	20.2551		-3.0485
	129.948	168.952	79.3941	97.9579	143.602		-9.5204	-14.0625	10.213	-30.5663		-25.426	115.46	3.3852	33.6161	11.4018			-0.04592	22.0561	47.8788	-2.3355	-0.2245		127.449		50.7462		4.2538			150.241	0.8737	32.4783		32.2092	24.5523	25.2768		11.8903
	96.5115		103.653	89.1735	0.6964		45.5319	-0.09949	-30.3546	-11.8329		-2.1161			26.3916	-6.3265			95.0179	44.102	49.176	10.9375	4.5523		37.0102		86.4617		-14.7883			-2.1301	253.047	44.1403	185.413	74.1327	48.824	16.2207		-4.5995
	88.176		78.8431	81.8163	30.8903		68.8087	-3.1071	11.8508	56.5446		9.0574			98.2895	8.3954			38.4375	-4.2857	50.6671	1.6633	-8.4707		38.6798		229.612		-18.9401			108.064	47.074	46.9311	265.434	69.0357	12.4452	53.1926		3.1084
	58.1671	359.163	138.316	59.3189	170.003		84.1594	-0.5051	22.3571	-12.2028		-70.0026	18.4732	88.3355	56.574	-14.2768			64.2908	23.2538	33.6008	4.9758	33.9005		88.8724		136.751		-10.3839			340.599	141.101	37.6735	365.545	49.6059	72.3329	67.1709		0.6237
	54.9732	163.736	0.9401	100.476	123.631		9.4413	-16.023	20.3699	4.6339		14.6429	52.6645	78.4311	51.4464	10.1008			-73.1212	26.9809	6.7449	1.9515	12.2321		60.2334		19.4719		13.0599			149.644	134.677	24.5281	125.092	67.4758	41.2793	10.1059		6.0663
	187.408	56.8737	119.355	103.422	114.575		-11.9528	-48.0676	12.9247	-11.0191		10.3393	13.0612	51.6735	23.1645	5.2258			98.264	48.2742	38.9936	1.727	-18.5204		1.6352		116.167		-22.5077			164.488	-6.4184	106.386	-4.5995	57.2028	58.4145	31.4375		1.111
	116.799	160.481	-2.4809	77.6888			-66.4439	2		44.8635		-4.4158	32.3355	58.4247	11.8355	9.9477			38.6224	31.4528	32.25	-7.7628	7.8482		36.7449		100.02					119.333	201.657	37.2232	6.2436	85.7768		29.1378		0.7793
	97.7436	174.731	69.6173	57.9362			10.9579	0.2997		30.0931		33.3788	75.6467	-62.7411	14.3278	-1.3125			132.588	48.1824	30.7934	5.5842	9.088		51.3903		106.598					213.578	0.2028	41.213	-24.9413	5.574		-2.0855		-17.9898
	88.0344	239.777	87.5332	90.2883			20.2015	-10.1811	8.3406	22.7181		11.5561	11.139	65.088	24.986	3.5995			40.9145	-0.3648	46.5077	2.9235	-34.264		61.8495		36.477					161.412	133.869	-23.037	112.574	58.5293		11.699		-10.5689
		195.629	169.862	105.036			-39.8724	-9.8278	38.4413	-32.6849		9.0548	28.9018	66.0026	35.9821				72.9286	36.0791	22.3839	-0.2615	5.7181		23.4541		107.695					304.159	229.587	25.1658	228.467	69.2972		10.1314		18.4107
		292.929	151.839				-3.8495	1.0319	-5.9464	10.5306		-2.5026	35.9528	133.9	3.2296				50.7742	44.5434	23.5842	-10.8023	38.6888		51.2474		101.796					235.21	10.1059	39.3661	184.393	34.6148		11.0829		-1.0293
	61.3941	182.051	9.8048				-3.4821	38.6276	17.5893	2.551		35.3355	15.8839	28.7015	32.3418	-6.1161			28.338	46.6097	21.9107	-4.5969	-19.6964		57.9082		107.963					164.125	210.622	7.4923	248.56	63.6084		31.8788		4.9209
	225.198	223.307	95.8814				23.0268	-15.3903	-9.5944	8.3406		11.1798	-18.2168	51.912	34.7449	-3.1862			27.2258	27.4043	18.4707	1.4477	1.4503		62.7577		172.517					346.401	145.222	46.3253	261.365	30.1429		36.2449		12.3087
	186.779	-82.4196	173.717				-11.8967	-20.9566	-18.5804	-49.6939		13.3648	31.1378	37.1429	23.537	-17.3571				38.3036	20.2768	2.4681	15.3087		36.7806		154.666					136.163	167.744	47.2844	306.629	92.2755		18.7219		-5.0026
	72.6186	241.145	178.77				9.75	-20.2717	4.6365	-18.4707		19.4796	40.3125	65.4783	-0.2959	-7.4936				33.9018	23.5306	12.8125	18.7487		-90.1824		148.698					-17.5765	5.4528	53.2704	158.481	53.1454		17.6913		-18.2372
	160.652	229.37	146.227				13.3189	11.7117	2.8776	-5.6837		-8.0166	27.1569	39.1684	31.2385	-3.9311			20.7372	52.0982	29.588	-6.4273	10.9005		44.051		52.7564					169.292	202.958	-6.3916	215.689	64.7768		-2.1735		12.4809
	393.95	178.534	55.2742				-3.4643	13.8712	-24.8635	-8.1199		-19.0013	16.5982	3.0383	46.0574	8.4362			64.4362	32.3878	26.2934	4.3469	12.5587		52.7806		85.5561					188.384	-1.6301	63.7245	212.467	47.8661		31.0829		0.838
	405.869	141.097	7.2666				-0.4885	8.3125	6.5842	4.6939		-16.602	17.7398	83.3023	31.1569	3.1518			48.5191	43.3724	44.037	0.926	-1.1237				110.999					59.639	338.695	82.2041	174.545	52.574		20.1467		-5.861
	405.907	350.154	152.483				-8.6709	-18.6633	10.7258	-0.3469		-8.4311	37.7691	60.8724		14.0906			17.2321	37.4158	23.8393	20.1224	13.6403				21.8941					130.709		45.7883	7.8852	86.0089		0.2487		5.2806
	115.008	-62.4987	154.647				22.8176	-10.8125	0.05102	6.4783		-19.9515	26.5077	30.0115		5.4196			47.7742	46.2895	12.9707	5.3074	18.2168		111.19		89.7946					159.745		53.6582	5.5191	46.1301		24.1186		9.4617
	272.462	148.666	155.92				-4.1505	16.8265	-5.773	5.6135		7.0421	-3.4911	35.1824		-3.7258			27.4247	45.0893	28.8355	11.7143	5.0191		18.6696		111.204					96.2334			372.732	89.5077		27.3776		9.0255
	129.485	113.429					27.4809	-0.1084	40.3074	-27.0166		0.06505	14.9056	84.3724		19.1786			51.3724	25.5957	59.6327	6.2781	2.1837		207.857		79.7449					272.793			20.3533	57.3151		13.9056		20.3048
	-44.6582	112.106					-25.25	-13.6467	16.037	-14.449		-25.8533	35.2462	7.1607		-1.2372			13.1658	26.398	46.6263	-3.2168	0.8827		174.232		103.049					179.52				69.2003		49.2691		3.9668
	471.779	180.362					-28.0332	-19.0306	-17.7997	-70.6033		-54.699	-5.4758	35.324		-1.074			44.4222	11.102	37.9592	-10.9005	15.1671		106.866		134.476					159.885				80.4222		-15.4477		14.2003
	-119.323	228.047					23.5931	27.9758	-45.4145	3.2411		-17.5	21.6658	88.9821		-0.2997			63.1071	66.4821	12.0268	1.9898	14.1926		130.395		180.449					72.8737				63.4349		36.5472		4.1875
	199.179	53.7895					-0.5434	-1.4936	20.8291	-3.5893		-18.6926	56.1135	53.1339		-1.852			-22.0293	26.1339	20.1429	2.9349			306.082		160.393					174.971				37.2474		28.3367
	69.5383	486.663					-40.0357	8.6786	-47.8099	-9.6314		4.3597	11.8176	80.6543		-6.2181			63.0714	87.4184	5.1913	-6.6097			356.217							206.892				81.3151		27.3839
	-0.8431	111.222					47.801	8.8482	8.4694	-5.9885		-1.4949	12.1582	30.162		-35.375			17.088	-0.4477	30.7717	5.3304	-1.4617		129.909							308.611				196.574		15.7628
	77.1977	190.29					-37.8622	71.3763	-23.1875	1.7857		4.8661	9.4209	31.412		-26.0536			31.7092	36.4719	25.2347	-0.8801	-43.602		168.934							186.394				73.037		43.4758
	50.1977	138.758					-90.7513	7.5816	-49.9107	-0.4324		12.3903	25.5485	44.5357		-7.1888			50.5612	33.3138	34.3304	3.6288	-1.926		190.844							181.441				90.0574		32.338
	281.084	94.4707					-46.5561	16.1492	-43.6531	2.037		-4.9962	25.4401	19.7143		-3.0714			41.9247	54.5485	-4.6199	1.2398	6.7755		173.439											85.477		16.5128
	300.319	267.693					-31.2628	18.7474	18.574	-4.0561		-9.8903	7.389	35.861		-2.7143			35.3597	44.2666		-21.0906	-15.301		111.517											53.3878
	126.45	98.1505					-28.5663	38.5472	-10.0485			-2.3801	68.3737	29.8916		-7.0115			15.2513	29.5497		-14.2245	10.5778		13.0804											6.2781
	309.805	208.98					-22.7207	-35.7985	-22.926			33.5982	20.1301	69.9872		-11.2653			58.3737	28.7334		10.8967	4.5931		136.487											-12.0408		18.4337
	245.74	199.314					-23.9809	-8.4222	-4.2296	3.1122		7.0753	46.6263	19.7041		-15.5332			35.7258	40.8852		-6.6645	6.5472		30.4184											93.3852		53.3903
	409.508	174.744					-138.71	-10.1977	-16.6327	-7.2768		-4.1543	31.3559	42.4018		3.9515			34.4503			-9.8048	-12.9783		5.2908											105.43		57.0523
	113.955	129.176					12.5344	-19.4145	-16.0128	33.5013		5.7577	46.6633			-6.0344			-0.05995			-7.463	18.6122		50.9617											7.2258		40.0982
	208.64	245.695					1.5191	3.6059	40.4018	37.1008		-7.2258	41.7577			-16.2742			59.3827	122.283		4.75	2.4464		19.7092													33.9133
	2.2615	226.848					-27.9617	-1.3878	-41.3406	-8.0281		28.5434	5.6339			2.1964			32.6186	66.9592		7.375	0.4107		47.0804													45.6033
	74.3508	247.492					-15.6556	12.9094	4.4031	6.9184		-7.736	55.7781			-10.8112			51.2806	149.812			3.3827		88.7844											-6.8265		56.5536
	255.316	213.838					-24.6097		-25.1964	-13.6952		-1.4732	-66.4158			-5.0319			29.2258	99.9349			-2.7232		-0.5051											-0.5893		16.2895
		221.376					-2.2589		-5.551	7.0638		-17.3291	14.5332			20.7143			16.9209	114.04		-4.023	-4.7589													2.3074		41.0944
		350.466					-14.6633		-3.3584	51.139		-19.1492	42.3776			6.4133			57.2041	6.9681		-2.3852	-9.1339													20.9273		35.1314
	168.388	255.551					90.1913		16.4056	0.1824		11.4413	35.9821			-6.375			77.0115	63.5051		-0.1824	-3.051													45.3393		41.2895
	2.2755	331.376					34.3125		-3.4311	-38.5689		20.3444	21.8393			2.0242			12.9515	164.139		7.4209	0.06505													33.4605		40.3469
	338.645	119.556					37.0242		-65.949	35.0842		-3.9821	17.1352			-3.6939			43.5791	95.5957		9.1441	-4.0204													33.6173		78.7972
	94.0357	202.397					42.4668		-22.3712	13.8673		-22.2487	32.4464			-3.1926			15.9018	100.321		-8.5	9.3724													-28.398		29.3112
	135.856						-0.301		-16.8163	25.9872		-17.4375	64.4324			-0.4401			37.1977	149.381		-6.6901	-13.0574													64.5867		38.7092
	207.852						-22.3163		-14.861	-1.3227		0.838	17.4235			13.4235			27.7513	-2.8903		-5.398	-15.139													39.9133		40.9758
	214.23	353.228					-39.6824		6.1658	21.3571		-27.5434	59.7423			11.602			17.4694	198.94		4.3406	19.2985													82.4311		31.1645
	244.74	172.639					7.3316		22.1773	24.8661		12.287	7.4643			-4.6327			38.1798	86.2691		6.699	-11.6046													37.2181		49.102
	174.696	141.779					-7.2768		-10.0166	21.8304		-20.1964	1.3316			9.8929			38.8903	150.876		3.4949	-2.213													71.361		16.5191
	256.68	-118.436					90.2156		-48.7946	-24.4834			35.2334			7.477			5.6378	52.6352		4.2985	19.1467													45.6263		6.2168
	233.504	72.4145							8.25	-45.9362			66.3495			-16.8929			21.6964	54.9018		-4.8125	-10.7755													36.4809		42.7564
	87.7513	149.557							-33.264	22.9094		-15.8444	51.9298			-12.6645			49.2181	185.85		4.4783	6.0727													32.6467		32.1913
	135.483	78.949					2.1008		11.9388	-2.4732		21.9962	17.514			-1.9426			34.1276	59.5281		10.0204	6.0548													3.1288		32.0179
	183.546	58.3444					-9.4936		13.4936	3.602		12.8699				4.7755			55.0421	67.7143		4.0459	-4.5957													47.2245		37.8954
	308.857	149.77					-2.4031		-9.7092	-17.4821		-6.5395				0.176			40.8316			14.9413	1.1008													52.5574		41.1084
	96.0166	118.838					8.1084		8.8431	0.1161		-17.7704				-7.8533			44.0778			-13.3355	2.287													42.0395		14.6696
	146.596	131					18.273		-5.3418	-37.764		-0.9783				10.4554						1.1531	11.5969													27.9413		0.7232
	213.167	135.652					3.6862		0.8776	12.1837		17.8227				-32.3661						4.8367	-23.3941													24.5383		57.8074
	178.04	195.564					22.6237			-3.5255		19.9758				16.0332			69.7679			-8.8992	5.6582													59.5344
	236.213	214					11.8469			-19.4668		-6.9885				-9.8023			76.5536			10.0612	7.5995													9.389
	141.476	240.262					17.3074		10.7411	-7.0421		19.4298				24.2551			87.8737			13.3916	-8.8699													4.0957		67.6224
	168.672	74.9031					16.9247		33.375	-6.3622		20.5969				14.8814			74.9196			-9.5599	1.6977													32.0931		-28.6378
	146.471	138.588					16.3393		43.9196	29.2054		-32.6926				17.5051			85.4362			11.9566	6.9388													47.4375		22.6849
	87.2908	135.6					18.324		10.5548	8.8584		6.1505							-14.5829			9.9503	4.3176													52.3916		66.2232
	122.473	271.863					-6.7385		17.0204	10.6888		7.2003							120.909			4.1441	-1.7462													-3.1696		31.9375
		192.92					-7.1696		7.8737	-11.2934		-8.3227				-13.6276			-7.5778			2.148	7.5982													63.8827		32.0829
		163.179					-25.3622		-2.0357	-21.9668		30.389				-16.7245			93.4056			-7.764	4.6671													72.0867		56.0319
		162.26					7.9235		5.273	-14.9069		-12.324				6.3865			73.398			4.0612	10.787													44.9834		124.487
		149.425					-8.9911		9.2628	-10.5051		-43.0969				3.2895			65.7551			-0.5855	10.8814													59.5421		25.2551
		14.7666					-41.8903		-25.0268	5.3508		20.1148				5.9426			82.5102			-9.514	-2.7079															76.9311
		136.486					-6.5		13.5612			-44.9732				5.4694			51.898			2.2181	-7.7372															26.0778
		130.403					0.2538		-41.7946			-6.5051				-11.5855			45.9413			3.838	-6.3571															71.3648
		97.8355					6.1161		5.6403			-21.8406				5.8431			59.7117			8.625	0.7602															75.4911
		-9.3367					2.7946		15.0804			1.4821				-6.2704			107.966			6.3533	6.4528															41.3788
		124.492					14.2143		-1.0651			-30.1122				4.0204			65.2959			2.9541	-8.4209															30.3112
		148.559					9.1454		-9.3878			9.3878				-21.2934			55.6301				9.477															63.3852
		260.249					-7.9235		-14.8559			-29.4579				-6.9911			73.0625				16.7474															38.0753
		68.9145					-6.875		37.3788			-11.4298				5.3967			84.4541			-1.2003	1.1671															57.6837
		94.6237					14.801		-15.2117			-67.2602				1.5434			19.8431			-29.4439	3.0281															40.162
		79.051					-10.2844		-19.3967			72.8724				4.0548			76.4605			5.9388	16.4145															20.5281
		108.915					0.4337		-30.2066			70.9656				13.6135			41.6454			1.7168	1.2844															20.2245
		172.807					0.227		0.2156			25.8189				-10.4337			68.1824			-2.8227	16.6378															36.1467
		184.23					-11.7028		-34.3763			17.3724				-12.9362			81.6786			20.7194	0.3737															52.9107
		-40.6556					0.5612		-12.2296			-10.0255				-15.3138			73.2717			2.9107	3.0293
		133.746					8.236		-19.3686			-9.6046				1.7857			76.6416			-2.1531
		111.653					4.4796		-2.0714			12.2283				9.8125			76.7985			10.0255
		361.602					-2.2309		-72.3763			13.2793				-25.4962			60.514			-9.8546
		169.075					-20.4898		4.3839			39.6824				-0.5918			95.2883			-2.4936
		134.988					-1.7832		-25.9694			33.3673				5.2372			76.2449			-6.3533
		113.328					-5.8852		11.9273			10.5217				-1.4719			55.0204			7.0306
		221.389					12.5383		-23.4579			21.9579				-9.5702			110.379			0.008929
		123.791					-29.7156		-20.0944			-8.4452				7.0982			61.648			-6.426
		201.603					-8.2666		-16.75			-23.5281				14.1008			99.986			-6.486
		229.67					12.824		3.5026			28.301				-1.0421			84.7972			-13.1862
		176.938					13.8801		-21.4898			10.1569				-4.8929			77.0179			5.639
		344.541					-23.1263		1.1518			24.7309				14.7309			2.1033			11.2959
		104.932					-37.5753					8.5268				3.3763			46.6952			-2.4133
		148.455					28.2041					4.3355				5.7513			81.1199			-0.9464
		9.4707					-24.3954									-2.7972			46.7207			-6.7704
		166.054					12.9426									-8.5816			6.6352			-6.6224
		186.504														-3.639			82.9847			-7.4987
		112.114														-1.2538			56.7232			-8.8903
																1.5217			77.6122			-9.7079
																-16.2168			44.324			-0.7615
																-1.5638			109.971			20.1237
																0.6339			87.9477			14.5778
																1.8367			81.7411			4.1926
																2.2832			75.6071			-8.0497
																-6.6964						-0.7423
																5.4018
																-0.5651
																-1.6199
																-2.1901
																17.1263
																5.7602
																-25.7194
																12.5689
																-11.3087
																-4.6824
																9.2819
																14.9018
																0.6786
																8.588
																-0.5038
																-8.2972
																4.7717
																4.7551
																-8.5651
																5.6403
																9.0383
																-4.9273
																3.523
																-4.7691
																6.2245
																6.3814
																15.9783
																4.6964
																4.7755
																-7.5255
																-0.7551
																7.3929
																11.2615
																0.01658

## Sheet: EGFP-M18BP1
Fluorescence intensity of EGFP-M18BP1	HeLa CENP-A-SNAP + EGFP-M18BP1(1-1132)-P2AT2A-mCherry-Mis18alpha						HeLa CENP-A-SNAP + EGFP-M18BP1(1-140)-P2AT2A-mCherry-Mis18alpha						HeLa CENP-A-SNAP + EGFP-M18BP1(141-1132)-P2AT2A-mCherry-Mis18alpha						HeLa CENP-A-SNAP + EGFP-M18BP1(1-1132/T40D/S110E)-P2AT2A-mCherry-Mis18alpha						HeLa CENP-A-SNAP + EGFP-M18BP1(1-140/T40D/S110E)-P2AT2A-mCherry-Mis18alpha						HeLa CENP-A-SNAP + GST-EGFP-M18BP1(1-1132)-P2AT2A-mCherry-Mis18alpha						HeLa CENP-A-SNAP + GST-EGFP-M18BP1(141-1132)-P2AT2A-mCherry-Mis18alpha
	- siRNA			M18BP1 siRNA			- siRNA			M18BP1 siRNA			- siRNA			M18BP1 siRNA			- siRNA			M18BP1 siRNA			- siRNA			M18BP1 siRNA			- siRNA			M18BP1 siRNA			- siRNA			M18BP1 siRNA
	Experiment 1	Experiment 2	Experiment 3	Experiment 1	Experiment 2	Experiment 3	Experiment 1	Experiment 2	Experiment 3	Experiment 1	Experiment 2	Experiment 3	Experiment 1	Experiment 2	Experiment 3	Experiment 1	Experiment 2	Experiment 3	Experiment 1	Experiment 2	Experiment 3	Experiment 1	Experiment 2	Experiment 3	Experiment 1	Experiment 2	Experiment 3	Experiment 1	Experiment 2	Experiment 3	Experiment 1	Experiment 2	Experiment 3	Experiment 1	Experiment 2	Experiment 3	Experiment 1	Experiment 2	Experiment 3	Experiment 1	Experiment 2	Experiment 3
	301.922	112.828	13.4273	359.938	203.505	222.265	-26.1607	30.4158	-15.2372	4.3125	3.5332	30.7117	14.3227	33.1556	26.4324	3.023	6.5957	16.5574	18.7768	7.8865	6.0918	6.0281	1.9936	26.8661	57.3571	29.2934	-5.727	13.801	-28.1008	-3.7385	-6.8916	191.709	109.122	217.733	128.329	51.9222	-6.0536	-7.1186	61.9439	77.1722	91.0408	183.357
	237.546	140.119	-9.8495	245.842	127.96	100.884	-83.3878	7.8265	-60.7003	-67.5102	11.824	2.9758	-35.4643	27.6582	12.3916	-5.6135	-39.4821	-69.6837	14.1008	33.8112	-0.5421	11.3036	45.2296	18.0306	16.2207	21.8801	-24.1301	63.0242	-25.8291	-16.5982	-15.7181	185.86	117.25	168.06	154.917	143.337	44.0599	1.1352	110.446	22.426	-38.2895	92.037
	9.1913	134.094	269.603	40.4349	197.927	137.268	-5.8878	-0.5893	-93.7411	-52.5523	12.264	-10.0663	28.2551	50.7959	27.949	21.1288	128.219	39.0306	8.5	44.4783	5.9426	21.0829	21.4056	33.2691	20.3291	0.1378	-20.0357	-49.8482	-31.1837	6.7462	291.742	1.3814	107.088	313.711	117.189	147.04	72.0804	-6.3661	1.4554	58.5357	119.989	159.319
	170.064	577.997	276.759	253.964	221.679	266.555	-49.5	-32.2105	34.0242	-26.4668	30.0497	-21.5957	14.1122	32.4656	50.1276	-33.6186	77.9707	85.2066	5.8316	28.537	1.2589	45.8495	38.3648	43.0842	13.6148	24.2946	15.3457	134.819	-56.648	33.3482	-2.6556	228.196	138.422	283.686	146.227	116.485	64.9974	0.861	68.5383	28.1862	0.2219	3.2513
	279.457	127.413	138.898	172.043	230.57	277.39	-85.0102	9.6224	43.7385	13.0344	64.7768	10.9719	38.7704	16.5077	50.2819	8.2207	-88.8559	73.2832	7.6301	-0.4464	-25.7985	86.3265	27.8138	25.9503	13.9222	-3.6939	5.6046	1.3189	9.1199	2.0102	271.774	142.838	119.107	18.4056	173.175	161.125	37.3941	71.426	46.2538	9.9872	97.8737	3.1824
	313.714	153.466	16.2003	50.6556	240.358		-3.5038	-25.7105	24.9094	-7.9821	-6.5969	14.9158	-32.9656	30.4732	53.8138	41.6097	14.6518	81.5842	17.1735	27.1964	45.4707	84.4031	21.0306	32.2793	-37.5217	13.2028	19.6607	-135.931	40.7372	4.8788	224.048	267.93	97.8661	35.9528	134.392	130.668	-1.477	-3.2589	129.518	75.1212	76.125	95.8291
	162.513	42.9617	258.821	400.138	71.1161		4.6301	-18.2768	-23.125	-13.7143	35.0319	-38.3431	53.2666	31.8788	-58.7436	-5.1696	18.2474	40.1543	10.1939	59.1671	20.7372	55.3482	56.7283	-21.1594	4.6097	40.1722	-24.7066	-17.3546	-0.8304	12.2908	107.193	164.351	107.894	183.319	128.716	112.319	158.642	105.44	6.4273	32.1467	169.173	89.7028
	387.508	178.552	374.685	252.184	196.06	100.1	-75.1173	-41.6939	-92.0281	-18.9898	142.934	14.4184	70.9069	72.8457	64.0791	-9.8597	-0.9337	53.7526	-24.4401	5.9413	47.3814	81.4107	24.9056	-4.8763	3.4413	13.3878	10.986	-49.5651	-10.4936	30.9872	259.42	171.134	134.889	25.9566	203.245	92.2258	58.2959	73.5778	80.8444	133.07	162.172	83.0395
	224.04	199.065	31.898	189.658	263.25	365.62	23.9056	-35.1824	-14.0906	75.9273	44.3801	-8.1224	22.4643	4.1122	44.0689	45.1288	51.1237	62.051	22.7436	42.3176	22.3418	30.5842	41.0753	-15.1352	44.625	10.2717	-3.9732	-53.0446	4.5561	8.3763	8.5867	186.056	160.028	-25.0561	229.36	105.51	16.1135	-3.4796	11.5663	88.0651	82.9554	3.0153
	226.423	1062.64	285.533	-29.4031	260.078	176.406	-105.014	14.3941	-14.1556	28.227	140.941	5.5982	55.3941	41.7985	75.7526	-3.3112	21.5714	1.1441	6.3954	78.977	58.764	44.1505	40.5714	119.096	8.5128	-5.338	3.9503	60.8839	7.2628	25.2985	284.639	208.583	174.36	-1.0918	184.125	90.6913	40.9515	177.848	188.658	41.9834	102.559	52.5281
	236.524	295.343	257.397	376.292	277.019	110.076	-67.1288	-14.0459	-12.0587	-8.9043	7.8304	-33.8788	29.2321	20.8482	-4.4503	34.9094	33.1875	43.3724	9.0204	41.5421	47.014	0.7793	67.7003	158.999	16.7066	16.4681	8.6212	17.8622	3.9171	21.2219	217.166	202.735	106.32	-2.4528	111.201	115.579	81.8138	196.88	47.3482	46.8763	118.443	-0.6046
	139.226	358.856	9.5944	267.562	261.619	136.212	3.9196	70.3635	-14.1849	15.2679	41.0689	-68.4209	23.0026	10.4847	23.9834	48.6939	22.7844	-32.3482	26.102	31.3074	64.1531	-67.6008	1.6467	83.7653	-0.611	6.1607	-2.2143	77.4375	48.1033	15.6224	244.731	281.631	141.642	222.798	108.65	184.117	59.074	27.3469	111.228	31.7679	30.6173	104.828
	68.2844	8.4923	169.233	261.27	223.453	60.9885	73.7666	66.6786	0.977	-1.2232	-152.832	-76.0089	34.736	6.1046	35.3967	94.4732	14.7411	-91.3495	14.4311	71.727	12.0765	30.5638	-39.0395	133.548	46.4247	12.3265	17.8406	-53.1237	30.3125	15.5255	165.657	297.878	131.186	-9.2742	145.477	149.116	11.7283	17.4605	83.4949	30.8482	44.5982	4.1913
	374.584	255.073	255.762	236.185	198.617	8.6339	66.1977	47.0446	59.4094	52.1658	-110.165	12.8125	46.3125	2.8967	32.301	123.296	38.6607	68.8367	-30.4707	44.7105	60.1837	115.982	16.8648	87.2028	31.0638	12.1122	17.1977	-26.9515	57.4222	5.0013	64.9732	-11.6122	212.966	-14.0906	63.051	116.806	38.7653	80.588	58.2564	38.8495	161.814	-3.1314
	-116.573	225.355	-6.9298	-3.2398	262.889	159.842	56.1658	45.398	37.3941	27.4362	59.2219	45.4337	37.9426	44.074	45.139	-3.0051		29.4426	49.1633	47.9987	59.2066	19.375	-21.6556	28.8265	28.5663	3.0829	1.4566	110.004	-51.861	4.7819	203	345.401	208.399	177.712	162.335	140.509	26.6033	14.0408	79.9452	69.5102	79.8546	6.0179
	6.7028	216.693	213.05	-288.149	336.948	235.258	-17.9196	0.03061	16.7143	48.6569	-9.5753	-11.5166	18.0753	12.2117	29.2895	45.7143		81.7959	23.352	40.8508	12.375	1.25	-46.7309	36.5013	86.926	5.0102	-1.9362	12.4911	21.1492	-4.6964	245.888	155.796	142.133	188.134	265.137	56.5293	45.1454	81.4821	119.161	8.3316	-25.125	-2.7385
	412.393	-9.3189	253.917	136.87	-63.1046	49.7793	44.8801	-1.9298	30.7781	-57.6467	-3.9324	-24.6786	25.5166	16.4515	47.3074	56.9273	44.676	0.6594	3.9235	97.1913	101.213	10.2666	-1.7181	25.2487	12.1901	-2.5026	13.4477	85.2117	-18.1645	0.3878	4.111	139.11	153.228	269.768	139.779	144.709	34.3112	50.1429	37.0995	35.8316	232.097	3.5702
	66.273	199.193	210.403	-1.3074	245.917		58.4082	31.5918	48.8138	2.0918	-33.0204	-8.7921	5.389	29.0497	16.2296	29.1263	7.3048	97.5918	11.7028	33.0816	51.1594	157.042	50.7143	32.4503	-26.4439	6.3673	-31.7474	296.277	61.7117	8.8227	216.078	176.176	83.3648	464.482	-15.8036	104.122	49.5217	-52.5587	10.8214	42.4082	150.008	129.763
	120.874	746.663	196.237	139.061	312.867		-105.131	13.5357	58.3431	-41.5612	42.0179	34.8227	36.8597	-11.9719	28.2041	25	7.1913	29.4388	6.2028	26.8291	91.9401	44.7105	145.702	62.7602	20.6084	-37.9528	-5.0702	-9.3903	49.4031	1.7959	191.415	222.691	79.5702	-1.6747	208.788	0.8214	44.9349	80.125	5.8533	46.1709	77.352	132.216
	246.889	167.52	448.853	237.703	572.408	83.361	37.0957	9.7628	-127.055	-40.3865		48.1671	22.0638	35.0561	-9.2781	32.7679	58.0536	75.5702	24.3061	-0.3673	33.2551	40.5	0.838	78.3176	-17.4872	29.0255	2.5459	7.7577	41.2066	-2.861	234.059	223.001	76.3584	179.409	259.466	82.4286	83.1212	70.3941		58.6633	143.536	113.158
	223.256	297.026	241.015	17.3916	259.381	194.571	55.051	-16.9758	84.375	-2.6033		-46.7934	-22.7717	1.2015	28.2934	-36.2972	-10.0344	-4.3839	49.1862	29.6084	42.5281	73.773	14.0497	-35.4694	-13.5765	-27.449	-21.8355		15.5357	36.6429	13.5944	10.9528	98.4324	125.938	148.918	123.764	27.4477	91.4388		3.6403	153.487	45.8788
	202.204	6.1467	127.94	412.654	151.254	0.8036	124.693	19.0153	53.1531	10.449	12.2934	36.6301	22.9184	25.1556	52.6161	29.6161	68.176	-69.2258	-18.9196	12.4324	50.7423	10.3788	21.7347	-17.5548	-22.2398	-16.6569	6.7972		22.6365	40.9719	239.682	230.296	110.42	-1.7372	119.403	123.184	37.7258	102.911	129.022	149.459	107.068	123.552
	12.8495	216.579	21.7806	207.01	-121.102	76.4834	39.2997	26.9809	39.0128	-3.3329	-22.6224	29.6531	14.7334	7.4056	33.9464	8.3061	103.668	51.8622	27.3431	41.1186	113.764	56.0434	-0.03061	66.4732	41.8776	13.7309	21.5459	3.4043	32.6888	-6.0077	214.134	115.504	4.0753	221.062	170.094	69.1097	51.7321	74.6773	133.348	61.2857	109.185	89.3444
	148.575	299.047	206.756	12.1084		36.477	49.9962	-48.352	-1.7181	-35.3967	-50.9464	5.0051	61.7908	13.2258	44.3686	120.149	24.9413	53.4809	16.6658	41.7666	83.3967	52.4401	48.5026	46.6339	16.5918	16.8967	7.023	-9.6365	17.1327		-1.6862	185.157	119.551	228.975	177.708	121.61	-5.2258	93.5816	262.328	74.4477	205.835	82.7181
	126.079	295.526	-4.7819	216.041		107.668	59.9872	37.6314	32.9464	-38.6875	61.7296	-13.6543	16.0242	16.7105	37.7423	19.6199	22.6008	181.397	5.4235	37.3941	57.8202	33.2755	6.8304	28.0893	26.912	17.6314		-38.8074	-67.1263		8.3355	165.839	133.703	-8.0587	192.133	121.46	167.315	91.3495	50.1569	64.7041	348.795	9.5268
	21.4809	175.768	168.205	160.894	243.561	-261.074	75.6505	-0.8508	60.9452	-5.227	10.1327	14.9834	41.7219	55.0064	10.0344	10.3355	21.9974	55.9579	68.5293	57.0293	50.963	14.6837	25.0561	56.8559	10.7934	1.2092		-146.407	62.7602	-27.2385		260.171	118.408	53.7806	143.295	136.542	60.4286	108.561	11.9617	110.358	136.153	74.9056
	220.233	202.403	111.792	267.895	248.577	106.945	148.497	5.0191	43.5281	-14.9898	49.8546	12.2844	19.8648	-1.6339	26.2474	36.0242	15.5077	111.357	21.3367	26.3214	109.871	91.6135	-19.6084	30.6645	32.8788	31.2628	-18.0459	-24.9579	80.3954	10.9579		7.1492	141.226	268.522	174.365	63.3418	60.8673	86.7704	104.45	60.5293	137.417	141.509
	120.49	133.727	153.19	181.233	122.554	91.3227	69.213	72.6977	-101.106	12.8916	8.3546	53.0536	48.3571	9.3393		73.0906	35.977	71.1684	21.9796	74.2411		136.022	13.6773	57.736	-8.1161	-8.2679	-11.1913	25.0944	30.8163	12.6582	189.541	206.176	167.273	3.4362	118.571	161.458	43.3355	183.876	55.3763	51.574	13.2054
	154.723	542.2	178.203	289.986	126.629	104.074	29.9719	29.1837	57.5791	-0.9923	-8.1773	-6.3023	-29.7679	18.4503		14.5013	29.4375	-32.2513	12.7513	67.7041		59.7934	-5.9401	73.25	9.4031	-4.0523	1.5612	42.6658	61.0829	21.1161	2.2015	255.765	108.218	202.38	237.983	83.0561	16.5523	136.786	34.7602	33.9362	227.145
	-201.207	280.277	221.462	219.745	191.129	172.131	-112.659	39.7551	71.1709	23.2793	14.6224	-0.8291	-14.9477	25.0548	22.2921	3.9184	53.8878	36.4158	22.4796	14.514	13.1276	66.0485	144.841	-55.0765	30.8814	11.5281	15.6008	-128.568	63.8406	-23.3814	211.852	251.341	57.3125	171.293	220.972	78.7436	53.7003	84.4222	-64.4949	30.5191	29.9554	44.0778
	16.2258	229.304	3.3342	276.74	192.802	63.7946	-35.6696	33.8686	22.6416	-29.9745	21.1926	8.5395	35.8176	17.4069	8.1467	-2.0855	32.7883	120.754	63.4311	37.25	13.1658	78.7806	32.7577	42.9668	-12.5765	26.861	0.003827	65.5191	19.1658	-2.7194	7.088	476.033	166.189	-145.689	146.425	135.207	76.014	99.2092	159.505	17.9719	234.253	80.8304
	-18.6416		-2.7449	265.249	88.7194	117.989	57.7015	-16.1556	35.3316	-91.176	20.9273	61.1467	51.9094	21.8355	32.7092	7.1237	8.1735	77.1798	71.1926	21.3584	25.3036	46.324	6.2985	48.5293	6.9247	5.4311	-6.5102	-53.5357		0.07015	286.315	403.008	68.7181		139.704	117.372	73.8087	99.7768	112.75	24.7908	121.994	57.8418
	362.397			369.899	191.269	73.8788	-4.5523	23.8622	79.7054	-26.8941	-15.8814	-32.6059	27.5089	19.6288	-9.3724	6.7972	-4.8304	2.4196	40.773	9.8916	18.6786	52.7219	51.0357	92.3763	31.5255	7.9515	-0.4617	-122.277		20.8023	204.512	240.606	88.8112		78.736	146.634	66.8699	158.445	62.551	22.0804		28.4337
	144.306	195.223		169.25	1.9605	26.2857	-2.1276	27.2372	-7.9184	2.7691	-12.1901	7.2028		5.2589	16.3304	22.6964	-2.6824		-6.4031	80.5982	29.6161	141.714	109.284	17.0753	-2.4503	10.773	-15.5561	187.434	22.199	13.1531	132.094	140.457	-35.4362	-6.7474	240.839	128.008	52.8125	147.828	3.1671	73.4018		70.3661
	172.004	243.242	100.299		386.005	106.19	11.6212	-5.2819	33.1173	-27.2895	-39.9464	0.9681		23.0587	26.7181	64.5816	11.8291		8.1607	40.2985	28.7819	-25.2449	19.4503	24.1441	-31.5446	-54.8622	-3.3291	-90.8189	4.6556	-60.5727	8.4566	222.314	144.742	4.8444	190.767	145.853	97.8355	142.272	0.338	24.1186	68.0128	129.008
	183.611	150.027	0.08801		312.059	95.3151	-78.3253		82.7398	-29.5957	25.1186	5.5842	4.8992	-4.5612	14.824	21.8597	11.4094	9.023	23.037	52.5497	16.1849	33.2041	55.6492	113.342	29.5944	-62.2143	-17.375	-266.537	-39.0191	40.9719	202.469	166.005	10.0536	252.603	113.818	105.282	61.2819	165.533		67.5446	75.9681	110.325
	223.356	178.264	137.807	245.653	135.469	83.7844	1.8457		63.0306	-102.154	9.6811	-5.1276	3.6518	-10.4273	53.9579	23.102		17.2334	21.9605	32.3304	41.4987	81.4286	13.6403	78.1403	29.7117		-1.6161	460.189	-40.9707	64.074	282.091	216.875	173.593	256.195	164.449	162.467	59.6429	117.955		48.5651	44.0344	81.4439
	152.029	144.656	56.3074	222.272	-192.753	109.189	-3.6824	0.04847	71.8648	-14.8023	3.9592	16.9426	11.7436	-0.4018	32.8393	21.8061		76.1811	20.088	39.5612	34.7334	82.3265	-38.5293	159.21	17.6365		-15.5855	-114.431	-11.75	71.4235	158.855	187.633	7.986	168.642	106.761	164.24	75.375	71.699	68.0319		97.7513	-44.2232
	135.305	315.712	145.497	201.175	44.9745	115.753	40.1416	-51.3673	31.3265	60.5893	25.6467	-29.5982	-0.8508	19.1913	37.2066	44.8151	7.7207	88.7334	31.6926	36.1212	57.8661	74.5523	28.3291		18.3852	6.7168	-9.2615	204.476	10.1786	20.699	317.003	196.352		27.2347	241.408	75.5485	106.458	192.537	108.023		-2.0459	75.6161
	80.3265	8.273	150.457	31.0383	124.554	111.103	-100.29	27.1862	31.5816	21.6901	9.5357	49.3329	24.5268	32.4018	-31.8125	62.1684	8.2615	59	19.838	-44.2577	38.7385	7.4043	48.1518		29.1811	-7.0778	11.7219	94.2985	-12.0727	-7.6467	225.996			67.2385	131.297	131.238	167.435	252.696	186.973	71.0434	23.0191	9.7755
	221.251	86.2385	103.964	209.985	106.508	91.8776	-26.213	18.8074	21.301	8.7258	25.5281	23.5638	11.5446	-2.4566	30.4719	33.3189	-9.3916	65.8673	59.4758	36.5166	36.8776	68.699	-6.6531	11.0395		17.3712	6.7385		3.2117	57.8814	5.9605		42.5306	141.968	88.5242		38.4311	89.4872	118.274	87.3469	51.8801	171.111
	208.255	137.585	128.367	151.977	203.605	138.719	-19.2972	9.7309	37.2347	-20.3048	17.3597	-11.6097	139.879	-0.9094	52.8278	22.9732	-1.2768	41.2041	45.7768	32.9056	98.5357	35.7653	16.5651	13.8074		11.8878	34.2793		-41.8214	-6.7921	3.176	218.784	222.26	39.0115	60.8074		82.6926	104.26	201.922	-12.3202	-0.5561	47.2372
	1.9362	115.312	17.301	211.725	222.1	105.699	85.611	47.0651	8.4069	22.4362	24.2003	-30.5281	-12.8061	23.3431	37.0536	3.9796	19.4273	55.1684	35.9898	50.4043	37.2959	38.8941	111.899	45.5906	-8.9477	21.7538	-19.9592	-18.2054	0.1199	24.014	4.6824	69.9171	173.828	146.258		2.4668	97.4311	149.413	134.686	4.3801	37.4732	48.2347
	5.2577	212.909	8.9388	136.402	160.874	94.7309	73.5255	-74.5153		49.5319	17.0587	-4.3712	49.463	12.264	27.4554	31.5102	21.4783	36.9503	79.2398	10.0702	-9.8878	43.4783	3.287	7.7819	15.2551	2.0179	-19.574	28.2372	-1.9388	59.5638	245.68	132.432	201.464	107.994		96.7755	80.1773	104.835	164.188	142.3	45.176	62.2054
	19.2219	269.366	215.691	28.8712	293.925	7.1901	9.7181	28.3967			29.5306		130.242	0.9375	38.5319	-25.9235	20.3941	89.6441	29.2028	84.6582	48.4707	68.8865		63.7462	-12.0791	31.588	6.75	3.3151	14.9222	94.1352	164.702	107.525	141.562	99.7232	4.0089	106.519	155.77	75.8048	244.449	9.8865	7.773	-59.2117
	7.6773	250.457	277.459	320	66.8648		44.9987	31.625	-17.1977				194.647	4.7385	12.7551	37.2577	-23.8584	25.9209	1.727	-2.0676	49.1645	69.0931		-11.963	23.0179	8.6046	-9.0128	-3.4847	-15.2117	14.2844	136.863	117.264	184.833	14.574	1.9349	119.834	139.431	-195.699	98.9528	72.1301	70.2423	80.9031
	11.4758	45.2054	127.514	180.597	301.356		23.7921	1.0651	-13.5599	-12.1097		-36.162	115.601	10.0804	38.4286	-1.0523	11.1122	35.8138	11.6161	18.8087	48.1339	56.8622	34.713	54.2883	15.2538	7.5459	-6.4885	-7.5268	-16.5357	2.2245	6.0153	89.1173	165.321	115.642	95.5612	20.824	96.5548	227.923	172.455	81.3189	65.9707	35.9145
	19.2474	151.662	95.8559	177.101	520.307	206.022	-1.051	-4.6696	-73.3418	11.2117	3.3304	43.6492	72.8533	8.0268	45.6875	-69.9656	25.5472	42.0497	19.2436	52.2054	20.5944	37.8827	50.125	52.986	-2.1684	13.9936	-17.3992	71.5842	61.3967	45.9566	145.685	67.5166	181.932	116.644	104.77	157.019	109.453	106.208	256.631	57.9158	74.9094	105.482
	6.102	219.265	168.675	131.514	112.939	349.884	-46.986	8.8763	-13.9528	28.9171	-4.4592	-40.2679	-58.5255	18.4452	18.7513	10.5357	19.736	48.736	37.0599	40.8278	18.5918	72.6569	47.0115	-20.7258	48.0548	19.4796	-47.3839	4.264	29.7156	43.7487		94.0166	174.999	289.932	58.3852	-0.9298	122.765	162.468	166.969	120.677	5.8916	102.439
	148.545	288.093	136.56	576.173	199.284	55.3814	-33.7959	0.4566	-62.3597	9.5599	-19.477	11.301	83.6977	-0.3112	57.9732	-2.6454	26.5663	-5.6811	77.8202	6.5931	56.8061	56.986	37.0995	99.986	-2.1569	6.6747	-10.2589	-66.426	18.477	26.4171		-76.2883	0.9401	83.9209	4.6339	341.48	91.6339	165.959	10.8087	27.6633		111.089
	166.858	155.157	143.932	359.056	89.2411	347.407	18.9362	17.5038	3.0663	-12.0867	12.9247	-81.0395	65.5497		14.1709	-6.4107	10.7398	39.1263	15.4681	11.2679	25.2309	73.5855	-52.5383	29.7602	10.5306	-24.8278	-18.3571	-47.0612	6.8048	24.4707	-36.8992	94.5548	1.6454	80.8253	143.108	102.227	134.73	99.9196	139.311	52.602		81.2551
	225.025	164.018	0.3151	221.562	25.0995	145.681	-79.764	40.852	48.9668	30.0753	-75.1492	18.8074	65.6454		36.7717	46.4694	41.1875	20.9337	67.9847	-7.2474	17.2577	70.7628	67.1008	9.7105	-6.9043	14.0408	0.1237	-134.473	18.2105	9.3342	233.744	82.6314	4.6122	71.898	6.5472	175.48	110.492	381.486	147.698	69.2997	-8.912	105.434
	108.319	209.083	34.0867	36.4987	8.9554	667.247	28.5638	12.0778	-29.4809	32.1875	15.1122	27.4719	-12.6964	27.1288	33.037	100.076	25.9171	36.9592	53.2883		35.8597	56.1403	-27.176	22.8827	-12.2436	15.7615	-0.4031	-124.878	8.7156		222.977	84.8469	189.732	65.9987	21.1913	160.982	106.997	41.102	214.33	159.92	1.5242	58.7895
	184.466	49.1964	124.582	320.429		314.596	19.6378	30.3023	7.7411	10.5128	29.9515	10.3061	-21.699	11.3584	55.7092	25.3291	31.6722	-24.6824	5.1811		-12.2628	69.3355	157.703	29.5791	30.8763	33.074	6.6416	33.6339	3.5523		215.176	142.866	73.7883	137.074	162.911	47.861	87.9133	117.932	335.561	95.7207	56.9694	88.227
	187.494	13.8304	123.295	242.833		-174.598	29.7398	-32.2219	-5.7934	18.4936	48.9668	-29.8304	47.7066	48.5472	34.588	125.608	8.4362	36.5383	97.014	27.5893	-4.3112	6.4936	28.5599	42.7385	29.9923	22.787	-22.1059	-43.1199	-3.0906	19.4145	170.161	-15.8661	186.982	127.569	180.992	72.0587	115.797	229.06	215.342	69.2168	85.1352	42.0663
	102.594	128.468	7.6735	278.407	-4.0344	175.855	69.0778	5.0599	0.8202	48.8125	-4.9503	-13.9809	107.628	91.5395	25.7003	87.5778	5.6531	42.2462	46.1224	12.3189	15.8316	-1.574	38.7296	8.3316	-4.3661	3.6684		17.8878	22.8355	1.4579	230.74	100.968	164.089	114.819	106.385	91.3597	75.1505	102.719	47.0587	57.0651	234.738	17.3023
	408.022	222.717	141.263	238.913	501.061	235.671	-26.7194	57.8227	-39.1416	40.3265	24.0714	-24.2117	10.5778	69.9401		33.2679	15.4235	37.8852	50.4464	25.8163	67.0816		76.5995	-28.0306	-18.8967	-6.324		167.645	34.5829	56.3699	191.653	71.7411	297.911	-18.426	117.793	103.258	321.696	29.6531	134.888	45.5064	-90.2232	98.4707
	198.607	167.264	112.633		138.597	247.99	23.8827	-30.1008	-59.0434	27.9005	-4.2258	21.9656	120.51	45.0612		85.4579	36.0727	30.5332	72.9668	42.7793	29.4247		55.6097		15.9847	10.6288	-13.1798	-28.0778	-1.648	19.3495	139.263	158.441	123.471	193.439	61.7411	146.403	72.8304	176.911		21.1492	69.4872	100.796
	120.49	237.32	58.6773		128.579	264.856	24.4439	15.2857	-23.2742	25.5497	39.1645	1.6824	23.2832	-51.6696	45.3304	48.8801	35.8342	46.8903	60.1696	36.8074	49.1658	-6.7232	5.4349		5.7449	35.1416	-16.287	26.7423	64.5638	-1.4222	195.48	79.9719	199.219	43.051	32.5128	161.23	117.239	93.8291		37.3801	203.173	94.8291
	58.9974	88.6747	139.569	68.7717	74.5013		62.6824	2.6786	43.0497	23.9707	9.8291	-49.5013	53.412	71.1837	-80.2245	65.2679		55.9821	80.3202	118.996	56.0638	5.6186	52.3584	-4.8724	8.4885	-0.5893	-7.3074	45.6747	46.2895	-9.6913	213.696	106.62	159.753	110.754	136.35	185.39	112.801	140.603	-1.1569		72.3304	124.79
	-12.3597	434.082	196.3	142.242	141.957			-1.6633	18.4056	4.324	44.1008	35.0357	73.8941	46.4375	53.8469	49.3036			32.1531	-10.3406	29.9337	19.1148	28.6837	87.4707	31.5625		-8.8559	-20.3036	15.9681	1.8865	176.133	100.107	223.823	204.175	140.887	6.0408	116.864	57.6008	83.8457		72.8061	80.2168
	232.597	-10.1569	29.6556	109.936	139.097	565.055		53.8533	44.7296	9.7321	-22.8202	36.4286	4.6135	124.04	-6.3329	82.6467	79.1046			25.8214	39.0115	-0.5191	52.6862	35.2883	-25.0842		-4.4592	43.2436	8.7398	34.3457	183.195	111.404		206.903	162.802	-5.9184	95.1429	108.714	50.7972	90.0944	-95.0931	145.802
	172.966	142.125	141.931	49.125	200.617	386.58	-6.6339	-26.4337	10.8202	27.6276	35.4273	3.3367	87.0523	20.3495	20.4286		59.3559	71.4349		51.2615	27.2717	16.8406	59.0128	41.0319	37.523	-1.4043	13.3776	61.1084	41.6429	7.2436	-8.3495	103.528		88.213	-140.292	82.9082	9.301	111.941	74.2895	101.218	46.3393	112.304
	181.464	234.471	105.291	94.1901	74.9375	397.823	20.9273	1.8457	45.0625	16.6403	14.4911	21.676	52.9974	148.744	83.5625		77.7589	60.8189	45.236	61.1186		33.9452	57.5268	57.1008	10.0587	-5.1531	20.139	17.7003	-10.9515	20.889	229.912	81.0561	94.5166	141.663	-0.9452	115.326	205.051	108.3	88.4362	17.0931	256.894
	98.3393	67.9413	110.639	90.8661	282.754	266.702	-26.4719	35.4962	-9.1212	17.4796	24.9337	13.3316	82.7832	36.2232	12.1135	-2.176	64.4043	-1.426	40.6543	24.7513		46.3214	32.9821	32.6773	16.3763	5.986	5.4413	19.3355		42.0102	205.897	123.946	85.5281	210.828	160.79	6.4337	97.1199	172.37	54.4872	86.4923	76.4018
	234.939	261.861	28.4426	137.466	200.946	232.283	-8.9834	24.4324	58.2921	-45.699	33.1747	-54.8291	33.5344	136.237	58.676	-117.046	76.5191	16.7742	35.5893	104.858	64.7105	58.7105	41.5268	10.5906	-11.5026	18.4745	4.4273	52.1467		23.0689	281.099	180.168	143.707	101.74	8.3214	88.2997	85.8571	129.6	73.3495	48.1033	80.6505	43.8099
	190.875	213.034	111.825	70.2768	173.181	287.061	-9.6148	47.4184	-24.5855	-10.111	10.0842	-29.838		31.9005	132.245	66.1556	14.8852	1.1365	45.625	43.7309	36.6518	69.2347	27.5536	43.7436	-21.2092	6.0676	1.8125	20.301	-8.7666	17.7704	-19.6696	155.093	127.708	101.255	172.009	196.21	100.562		148.719	75.8278	116.963	32.9388
	17.9987	244.236	85.9541	93.3992	73.7105	393.982	28.3202	25.3061	56.9439	36.9031	52.0651	43.9668		91.3661	45.7423	237.633	40.7054	7.6849	34.9196	40.8827	28.6658	99.023	58.4745	22.0855	15.5638	30.2296	12.611	89.2079	19.213	5.4592	254.043	84.7704	139.458	15.8112	81.0051	94.5128	142.387		14.3367	119.764	129.019	75.8367
	172.235	284.292	81.4043	57.6224	200.982	626.009	-19.1607	-2.0561	40.0816	-37.0676	47.2411	5.1224	-19.3699	62.3176	67.5217	82.8087	27.227	39.3418	49.8929	41.4375	68.2768	2.9668	55.1301	11.2538	31.9515	43.5153	31.6033	16.838	18.6173	-48.7972	296.596	88.1199	70.7538	87.1429	8.7015	103.472	50.4069	-2.6964	-13.8355	105.537	77.5765	-2.4732
	65.6607	178.96	77.8087	118.926	118.514	7.037	-21.9043	29.4452	-23.1199	-9.4247	51.6862	33.6939	-3.736	39.4783	-2.4579	52.6454	62.4707	20.9247	39.977	71.6862	45.7334	34.8584	36.0332	97.4847	9.6901	-9.4031	25.6735	-22.1135	10.1416	21.111	297.721	122.864	121.946	6.4885	93.0344	102.028	68.023	10.264	129.839	86.4847	18.6505	63.6288
	1.463	237.385	81.3584	78.0638	214.617	82.9566	-12.7513	40.0255	-6.3584	-43.9158	11.824	34.9579	-20.6135	59.0293	55.0587	2.4401	69.602	4.602	30.9719	-42.9643	72.8367	28.9783	46.4158	136.571	11.0166	-34.4273	12.8253	41.3495	13.5663	2.6327	231.269	98.5128	135.585	0.8508	156.137	113.644	125.421	43.5191	93.8801	51.625	93.4375	125.763
	183.628	357.413	61.2028	10.4094	148.611	361.851	-2.9273	-3.6569	10.1811	-14.6582	32.1454	-6.5306	-12.0753	-74.1531	72.7258	10.6684	54.3367	28.361	42.0293	47.2283	102.747	69.1008	40.2806	111.446	3.5714	-4.824	34.8559	7.2806	2.6288	30.0395	173.79	109.574	126.309			71.9031	80.9617	88.5051	96.6594	188.619		89.7997
	194.96	180.523	11.102	149.387	87.2028	96.2462	12.4783		33.5332	21.2857		11.8559	-29.463	91.6684	52.6556	28.2283	46.3967	38.8163	103.688	79.1148	63.0842	82.3763	-24.6837	67.3546	20.7015	19.9783	5.7219	14.4056	-7.0191	18.801	263.432	92.1862	128.041			113.3		56.2513	28.0842	19.7041		103.532
	164.744	190.358	53.8125	162.986	168.014	315.245	7.0561		-6.7385	-22.9337		-4.1709	-76.537	59.0829	36.9324	0.6441	33.0612	74.7972	69.0867	57.8214	67.4375	67.1939	93.1263	139.948	10.0714	-6.2372	6.9936		4.9885	30.486	321.676		197.161	246.004	301.233	76.9018		152.872	86.6224	80.0485	101.737	149.79
	-0.4592	363.238	6.375	92.1059	-95.449	252.338	12.2666	13.7857	24.426	-18.5714	-7.6339	13.7691	74.8112	19.0523	10.2003	69.9235	5.2742		135.18	66.8048	70.1008	43.9464	-38.4043	69.2768	12.2411	32.2564	7.5217		7.8278	32.3202	254.225		141.12	121.21	251.232	132.509	98.3801	123.399	-5.8227	87.8929	60.1684	-49.7309
		171.927	46.9401	114.858	143.744	1025.09	13.7602	10.5319	-0.5804	16.014	-3.9005	20.8202	82.0918	27.648	39.1046	53.1084	92.3788		45.324	57.1288	121.153	-21.4758	29.4005	20.6722	25.6314	21.2538	3.949	-25.5638	19.4107	-2.0918	191.832	216.159	111.876	106.967	117.635	76.0753	181.903	97.9056	14.7717	35.2755	104.634	82.213
		243.964	72.3776	108.497	-67.4464	40.5829	18.2819	23.3533	-4.7781	-0.2334	4.1365	14.3482	55.764	86.5714	12.7513	74.7551	73.3992	2.5944	35.6862	32.5702	74.852	21.6403	51.5918	78.199	8.8048	2.1263	30.949	34.5128	-4.727	5.1798	9.3393	271.94	122.885	64.3329	126.376	136.246	254.219	96.1964	14.7309	91.9413	90.0689	99.0982
	-4.0702	159.353		75.8533	241.056	6.9592	16.6696	-3.6543	19.7347	6.9005	41.2347	-8.2972	9.0829	62.3597	21.574	63.9388	-46.0753	37.6607	11.4056	38.6543	44.7781	26.1901	63.1161	47.1747	-18.7245	17.5383	10.9936	4.2372	-1.7321	33.398		80.9311	119.716	97.5459	184.21	-7.7857	67.852	0.2245	54.2411		58.0153	53.125
	289.112	224.747		84.7105	306.39	371.01	45.676	34.3265	19.0332	44.3023	3.6824	-14.6416	70.4592	15.8827	0.04209	55.2985	60.6735	4.0408	63.9681	82.1913	53.4145	51.3737	59.9681	99.9987	24.3954	10.2117	13.6339	12.6658	21.5102	-9.0918		173.663	122.096	218.663	195.681	185.958	403.309	98.1607	141.05		143.897	100.973
	5.0026	293.416	5.0128	130.815	172.39	628.277	-36.6033	-18.1237	-9.4439	-77.1212	19.6849	-12.3546	88.9949	84.9158	48.5867	64.3546	43.8584	-45.3291	6.2946	0.5995	35.5753	36.1939	41.2232	73.0548	-5.1658	-6.0051	7.6837	-104.973	25.0969		-4.5727	206.844	194.335	118.486	253.52	254.009	205.557	89.5038	90.3431	-0.4375	125.277	128.744
	285.834	-4.4388	98.963	159.071	161.665	324.523	3.6084	15.0344	18.4324	-10.3954	16.7615	36.7895	70.2283	53.5842	18.148	25.1824	17.4056	14.3163	88.0638	44.3342	47.2372	0.2526	72.4298	75.0765	-16.0217	22.051	31.5663	41.4337	47.3087		122.176	207.835	104.987	86.9885	419.024	33.7819	191.936	38.3903	139.85	8.2066	52.1633	70.713
	125.509	260.686	64.0804	112.185	125.689	471.724	13.9005	48.8546	15.2487	85.2577	36.5115	-37.051	75.0753	54.9145	15.8865	60.7691	14.5957	26.2704	53.6913	26.9681	64.6913	67.5179	33.1097	104.21	10.6671	-18.5663	34.1875	8.8559	4.6633	11.0982	75.824	232.718	-5.0434	111.951	172.473	195.361	238.679	84.6505	131.772	17.1429	68.9426	49.875
	95.7742	211.144	128.753	91.9528	112.001		-21.7742	29.3661	-7.4911	-42.9809	-12.9401	-73.7793	45.3342	33.088	17.7526	85.6008		42.5816	53.2564	98.8571	80.4732	79.0829	66	22.7219	7.227	3.8482	5.8176	276.682	-58.9592	-56.3138	192.782	671.684	82.611	121.814	373.728	67.1276	183.301	168.96	70.4298	10.9477	12.2742	60.0446
	-7.3265	242.137	-62.2883	100.587			27.2704	-26.287	-1.3023	-10.9477	47.426	1.9541	58.7283	24.8202	3.4936	72.6926		29.0115	12.5395	40.1122	108.417	59.5191	48.0561	33.2972	-30.5867	0.2398	30.2806	66.1696	-41.3457	-30.3278	208.577	88.1059	224.069	149.008	260.693	84.9758	112.542	181.02	101.65	10.6543	120.24	47.5753
	144.159	273.895	157.047	71.2602		121.774	0.713	60.7462	48.1518	15.2117	19.6097	17.6875	81.4783	21.6454		103.185	4.3661	46.1875	-4.3584	19.3533	73.3291	22.9515	-0.7666	69.1901	36.7934	3.3138	35.6173	30.1365	-14.4426	-43.1237	8.639	197.167	125.943	106.486	420.355	115.217	181.955	107.489	82.1071	12.0191	22.5714	54.5179
	587.239		190.506	103.506	112.102	103.076	19.5931	72.0587	-21.4158	25.1046	3.1569	-123.297	-20.6186	5.9592		9.2793	74.2577	88.7666	28.8954	-15.6824	42.1543	42.4388	6.4923	79.6582	32.5714	-13.6556	-11.4388	12.3329	32.2908	-7.4452	237.972	228.309	117.875	89.1645	-19.727	109.232	230.768	85.5421	10.0829	18.2615	95.4069	33.3495
	462.439		157.759		51.2883	24.9592	6.8176	30.3992	2.3852	-55.398	3.7398	54.1875	86.9349		41.4439	17.1696	-23.7334	51.6837	-48.7857	51.0867	58.2742	15.9464	1.338	51.2054		2.0727	7.949	10.8214	25.3278	28.0906	19.3839	351.49	99.0434	207.731	360.247	-55.2997	157.255	128.622	-0.477	142.244	71.6059	44.588
	224.115	258.113	142.875		71.25	34.2258	6.1135	32.0599	-21.5855	36.8418	4.0893	-22	46.963		28.2985	72.7513	13.1276	35.8431	17.1556	44.3495		81.0842		65.4477		26.5651	16.2207	75.5306	40.514	9.4273	196.941	419.783	180.098	88.9796	378.392	1.1008	202.028	61.5842	10.9605	33.3763	41.5842	10.5038
	471.403	252.409	205.333	5.2092	117.562	108.057	33.986	-10.514	28.6122	25.9375	-12.0842	45.3291	69.6416	44.6416	37.9031	137.129	-25.9082	11.5102	56.9324	21.4554		38.2564		49.7628	-15.977	-9.2921	-25.4656	12.5153	-47.6811	-11.0268	173.397	136.649	56.5957	162.069	296.131		94.5408	65.3686	1.7704	-23.4349	140.269	30.0395
	291.079	162.506	17.2449	165.034	71.0523	125.311	-2.4515	24.7934	20.6033	20.5574	31.1008	36.5561	-32.6339	0.3457	87.9222	149.022	48.3214	27.2462	-15.8712	-11.0778	-2.8099	54.3916	6.9133	-4.5485	8.3253	10.6467	19.449	8.8163	10.625	44.7398	182.375	193.01	11.861	121.51	195.398		140.577	142.955		135.139	76.7526	42.1492
	198.436	143.661	33.7768	86.5051	105.8	58.7806	9.3776	-8.9605	2.2628		-1.4311	23.0306	28.148	45.6148	41.6926	-11.4617	11.4452	36.5804	36.4388	13.7168	4.9133	-1.6594	47.7449	84.4145	-9.9872	19.4936	21.7972	150.61	17.1046	11.6071	75.4145	181.441	124.295	243.955	348.353	155.314	85.9094	104.962		62.1594	40.0038	12.4566
	182.804	-208.773	4.5969	18.4337	35.4911	118.44	17.0242	-0.002551	4.0663		26.6786	66.3763	50.0765	1.0395	23.7908	6.051	41.0446	25.8457	-16.4247	11.0982	38.2615	46.2691	-14.227	46.4949	9.2436	12.2717	30.5459	16.8699	19.0179	21.7194	149.912	166.863	119.292	170.071	596.395	-5.3967	190.48	74.3533	-4.1849	198.681	25.7258	81.8138
	219.649	326.991	134.102	221.844	56.6671	170.635	-15.75	13.9413	-5.4311	-20.8827	2.6276	-11.8597	72.801	53.1416	32.8916	47.4783	44.9898	20.8342	35.6276	56.8099	19.5026	33.1658	-53.7589	56.8827	-1.9082	22.2347	38.8265	35.1301	5.2564	20.7245	196.565	254.712	140.668	186.967	41.8878	142.078	254.745	74.5599	65.8393	71.0472	131.179	22.3316
	191.639	131.416	18.8061	1.7615	80.963	-4.5714	-11.7908	7.7666		-25.162	32.2321	-16.6263	95.1186	27.9094	29.4375	133.54	53.9936	55.3214	77.9936	50.3648	-0.4235	34.0434	55.5893	141.435	-6.4694	-1.8992	28.7003	61.1684	-3.5842	27.8992	68.139	228.12	113.912	3.699	208.529	117.339	117.846	73.4592	68.051	140.297	41.2283	148.452
	322.139	203.191	137.645	-20.0944	76.889	144.065	12.514	-33.7207		-2.4094	22.5332	37.5842	53.4388	12.2666	52.6671	38.7258	27.9375	1.8329	58.4719	73.5472	7.6747	54.5102	2.7972	-29.7832	-14.0829	1.9069		-5.7997	-21.463	25.2474	-0.4043	181.718		121.204	323.305	218.116	136.453	82.9375	6.3482	64.1365	61.0332	82.0714
	411.742	333.635	166.55	136.274	119.018	124.556	23.5051	0.1071	-0.2347	-33.2066	26.2296	34.3087	30.6518	20.5651	3.227	89.1926	38.2908	-8.2653	23.5064	59.1543	73.9426	0.2959	5.4923	63.4209	0.06378	-2.2704		63.5804	40.6161	12.3163	5.4222	216.814		115.237	512.122	103.787	124.96	135.037	44.949	115.332	50.8763	40.3712
	179.976	405.716	-12.6403	12.3342	185.027	48.1977	30.4286	30.4758	-5.0599	-29.0625		45.7564	44.1378	122.834	53.9643	46.6939	37.1314	30.1518	97.7704		42.7398	67.6237	13.8087	57.648	-12.6735		2.1722		33.426	29.6786	11.9758	266.929	-5.2105	117.416	195.751	112.319	342.071	93.102	-8.3023	119.491	160.718
	227.251	131.912	197.52	338.332	80.2066	18.8023	-32.773	22.0612	-26.0255	-7.9694		56.2972	2.3393	34.8903	42.5102	8.2577	6.5191	33.051	-79.5548		109.524	60.6467	70.2245	107.897	3.5306		-20.6441		-34.4477	24.6186		295.06	120.114	178.76	203.297	118.274	152.238	81.9235	-29.6441	61.4401	94.6543
	190.936	178.735	111.532	273.482	105.515	218.231	30.7679	2.023	-25.0969	-18.3546	0.2793	5.0995	-51.3597	77.1097	48.4298	58.8087	34.1556	50.588	64.2462	10.2028	51.0867	11.5459	42.7577	68.1722	7.3278	18.4656	-3.1454	56.5497	47.9337			208.453	244.71	113.852	151.661	131.279	158.99	131.115	113.027	67.4898	72.5689	49.1582
	314.756	104.384	21.648	171.939	15.7474	122.25	14.5663	13.287	-22.8444	38.2908	-32.7717	39.7564	115.543	16.3559	28.4209	10.1531	39.2066	55.4681	48.2296	83.5714	70.648	51.8648	66.6709		-4.6786	-49.6722	0.4796	-67.7054			-1.2474	234.497	158.852	7.8189	391.33	5.6186		119.251	1.4579	96.6939	38.0867	85.7207
	211.469	52.1441	8.5753	132.482	69.4821	134.668	-16.6352	-7.1556	9.2003	43.852	-19.1059	36.2704	7.9005	14.8074	46.5893	3.5651	-3.0893	-7.6492	67.4541	22.4375	74.2653	39.0906	29.801		12.2959	-9.7296	-6.3444	43.7704		17.2513	12.4719	188.057	-72.4732	15.5064	278.836	101.694		3.0497	204.291	57.4923	52.0638	58.9847
	204.055	-3.6684		100.601	94.2436	100.525		17.3048	17.1378	14.639	11.4337	23.0026	9.4196	71.5064	34.5536	59.0765	18.8533	-14.9668	82.0485	25.6441	96.5217	64.7156	32.361	54.4617	-10.3444	20.0102	-2.0395	-5.1033	-80.4056	-11.8916	-0.4107	201.443	84.7296	122.809	206.347	140.079	133.319	-2.2793	71.9298	146.335	50.5472	36.4094
	319.434	289.411		269.454	93.3635	107.712		17.6237	-6.6467	25.25	-45.7079	11.0727	35.4094	72.824	38.1008	-13.5102	27.9898	44.9707	76.4783	0.6327	45.4426	33.5344	30.2691	40.7117	-9.3074	2.0829	-8.8495	-1.8316	-78.3635	-0.4528	116.684		-7.6135	70.8036	261.3	175.358	153.448	64.2934	82.6594	102.862	64.7934	34.9962
	322.619	275.792	261.935	173.247	72.5051	118.464	59.2334		-22.4872	-35.3827	-4.6722	30.0242	49.8112	49.6926	11.5561	60.8673	20.0612	23.2781	43.3878	22.4337	65.5013	67.9936	55.2411	49.0599	-13.6186	20.25	-10.1135	-25.3941	-81.0319	-8.3253	187.307		3.5357	83.6645	180.662	2.125	101.865	36.537	101.814	112.48		25.0485
	207.546	204.084	-1.0982	118.374	84.5957	98.4872	40.8393		-13.2985	11.5179	-33.8622	29.5102	44.5778	29.9069	-1.5077	157.57	47.9464	61.7219	57.3023	83.7462	36.5485	20.2015	-5.1773	23.2806	-7.4056	24.5077	6.0357	-43.1008	-22.8929	-0.8418	200.643	79.3737	-1.1709	169.531	274.282	121.946	78.2768	28.977	55.6186	11.125		44.1913
	241.3	166.496	318.89	135.253	60.2781	72.5166	-3.8661	0.5855	8.9566	-1.9337	7.412		37.0944	69.6607	40	111.064	28.7538	49.1237	8.0421	35.2168	66.2832	22.2653	20.4005	144.264	10.5842	20.9375	29.3329	9.8253	3.1901	-7.6773	108.833	120.096	142.491	110.603	356.802	144.79	74.4311	113.568	7.9222	84.1148	6.227	73.6556
	280.399	140.819	87.5459	291.962	14.9885	53.8469	-38.9885	-34.3852	34.6301	-6.7768	17.4503		44.0459	-13.2258	102.274	15.3087	31.2615	29.9337	17.7768	23.7079	26.6492	58.1633	40.4923	30.9439	-9.926	16.5765	15.0153	31.2755	-36.8329	13.2092	121.326	52.0434	-6.3278	83.4821	168.149	157.37	105.617	134.36	103.319	72.8036	84.7513	52.9719
	120.355	267.037	781.122	60.014	61.7462	115.227	15.6327	-53.861	16.2207	22.6199	15.2589	-33.0536	47.2844	49.6008	-43.8827	44.2946	48.2385	-6.662	35.4821	12.8431	41.7296	33.8648	-135.284	4.162	12.9209	-9.7092	-7.5395	-12.1633	73.0574	14.7602	6.7028	201.065	194.694	119.698	158.139	105.767	127.195	186.4	39.9452	78.6365	1.1084	11.1977
	203.056	156.804	513.823	41.3214	57.5676	95.199	-29.5969	-67.1747	3.4298	5.6952	-0.2972	4.6543	63.0472	42.676	1.2015		34.7309		87.4056	76.4745	128.458	12.5306	40.6952	37.1059	26.713	-21.9681	20.1556	115.677	31.0702	13.1696	79.2117	163.671	147.08	32.2436	184.809	126.282	144.468	80.3814	66.3291	248.398	117.389	70.1365
	219.293	101.662	418.94	206.491	138.149	114.236	29.7283	-26.8878	8.6862	13.8814	-35.7717	29.2347	55.9171	5.1161	9.4643				47.2666	-6.2806	19.3941	4.7181	-130.9	20.1709	8.0204	-17.2041	-7.2283	-45.5485	-19.7666	0.2628	138.67	72.2564	98.9273	52.9898	148.231	142.878	126.786	93.6059	156.819	73.6199	55.3291	120.199
	227.987	125.45	335.324	115.087	109.939	132.43	45.3686	8.588	3.3099	17.2296	23.0383	-13.4388	15.9145	50.162	79.3482	37.4949		67.6276	16.7832	28.9834	60.9056	47.0548	42.5702	12.8355	1.898	-3.0804	-29.0778	-5.6097	28.7219	28.264	229.293	162.908	-1.1569	152.485	235.695	110.291	141.765	44.6964	96.3176	56.6454	78.2781	42.5574
	276.483	405.129	38.4911	33.0064	6.1122	79.1773	32.0472	-16.1939	34.3546	7.074	34.3023	-47.889	51.7156		40.6696	14.4286	-3.6633	19.5319	47.7398	22.0281	9.4349	33.3227	-38.6327	46.0714	-0.08036	-36.6709	17.7972	-69.9094	19.6071	2.2946	94.2041	76.0332	88.1084		142.438	125.639	166.393	136.665	94.9018	73.727	14.7436	131.312
	213.297	238.68	541.917	101.264	115.527	110.528	-32.1008	50.8533	17.7959	22.2602	36.9617	71.0574	53.7844		66.8941	50.8967	82.9107	126.514		54.6173	-1.3661	3.8163	40.9235	19.7092	-3.4273	23.0587	22.2219	-42.1645	22.699	-11.7321	98.3954	59.2347	5.8661		315.232	151.988	106.047	67.0038	108.685	48.926	52.2462	-60.9668
	159.025	176.541	320.633	156.754	153.156	94.2398	-14.852	-16.9171	4.7972	7.7283	48.7921	-36.4783	43.5242	20.9707	138.018	29.4579	-4.3431	-35.0753		18.4286	66.1365	44.2462	26.8342	74.3418	-9.0102	-6.2168	21.3967	25.0051	96.9311	21.6301	27.3048	89.2959	123.149	109.911	198.195	126.027	92.1186	133.037	52.8597	77.7398	43.1505	25.9337
	227.191	55.8304	196.316	100.76	88.3163		40.0791	-35.1186	-41.1263	10.9885	38.4554	-4.9758		50.5434	40.7462	-84.2742	32.7474	51.5931	13.602	4.1135	111.001	28.648	35.8087	38.389	-17.199	13.023	23.5867	-30.2513	16.8571	10.9337	5.3444	124.351	123.466	184.295	525.881	74.4783	104.529	38.1008	15.912	62.0306	34.9133	71.162
	237.147	272.418	264.679	156.612	94.1594		-27.2411	-20.2742	36.5089	12.4541	-11.6288	16.8036		-21.5867	24.7258	53.3661	44.7908	41.7934	22.1977	20.5587	78.6122	36.7819	73.7449	-14.4528	-14.023	-3.9643	-10.8865	34.3253	34.6964	-0.8163	246.162	99.1441	256.917	147.267	272.204	98.2832	102.105	-48.537	144.435	56.6212	64.1747	213.475
	176.046	176.839	34.3316	129.89	184.676		2.2653	17.8941	17.0804	8.1556	42.6059	-18.5497	-25.5804	42.4362	19.5714	59.0944	46.2194	26.7679	27.8865	12.3495	65.8508	65.5281	4.8087	104.394	13.1071	38.3074	6.9821	-11.014	-52.0306	25.4834	132.55	24.4643	93.9911	148.43		135.019	197.577	71.4974	68.3941	95.5918	38.352	124.352
	139.102	207.321	291.306	110.778	138.259		-10.5421	27.6735	25.4617	6.287	-1.8622	-55.7372	64.8839	-13.3061	1.4745	113.096	28.9043	40.8304	11.6403	39.412	59.4222	-16.3967	67.0944	37.5395	16.9503	27.2768	-7.537	24.9821	21.2449	6.2219	161.162	102.402	66.0319	121.642		134.579	108.605	164.247	75.3074	7.1722	58.861	158.907
		159.55	531.95	28.5166	131.189		36.8559	56.514	24.7704	-2.4439	31.088	-44.5357	25.0089	-71.287	61.9069	47.764	-21.5395	120.661	-33.9209	53.3163	49.5753	44.6952	53.361	-0.7028	12.9388	5.0281	44.0293	-21.5944	27.9031	-1.977	-2.1747	97.6939	89.5893	2.4656	150.39	95.9184	141.074	100.682	107.371	42.3329	53.8316	47.7436
		134.75	253.129		71.5408		32.949	-37.2679	27.3036	11.838	-5.588	5.8406	16.7436	-66.0306	46.7781	96.3967	59.4617	-25.3099	29.8814	42.6122	77.5128	64.0344	31.3967	30.287	7.8916	22.088	9.9554	-0.6773	62.713	-11.8699	171.218	125.2	-3.4018	258.528	102.598	217.045	44.1837	178.143	71.0293	44.3367	61.3878	58.4286
	126.915	195.945	233.513		136.628		-1.3584	4.5855	-1.1837	-16.3941	-33.7321	60.2423	-5.6913	41.7283	42.3061	12.0408	17.9732	4.4707	-2.1696	-19.7334	49.8482	24.5906	-31.5434	-6.9477	30.6901	28.949	18.8839	97.0855	17.6352	19.3584	132.819	229.621	107.86	200.256	99.1773	140.745		57.4834	89.7168	168.643	47.662	155.134
	171.33	234.459	210.531	144.117	82.7666		-3.8393	-24.023	11.7717	-11.3967	-30.0306	15.2895	87.0395	86.8941	22.6977	22.0944	12.9337	87.963	33.9298	10.5434	57.8099	5.7997	49.0089		15.9133	17.8508	21.2895	46.9171	84.8814	27.5638	80.6212	97.2946	80.1671	147.31	167.825	120.847		89.8048	84.6747	146.945	64.0408	249.606
	166.688	32.6161	219.704	228.991	6.1173		-48.9018	-2.8597	29.7742	-16.9554	-35.4566	-25.588	36.5638	4.3827	20.6186	27.6059	26.4974	96.5727	-11.4579	39.1365	88.5204	36.1454	83.3355		-1.2538	4.75	12.6339	16.6926	75.3125	32.3495	-12.8992	134.194	117.267	1.8712	384.603	269.528	66.7487	81.0574	60.477	-43.4783	68.0778	40.9477
	61.0179	223.648	204.838	322.249	106.603		-22.2513	40.9171	26.7181	-8.2232	33.2551	86.5408	-10.1977	56.0969	43.2296	-81.7334		91.4834	34.7589	13.1059	111.129	30.227	23.2003	61.1288			6.6097	15.051	-2.3304	37.361	172.263	69.0051	106.79	191.962	216.455	249.607	154.531	104.659	7.6135	173.226	76.7755
	189.371	216.383	309.756	152.367	179.736		-10.3023	36.3508	-7.7806	-24.1696	-2.8036	-26.6314	54.6964	124.13	21.4158	-125.286		82.4541	9.0944	16.7985	37.6913	19.3125	19.4082	42.9592			19.4617	-24.7436	-40.6263	14.5765	232.696	93.1684	251.537	142.38	74.5855	71.9962	239.404	63.4426	67.3253	114.76	64.4821
	94.1301	121.4	655.997	222.17	274.907		13.0115	20.037	16.2653	-29.5395	23.8265	24.3151	155.579	31.1122	11.6556	-104.259		-27.9554	44.9401	17.5995	73.1173	53.4656	65.3814	65.5612	17.7207	30.4286	7.727	-50.9783	26.7628	-20.4643	109.284	90.2628	130.744	161.2	241.997	105.69	88.5357	195.704	104.522	73.2411	50.1403	188.969
	-231.333	71.537	23.7666	144.394	157.57		-38.2385	43.9324	-24.1352	-59.2513	8.5995	14.4566	101.306	-0.236	19.0982	54.4209		99.0651	32.0676	11.9273	92.0714	63.1709	89.9094	40.4069	10.3278	15.5268	11.2321	38.5077	1.8482	1.389	154.531	97.6735	241.212	158.746	116.463	104.523	66.3673	126.978	67.8559	122.829	58.0306	152.19
	216.446	283.056	352.426	147.962	172.426		-17.6441	38.5676	10.6122	-3.8712	32.5383	-8.5395	145.078	42.3801	42.7207	83.8469		34.8635	3.7105	62.7321		38.7066	67.5319	107.138	-36.3661	49.0179		123.847	-60.0587	5.4758	177.735	42.5485	83.375	148.698	55.1939	73.3418	78.324	123.477	13.5931	129.978	52.1033	151.554
	188.344	436.995	67.1161	91.7092	106.783		-3.3495	26.1952	-30.8776	-5.3406	-1.7092	-1.4668	99.5	78.5446		72.2717		77.2143	41.7793	30.8916		72.3852	45.0344	54.537	-19.6722	36.0332		-76.8278	79.199			67.1582		80.6314	91.9069	170.415	213.541	89.8686	94.3954	99.5714		43.7602
	121.714	198.394	245.992	187.716			-19.8571	7.6429	-25.8125	-12.0281	37.6314	9.3125	62.3125	20.3342		82.1964		19.75	-0.5906	27.2487	-10.9107	14.0038	72.1633	73.1173	-20.9426	12.1824	-20.2181	17.7819				129.685		157.249	180.232	152.173	60.5293	94.8087	14.0944	66.8495		10.5574
	161.805	-209.835	282.495	266.661			-43.7883	37.5268	-27.5804	-2.1862	31.4528	-11.6224	112.839	-12.0727	25.6505	25.463		7.3648	24.6492	36.2321	35.9324	45.3788	0.875	27.7245	-10.1492	7.6059	18.2704	0.06888				250.397	-4.7117	9.2066	168.375	283.061	102.288	113.054	12.2921			111.712
	135.662	108.069	11.3138	218.722	218.504		27.4401	42.2857	-30.2181	54.0472	26.5153	-19.3316	114.662	24.6824	18.4503	31.1556		4.8099	0.2117	25.7245	14.7742	35.9707		-31.7883	12.8112	-16.4209	-2.574	-5.4031	11.8291			124.799	99.324	162.917	87.1071	174.855	72.699	74.1633				88.4362
	323.054	105.506		117.14	228.906		-81.2972	27.0217	9.5727	18.9209	9.3559	29.6352	62.9809	62.2793	48.0587	41.3686			33.0115	9.9018	-22.2768			47.1722	-2.4643	29.1161	2.0702		8.5536			95.0969	132.689	198.087	276.327	155.159	37.6837			7.2181		106.786
	176.091	284.49		464.633	226.858		14.9732	56.648	-12.9962	10.1913		2.6556	21.8839	6.8444	4.574	14.227			14.9324	19.9617	9.5587		-1.5217	74.2628	56.3316	17.6033	-0.3712		16.3954			223.423	-6.0625	222.751	121.435	105.395	77.1122			64.9554		18.4643
	354.698	358.119	114.454	65.523	-126.704		13.0421	13.3355	29.7487	24.9171		34.6033	48.1046	38.5931	54.3406	33.7857			-18.5255	51.2755	20.926	11.8176	-18.9923	19.2653	-32.6059	65.3508	-28.2436		6.5344			88.3699	152.592	128.344	119.258	134.179	-2.6314	82.7105		156.663		153.216
	75.2921	158.983	117.264	255.421	195.948		-11.6518	67.5855	-23.6212	-39.7462		-4.3571	23.852	39.2181	12.8329	36.8941			23.9911	14.3036	25.1747	-26.5765	-8.3316	15.7704	-19.7194	32.3622	-34.2474		35.5			132.593	110.121		329.839	100.82	105.932	80.5523		14.9196		68.3788
	149.376	252.626	97.8546	237.402	110.232		34.0434	20.2079	34.6288	22.0778		-23.088	5.6786	-1.9834	25.7959	-114.45			9.514	-5.7628	35.0663	29.6212	41.2385	-14.398	16.4362	101.733	-0.6378		45.7398				3.7577		166.49	98.5625	136.908	39.8495		59.0434		73.7041
	139.769	236.897	330.369	140.101	273.18		-4.8801	13.5268	14.1837	-30.6492		-17.6607	61.7934	37.8099	58.9222	-156.584			44.3878	9.7589	45.3227	-14.1926	57.0587	29.8469	21.8776	10.0497	10.4324		19.2934				123.89	80.6786	390.483	4.5102	55.8087	109.951		36.9426		18.5408
	181.862	279.379	94.3482	207.843	207.372		8.8138	2.5587	5.9235	-10.1875		32.0497	46.5574	24.3878	25.7959	41.2615			19.4949	12.1467	17.9541	18.0957	61.0574	90.2717	10.2474	47.5051	7.8916		54.0395			131.851	87.3648	170.513	140.681	11.1505	242.656	107.519		-33.727		-7.5867
	222.332	119.967	156.251	213.867	336.82		9.2054	49.4554	-11.0599	0.963		26.2602	12.7232	37.6964	69.0676	35.727			-7.2449	8.5599	28.4936	-5.5969	8.889	34.6658	28.4222	54.2181	-17.1582		1.3673			129.393	82.0625	27.1467	137.513	85.5625	105.175	3.2666		53.412		139.839
	119.144	152.9	125.042	159.31	262.307		-20.412	22.1939	-6.4043	12.4043		2.7168	33.4911	34.4783	30.5804	47.361			-22.1071		23.9133	62.4566	10.2628	20.8227	22.1862	50.352	6.1199		-8.5319			109.455	110.64	78.4732	160.717	-5.9809	89.6084	146.296		76.8406
	151.337	349.193	126.2	235.379	209.324		4.2806	19.1811	17.2232	11.3087		32.8163	85.5459	90.0255	38.4796	74.9783			1.3048		-5.264	34.5982	72.0434	66.9732	19.4324	33.963	-10.1008		30.3329			136.645	128.495	172.121	197.321		102.047	13.7156		89.0038
	179.673	220.281	309.667	147.439	314.513		21.611	9.8125	36.2666	8.824			33.0855	30.2372	50.5791	110.406			73.9783	-9.199	58.9758	87.8801	9.9298	-2.4541	22.75	-89.5663	1.5472		34.602			322.069	94.5179	95.5115	92.4082		126.106	67.1135		0.7972
	157.829	153.121	90.9388	77.713	294.263		-11.1671	54.0497	-17.7768				35.6862	57.2232	8.9605	7.8865			43.8814	-3.2092	41.6862	97.8941	73.7666	75.2398	5.3061	-1.0497	12.8546		-5.5663			158.427	116.756	-11.5536	226.957	89.1429	55.736	149.129		43.2245
	152.21	129.853	201.644	125.745	177.672		35.8865		-7.3801			-18.8559	5.0026	57.2066	79.4707	37.5702			25.1837	42.8814	48.8444	110.707	26.2309	55.4209	66.7296	-13.2245	30.7781		-22.9158			8.0523	142.32	211.093	131.541	198.133	62.611	121.057		26.1582
	105.08	293.487	99.7679	203.182	386.816		14.2985		-37.9885	-34.7679		11.8291	25.8444	11.3048	-31.3559	69.2054			20.2653	9.9477	34.2717	35.9375	50.7717		6.0408	-16.5115	9.1709		-30.7245			132.111	3.0459	185.892	95.5765	120.022	34.1798	98.4974		-1.9719
	190.959	177.732	95.486	153.399	150.714			-37.7551	-69.4923	12.7946		6.1148	61.0102	65.1747	-5.8227	52.7411			76.1135	114.759	31.9681	62.8929	98.2487		26.6467	57.6059	-8.5702		-42.2615			188.631	53.727	86.2334	123.296	-27.0357	145.365	194.131		92.1339
	175.262	120.654	155.372	113.811	148.23			30.0026	-13.361	4.7436		-6.1084	17.4694	37.8061	19.7015	46.2589			-39.3941	39.6339	38.9311	69.1837	-40.8176		20.6288	27.6467	0.764		15.5778			188.637	123.054	120.45		208.583	110.542	81.287		46.4796
	193.153	185.494	114.27	243.059	230.246		33.4528	-21.3571	22.7602	-37.8559		-2.75	39.2436	8.1378	-1.4375	57.639			53.2768	44.9031	6.4452	51.6811	90.8061		20.8355		6.8495		4.6429			124.131	2.9298	91.4694		58.1875	61.9337	128.85		131.685
	131.996		101.096	162.034	7.6837		23.773	-21.6849	-27.5804	1.8699		1.2117			26.1378	192.161			31.0625	106.082	22.0548	51.9222	124.855		-10.352		15.2321		32.023			10.7895	204.088	92.676	259.556	168.736	60.7487	70.6773		1.1199
	150.105		110.504	135.523	45.8788		90.1276	8.1518	10.8202	87.5651		-3.1901			-5.3138	60.7207			3.4031	-34.9107	37.4158	44.949	119.233		5.8673		13.2895		-17.3495			113.82	22.2768	139.024	352.018	164.182	52.6059	103.323		47.3533
	109.075	460.094	224.619	118.464	229.584		69.5306	2.1901	27.5115	-13.2857		-83.2934	58.8278	48.0089	33.7679	64.7232			91.4388	65.3036	35.1224	35.5166	25.7908		11.8571		11.912		18.0319			293.238	122.468	122.094	480.422	132.279	119.679	150.625		109.67
	109.719	238.778	9.4936	224.161	157.714		-31.7513	0.8992	14.5944	-11.3176		33.5	-25.0906	1.861	48.5383	77.8087			30.6416	3.5319	10.2628	43.5599	39.8495		-7.8776		30.5306		8.8495			117.07	99.4043	80.5383	176.238	125.853	126.924	59.3622		52.602
	276.82	90.1594	170.661	192.712	137.481		16.3648	-33.3597	16.5727	0.8916		4.6314	59.3903	34.2959	32.8954	47.1097			36.0855	66.2334	40.736	22.8495	18.8214		3.7309		13.2972		-1.9936			112.639	-2.3176	304.921	-0.5179	134.222	176.268	121.934		78.1033
	223.198	236.65	-4.4962	156.439			-66.7959	8.6135		48.9056		10.4515	9.3724	30.4617	-6.4005	89.0957			69.574	10.1046	32.7449	51.6199	-22.0727		-20.5663		-17.0855					94.773	183.338	95.602	1.7474	193.954		57.7577		120.193
	159.262	236.745	110.098	163.482			-15.9311	23.1237		52.0906		54.6352	45.6378	63.1365	9.7538	39.8329			118.213	1.9171	-20.1454	68.6314	-36.9184		4.6454		21.1505					171.143	2.6722	100.145	-16.8227	5.3878		41.2602		85.0765
	127.795	274.918	129.927	172.154			-0.2666	-1.2423	-15.9554	21.7806		2.0765	25.824	7.2589	27.6722	79.7832			72.1901	-65.3304	22.2781	-29.8597	25.4528		1.7462		8.9949					128.412	99.1709	-114.153	168.33	160.013		92.7436		180.219
		253.458	225.343	201.686			-100.033	23.9694	118.736	-3.8941		34.1696	34.7615	35.4362	79.7449				112.499	55.102	8.8584	-9.9298	134.796		13.7921		-35.0281					241.723	175.756	44.5625	274.856	170.938		76.6913		108.652
		397.852	204.023				-50.4962	-16.574	-41.8533	23.9375		30.5523	73.9196	48.9745	28.3878				50.3763	96.1365	-17.6505	67.898	70.3788		15.5395		-4.1786					199.781	10.926	125.201	222.894	96.5077		88.0676		112.694
	71.0804	231.471	18.977				-15.9911	39.3865	43.2883	12.8048		33.4349	24.8202	2.4349	43.912	10.4401			-32.8495	105.073	21.1875	58.1403	29.8546		18.5612		-25.8125					127.621	184.49	12.3125	287.63	144.225		93.227		4.1556
	185.652	260.659	114.274				-28.3099	0.7487	-11.949	2.574		23.4656	-71.9477	7.5765	8.1518	81.2143			48.2245	43.273	40.2742	-3.7934	92.5995		-10.4413		-0.2997					286.584	109.291	138.264	335.388	107.213		10.8571		84.4503
	155.927	-100.552	219.79				-3.3763	-18.9196	-104.451	-2.6148		15.8291	7.8865	7.6263	37.4719	11.3253				73.4426	26.8763	78.6862	94.4311		24.7245		-23.4758					117.386	105.299	121.351	427.362	217.847		108.018		114.469
	40.625	259.686	251.037				17.898	-27.7334	57.8074	-48.3036		23.574	73.1556	39.2602	-5.4962	174.798				49.3112	47.7054	13.3929	115.46		10.4515		-27.0434					-0.3495	-13.3571	121.547	186.936	103.6		56.5357		135.355
	142.694	313.988	176.898				14.824	0.8457	-59.949	-28.2092		-10.6849	51.6454	32.8125	22.5421	50.1633			9.9107	74.5421	17.3878	50.8304	-2.2857		16.5217		9.3776					154.935	153.031	4.2691	277.786	167.62		-77.023		9.4273
	319.185	203.982	61.1288				-25.9349	-0.04719	-122.89	-3.8941		9.1033	32.9566	5.9872	73.5791	46.0778			52.0727	70.3393	30.3418	-2.5242	54.4349		17.4821		4.2232					152.064	-2.9235	167.867	317.236	112		8.5676		25.25
	371.233	195.848	17.5638				31.713	-9.1849	-12.7385	-25.5191		-1.9528	24.963	26.4528	41.0077	-4.486			9.5663	100.79	42.0115	78.273	122.181				-25.3839					26.139	304.213	249.685	256.2	125.292		122.975		200.334
	319.492	455.844	214.968				16.2117	-5.1888	1.1901	-16.1148		-14.648	121.804	-0.5944		93.0204			19.0982	39.9171	32.4554	33.7015	34.1173				-14.7653					110.616		159.305	26.3112	149.32		46.0268		73.4554
	65.5867	-92.6811	215.637				-17.1378	-10.4962	23.5561	-9.9464		-25.1288	98.9094	49.8061		-130.532			19.0676	116.862	-27.8661	46.4209	108.403		1.8304		22.3202					144.798		139.436	-0.005102	109.735		50.2398		50.2755
	220.987	180.177	211.579				0.3916	11.0115	30.1977	-2.037		-27.5791	32.6531	12.0242		49.5548			45.2844	41.0523	38.5166	-9.9043	54.5816		61.8138		14.8712					93.4311			546.228	171.188		113.95		73.3457
	79.338	132.457					43.236	-0.3202	27.6071	1.8227		2.4796	31.6173	63.2015		-328.93			40.6684	39.5153	78.4885	34.5344	37.6926		0.787		24.3801					222.439			-4.1684	110.421		90.6735		68.5268
	-36.7921	145.485					-6.8163	10.8597	13.1314	-29.3648		-33.2143	84.1862	26.2577		11.2321			18.5523	21.5574	45.3278	49.2411	169.173		17.2653		7.9949					166.024				131.601		68.8304		115.499
	421.236	223.871					-11.7742	-20.1658	18.7181	-69.0191		-27.2449	15.5753	29.2602		49.0204			67.8916	29.6161	24.3367	38.1186	47.7462		7.9477		34.7895					121.603				180.519		73.162		50.051
	-136.445	291.19					59.8763	35.5969	25.1531	-31.1531		-31.4209	68.3865	19.9426		192.626			25.2398	82.0383	83.8482	110.193	77.5153		-2.3571		19.6658					81.3814				145.679		77.3712		99.6505
	179.235	85.8176					23.7513	31.9605	-37.1365	3.0612		-6.9298	39.4987	-20.0395		169.26			-78.0064	34.2959	18.3214	25.3112			9.6875		-3.3814					153.847				95.1237		44.9286
	54.8036	637.73					-60.5804	1.9426	-31.7411	-3.1798		11.4337	11.8852	28.4464		120.503			-1.4439	63.3929	48.7372	54.7385			38.477							161.366				170.395		106.686
	-15.7628	140.402					69.9605	14.7232	41.4464	4.2946		-25.6952	34.5459	51.8635		27.9401			9.736	1.361	23.5625	45.1301	19.4974		10.9401							236.355				470.827		68.5115
	83.9541	255.446					45.4452	73.1224	-22.4209	3.6084		-10.5485	22.6429	39.9821		116.358			47.1467	30.5778	28.3559	25.8699	-6.0281		18.0255							164.023				149.733		76.375
	39.6161	182.272					-129.577	-13.926	-39.4719	-1.0944		53.5689	41.9043	51.6441		163.037			15.4515	84.1492	42.8584	61.4171	95.6467		15.7219							135.676				203.503		62.1237
	264.089	138.003					-69.199	26.8406	-16.6071	-3.7092		19.389	6.8304	53.5957		-23.4273			47.4171	37.1556	4.0855	40.4094	-3.977		35.4668											187.871		47.7321
	302.412	368.971					-0.6135	38.1288	55.0051	0.9171		-10.6441	38.5867	24.3444		159.561			70.9464	60.4732		69.852	66.3635		11.6531											134.601
	100.384	184.679					-10.5702	27.0867	-2.0702			-1.6429	36.6454	8.4643		-25.1046			16.1046	61.227		32.6901	42.5523		11.4643											9.2168
	342.288	272.509					63.8546	-34.8967	-19.0038			57.0383	62.6913	46.3355		288.418			49.6735	31.9605		26.463	51.5599		7.7908											-3.3622		59.125
	299.079	252.566					-44.5969	-1.3431	-14.5293	24.7105		-3.9209	-6.2194	44.5077		86.3469			36.6696	49.3903		106.749	82.5714		-0.02423											201.112		63.7806
	369.106	270.652					-148.927	19.0918	-17.6263	-41.6977		-24.2538	10.6033	46.2092		149.272			38.6033			69.6939	38.0829		-0.03316											218.11		104.761
	136.89	144.702					-15.6339	1.3329	-24.6518	47.4362		4.8393	0.9617			74.4528			-22.5714			20.5804	54.7997		24.9554											6.5051		84.2844
	228.071	321.06					-6.449	15.9885	39.4668	83.8087		29.162	17.4643			49.7577			62.0969	11.1901		59.4885	-4.8929		32.8214													21.074
	-5.2538	291.575					4.5191	26.1505	-58.5293	-5.2015		20.023	52.9605			71.3635			15.7615	48.963		63.102	10.0128		3.2742													58.1722
	77.139	360.379					44.0523	27.9974	-4.4936	15.8393		3.5931	21.2296			65.8189			45.2628	30.25			31.0306		12.3048											-13.6148		94.9005
	273.586	266.787					-66.0893		-18.0293	-1.6237		28.9235	-37.4554			94.5625			48.8482	18.5893			-69.2908		19.3852											-1.3878		111.495
		256.131					-22.0523		-2.426	8.1327		-23.3023	36.4043			31.3087			56.5625	18.6696		61.9732	55.5714													-0.1747		79.5306
		444.774					-46.5523		-9.486	43.2015		-9.9617	10.3724			7.2768			38.5842	20.3418		77.0944	-7.9681													77.6582		106.2
	238.029	317.837					106.065		11.4923	15.2997		32.3367	-16.9133			50.0625			82.1059	28.6556		39.1046	90.4388													127.624		130.153
	23.1148	449.952					104.665		23.7717	-49.4809		16.7066	14.2028			15.2895			18.9936	45.4605		74.4362	56.7704													117.282		68.8788
	499.795	167.988					44.2704		-54.5574	35.7602		-9.4298	59.3788			119.987			44.1301	28.3431		85.1658	21.8036													77.9566		84.6786
	95.8852	273.449					74.625		-41.1798	12.9439		-0.3048	-0.2538			55.2883			76.7181	61.1926		19.5293	48.1276													-146.492		134.693
	190.494						-0.5344		12.1033	42.2207		4.6684	53.6773			50.3776			22.6059	48.7003		110.713	50.7321													179.821		53.4477
	263.83						-13.8304		7.6888	-66.9464		51.8737	50.537			-56.9579			102.008	8.7105		58.0319	60.9885													129.898		86.0408
	311.365	262.219					39.8967		16.2066	-20.2781		-23.5293	31.9209			41.9145			38.0191	44.2309		34.486	64.1327													215.27		54.0765
	269.417	152.161					92.8304		18.6276	69.0191		3.8329	15.838			-41.1633			48.7997	38.2143		17.9515	91.5293													149.051		92.1633
	226.17	135.92					20.0281		-32.0548	12.7679		-12.5268	21.8316			-26.9643			23.7653	58.4145		-78.8763	73.9413													184.36		90.3036
	351.513	-113.343					129.506		-52.4018	-28.9605			20.0842			118.614			21.4094	42.6276		42.0804	146.161													106.111		25.3916
	308.126	80.5957							-8.1735	4.9987			23.2997			34.9145			36.5816	44.8278		8.7857	15.0204													110.751		61.0434
	118.278	130.162							-72.4732	73.9554		-47.8355	29.8099			118.584			34.6977	49.9107		71.1033	69.8865													104.147		94.4209
	203.731	89.5791					23.537		13.0242	-13.8941		45.838	41.7538			80.4452			31.6122	28.7411		3.4056	63.148													1.2105		71.963
	245.061	64.8571					-22.824		-2.2283	-6.6798		-11.2997				64.5293			15.4962	42.0702		72.6378	81.0115													141.497		87.1224
	375.801	138.116					-78.1212		-15.1773	-13.2997		-21.7768				73.0804			16.5791			31.6518	-4.088													144.048		49.6122
	126.816	128.355					18.389		-2.4107	-3.7883		-24.8686				65.125			30.2168			44.9311	120.407													127.775		20.5357
	242.545	129.186					36.0459		-20.4694	-20.1875		57.3967				184.773						52.875	80.0676													91.574		83.2181
	289.023	153.361					36.3431		-10.0497	8.6798		9.6186				279.795						148.158	83.3508													81.5944		126.286
	248.23	165.321					1.1582			45.4158		2.3367				116.046			12.5077			68.0485	25.7015													173.755
	299.293	194.756					-10.2398			-25.1811		-0.1378				67.5089			15.0497			65.2997	66.4094													27.1952
	210.782	204.139					20.3724		-2.9375	-40.6429		49.7054				-2.6722			17.7908			214.35	136.931													-0.8992		175.944
	217.249	95.3559					11.7908		16.3023	17.3329		104.668				145.06			31.4222			29.3865	31.0102													101.119		15.8112
	196.167	115.037					20.4043		31.9388	33.7156		47.8967				38.102			5.1684			123.305	-23.2309													131.522		68.0625
	144.577	125.761					19.3253		-10.523	17.7691		7.1901							-1.9056			0.05357	80.0446													161.037		81.8737
	157.763	226.759					33.3457		31.0115	11.8163		6.2691							34.1671			-26.648	23.5485													-2.9834		77.9668
		162.65					22.9056		16.9107	-13.8737		78.4949				-9.1518			25.4452			2.8151	45.3584													193.241		15.9349
		155.9					-47.1582		19.6492	-23.4477		88.9643				-4.3622			21.9885			61.2105	96.4872													155.001		92.8355
		148.606					-15.6735		46.1454	-1.0255		-42.5191				-54.3929			21.3559			92.1582	16.889													172.839		186.731
		154.969					28.6633		-6.4145	-23.0191		-24.5472				-48.9043			13.398			51.8482	103.467													176.01		68.7436
		20.3291					-9.8865		-36.0357	21.6582		80.7219				51.7321			20.0281			175.876	29.7513															120.87
		133.834					-7.2538		36.0408			3.4209				64.2908			25.0867			-2.0319	-38.0893															77.2347
		131.605					2.7474		-71.8597			-27.8278				24.0791			25.9311			74.926	69.3469															93.7895
		89.227					40.8074		-16.1722			-27.2156				-19.8546			26.7832			74.8074	-0.6569															95.4847
		-8.6594					11.7168		22.3482			69.8916				39.5676			46.7436			15.3712	49.7513															47.1684
		137.464					68.8087		54.6901			61.361				34.287			44.8571			-13.0599	0.9503															61.6097
		115.981					31.2717		-14.5944			-70.3265				68.2755			10.0306				90.9554															-11.7334
		240.092					15.8788		-5.3916			28.2296				100.347			15.5957				48.2895															54.361
		6.7156					28.0383		63.287			27.6071				40.9732			51.1837			5.889	43.6518															129.895
		74.0625					2.9962		-21.6288			-137.564				7.0931			42.2679			82.25	77.537															92.4656
		69.4069					-0.8431		-27.926			57.8342				-1.4452			18.6046			12.7385	86.3533															51.9503
		114.296					-16.8763		-41.8648			113.352				5.4898			18.5115			19.0995	58.2666															85.6173
		130.376					-31.4668		-34.1633			31.6059				73.4656			15.7946			44.5102	31.986															89.5128
		165.256					-50.5153		-11.2946			-11.7704				6.8865			34.537			-131.689	55.2513															106.157
		-48.5268					-25.1633		-14.3661			-86.4885				1.7245			20.1122			62.7321	11.0268
		107.594					34.3227		-22.537			64.5727				11.9949			3.463			-52.9388
		128.941					-18.0676		-1.5638			-24.8304				80.4962			32.5434			90.5574
		350.358					-24.8903		-93.1518			78.1365				35.5038			8.898			60.9566
		141.737					-50.787		18.7691			89.6454				53.8253			12.6403			7.8304
		122.659					30.4745		2.5638			118.464				41.0485			5.838			41.3941
		110.769					-19.1199		-9.7385			40.2117				-5.3724			19.6862			25.5026
		203.96					24.2258		-38.2679			31.8189				61.6773			10.6429			55.1263
		107.951					-21.6747		-42.8304			-2.8827				61.463			10.2347			3.9107
		193.54					-42.4286		1.6837			-13.6505				-1.2462			10.5421			48.0829
		210.695					25.5051		14.0816			81.4107				22.8214			27.4388			43.1582
		194.804					20.574		-35.3151			-6.3087				44.0434			17.7462			-75.7577
		337.769					-25.6224		19.9043			-12.8673				46.2347			12.5166			45.6365
		106.509					-58.2895					41.5561				83.8635			1.273			36.0332
		141.596					41.6173					44.0523				12.0727			13.4592			-23.3202
		10.5383					-28.4056									2.8712			-6.301			11.5191
		170.667					21.1505									3.1633			17.7513			-12.1059
		171.602														45.1033			25.3737			-10.9413
		106.643														45.6212			10.0383			27.4413
																-22.6582			23.2143			42.9605
																-15.773			21.2296			61.5434
																47.4872			16.5459			29.5191
																37.2704			-1.9043			-17.0753
																-36.2755			11.4413			8.2959
																17.5727			22.4362			58.1569
																-1.1633						5.4949
																37.0344
																-8.2985
																38.0459
																30.7564
																36.0816
																77.2079
																30.3559
																-29.5306
																75.1403
																75.1722
																-41.5191
																51.4426
																47.0357
																68.1365
																42.8112
																3.1837
																41.3367
																6.5319
																87.6569
																69.6033
																93.9898
																37.8852
																36.8673
																27.8304
																106.029
																48.7347
																66.7232
																89.0944
																45.9056
																41.5319
																20.7105
																31.2666
																23.6492
																-1.4758

## Sheet: anti-M18BP1 
Immunofluorescence intensity of anti-M18BP1	HeLa CENP-A-SNAP
	- siRNA			M18BP1 siRNA
	Experiment 1	Experiment 2	Experiment 3	Experiment 1	Experiment 2	Experiment 3
	-157.158	619.333	259.673	-37.3776	179.162	225.556
	538.681	290.379	1.2105	310.804	80.4158	48.8355
	-45.6671	68.0702	-53.3878	-218.064	161.2	94.412
	453.565	201	97.023	-673.05	98.4898	146.047
	632.961	495.987	401.809	84.1913	129.705	176.883
	211.981	441.032	572.462	-211.775	111.486	483.612
	582.131	482.388	267.528	-110.17	90.6531	-31.1263
	312.393	4.4936	82.4962	-31.1939	149.436	142.525
	893.573	406.846	441.825	139.029	281.976	49.1314
	633.376	551.096	359.151	258.216	-70.5281	146.811
	874.319	327.968	289.628	200.546	86.0931	179.503
	599.4	293.014	114.446	95.6148	61.7577	-60.9911
	406.662	291.17	680.631	69.2462	119.783	37.4324
	853.536	-33.5268	535.725	185.892	-108.524	-67.4923
	492.788	445.361	661.015	253.014	93.6161	60.5217
	694.381	-67.3801	84.7283	-143.983	-82.5128	181.61
	975.009	557.286	348.463	236.638	126.932	17.8355
	946.055	167.67	590.37	43.986	-144.29	28.5625
	-97.8304	511.667	197.333	16.9898	146.494	279.325
	850.13	231.588	278.586	86.4196	327.607	319.307
	1677.07	533.441	-179.04	62.8661	114.588	7.2526
	579.594	101.714	340.976	212.087	100.832	-69.4911
	598.427	402.158	281.542	78.8176	-59.7105	88.4107
	803.559	278.293	-219.629	82.1952	15.5383	235.534
	223.98	-187.732	401.057	201.45	184.032	-31.1084
	545.079	450.594		150.453	175.597	99.7602
	776.448	103.751		100.576	247.023	243.858
	759.236	-41.338	230.601	313.747	110.167	119.807
	313.58	404.964	200.795	160.934	33.1441	-127.978
	670.351	216.142	102.264	385.884	38.0166	-286.571
	23.4439	110.585	213.805	221.643	406.066	60.0663
	1002.86	667.411	48.0753	80.1237	-3.8597	44.2398
	853.105	167.342	190.566	191.347	-34.7819	-12.8099
	523.022	435.631	198.065	-45.7946	85.7959	-44.023
	1554.28	441.065	491.198	-47.4885	35.9082	48.0918
	496.497	546.552	166.028	-181.519	126.246	-52.5204
	411.815	322.385	238.538	-48.6582	102.921	394.199
	703.983	242.61	183.913	-215.036	125.143	-78.426
	672.202	86.4834	303.42	-175.986	21.9566	7.4656
	423.546	454.608	404.904	137.754	-135.904	38.9056
	208.532		430.52	-176.763	-263.713	-1.088
	1023.59		167.384	204.54	90.9439	316.176
	323.254	179.494	119.304	390.006	81.0548	92.1505
	808.198	189.111	368.982	17.6084	129.251	41.5434
	426.709	80.2832	715.142	-287.75	89.7832
	68.0536	-87.074	216.297	45.4758	-5.4745
	572.421	752.041	75.7347	269.202	186.4	-17.7755
	707.482	652.078	108.667	90.8036	-33.699	-158.635
	1238.72	226.911	596.74	243.02	162.991	-193.307
	472.744	490.309	199.45	-46.8724	176.297	197.936
		273.542	485.13	316.8		-23.0255
		791.774	119.735	-41.389		-311.346
	95.3482	-126.725	200.93	108.626	4.1301	49.6543
	882.892	-106.071	816.777	81.3495	95.898	-291.423
	1245.92	568.597	240.878	234.074	20.8048	107.682
	1014.98	589.164	230.608	147.147	331.784	3.4656
	1048.98	691.56	224.397	49.3903	50.5217	211.062
	1441.76	352.291	315.693	341.033	73.1173	-87.6964
	992.321	827.578	26.2372	173.592	-339.254	-41.7347
	912.069	500.129	159.238	140.124	100.138	163.672
	-304.041	362.666	283.064	85.0676	-218.204	211.232
	507.902	383.518	152.762	279.916	57.7985	356.754
	1080.09	767.175	88.6059	-51.2844	95.5051	8.6288
	865.337	124.477	126.87	106.938	328.353	-11.227
	904.884	104.27	308.866	276.434	87.2538	-121.129
	231.67	619.781	498.019	284.18	263.064	-10.7462
	586.48	769.2	371.712		104.033	286.138
	1554.57	530.614	395.112		195.404	-74.9082
	1015.1	547.556	475.741	136.792	336.163	309.274
	1322.81		246.795	322.071	158.649	-47.1276
	580.788			40.412	-28.4439	147.628
	-96.0472	450.884		32.8265	-58.9298	-296.773
	1464.84	349.978	-244.798	90.9898	77.0102	158.352
	362.02	293.503	358.644	266.222	100.295	-231.399
	830.1	532.92	377.588	32.0242	41.2398	175.366
	203.045	395.351	313.824	152.204	-66.1352	-79.3801
	81.338	478.738	449.884	80.3801	-5.6288	70.1071
	1016.8	306.976	402.086	234.203	3.2985	67.5383
	1401	799.078	5.1582	-137.327	159.111	-52.1403
	968.087	235.885	-291.103	188.577	269.163	168.999
	925.054	522.775	402.486	238.339	441.466	341.863
	1362.01	265.043	345.812	188.736	55.5421
	870.909	659.476	246.513	285.106
	975.472	511.375	180.866	32.7704		81.5472
	1113.74	455.677	591.476	132.417	19.8763	61.7436
	467.429	154.994	586.394	192.004	87.4503	110.585
	-83.7156	105.985	438.349	135.853	182.184	-64.9681
	365.997	527.439	168.805	53.7551	282.782	264.527
	118.524	233.522	238.671	-7.8444	260.773	-143.452
	391.866	214.468	304.272	-209.205	44.6339	196.852
	724.675	349.397	48.9413	-53.4133	76.6939	235.978
	787.287	543.237	573.39	289.694	340.249	115.75
	903.638	289.07	360.818	32.3597	109.759	104.486
	1156.65	551.025	697.543	213.259	254.916	73.5957
	558.15	642.329	344.726	-319.599	-7.1237	54.176
	387.363	487.163	523.598	269.036	-103.291	379.101
	278.865	563.7	115.5	-205.216	115.946	357.67
	221.594	51.0944	823.885	170.307	372.545	389.199
	678.289	461.362	82.5702	272.432	171.63	-113.962
	739.366	145.98	527.916	148.034	138.427	56.9898
	867.938	621.513	416.847	-182.679	62.1365	-160.685
	612.039	293.778	353.931	-35.2615	-85.977	80.6926
	824.518	854.722	264.906	106.003	180.721	-86.0702
	910.972	566.832	352.897	4.3227	-32.8724	109.653
	826.44	524.08	115.996	-128.275	155.301	261.144
	637.721		147.284	216.066	-97.5077	172.041
	774.494		168.291	223.066	56.4464	218.525
	753.458	413.438	406.83	-42.7921		-71.6556
	243.513	392.685	554.184	28.1531		133.81
	626.85	182.999		-192.76	193.302	-92.8163
		510.163		306.881	51.3929	240.194
		493.028	26.8189	-23.4235	135.218	40.1556
	1070.44	604.659	-6.5	-112.093	-49.6327	5.1875
	668.768	175.628	377.221	103.26	8.764	-9.2462
	610.707	284.297	530.948	-506.764	-256.334	52.1875
	1471.94	775.403	572.042	76.838	11.6939	167.786
	515.918	617.751	528.841	200.427	-144.464	35.1135
	420.505	224.731	559.982	-54.0829	-34.2921	199.499
	606.564	517.319	673.375	-142.906	213.802	269.764
	474.395	149.592	223.057	-80.6849	-169.101
	381.213	79.9426	275.121	25.713	17.6046
	1239.64	583.253	307.814	210.645	66.1531	-116.264
	708.413	327.246	499.578	199.524	174.981	215.237
	905.065	318.963	25.6135	64.0625	-35.7959	306.189
	558.42	35.9949	328.111	389.069	-51.9617	-77.4247
	1149.49	573.774	910.592	84.7385	-118.136	-140.69
	735.911	494.408	874.312	386.13	198.654	-132.722
	115.004	578.171	605.973	440.712	-79.2015	-67.3431
	670.645	333.412	458.431	-163.421	267.714	210.275
	1007.8	489.836	294.473	367.663	136.18	-27.1161
	234.667	-148.83	291.096	-371.133	17.4043	10.7283
	891.385	384.828	660.371	44.9745	148.38	104.931
	780.175	478.927	215.652	454.2	74.6594	-252.764
	619.365	311.922	589.274	225.134	152.477	185.591
	671.765	879.191	239.02	301.682	272.401	140.832
	337.737	709.855	478.573		-96.7168	196.375
	500.776	164.673	925.025		77.5599	299.783
	290.453	430.441	690.394	-33.1071	-485.319	17.6441
	463.418	581.695	-577.999	3.3954	108.318	235.874
	514.614	919.288	527.647	-237.166	164.996	-54.2015
	557.791	354.314	194.189	97.5434	-45.2564	27.1645
	613.362	246.988	964.246	-88.3176	5.264	200.865
	1724.65	565.306	504.321	-89.4592	66.2883	431.147
	836.888	437.721	752.423	273.792	20.8048	192.923
	599.929		158.815	277.272	103.799	177.51
			345.387	44.4477	208.351	240.189
		595.381	405.406	196.033	30.4579	55.213
	249.519	440.815	370.538	221.615	145.038	102.753
	467.736	467.144	470.87	331.446	-93.2934	44.0344
	-123.784	121.049	444.319	93.023	54.1926	166.103
	569.519	463.418	460.367	-137.158	247.408	2.1288
	654.445	311.529	310.403	127.217	67.9885	26.5357
	272.232	257.471	605	113.02	71.639	384.598
	-60.1403	309.184	449.153	141.309	148.398	91.1901
	671.503	678.504	251.962	9.3431	23.0332	-48.2003
	395.991	1114.57	760.35	-103.383		339.943
	630.612	477.495	854.161	-56.8712		52.6709
	390.68	715.438	50.9821	444.955	293.384	133.731
	716.459	379.483	546.438	40.0383	-77.3801	85.8316
	-554.177	470.375	752.182	-146.466	-81.8393	155.665
	493.792	792.918	564.628	19.0153	107.598	-56.8865
	814.233	490.27	696.332	-27.3763	87.8992	-53.5344
	932.895	12.7372		84.1747	-202.679	170.075
	-220.975	347.092		26.2742	227.758
	604.274	118.834	-16.4605	96.7577	-458.883
	457.278	281.797	134.346	290.496	-48.7844	104.986
	750.545	349.861	542.842	115.175	86.4005	83.8852
	682.182	449.916	618.668	-62.0804	477.43	141.046
	673.338	637.394	242.1	-146.488	240.591	50.8559
	815.617	988.555	-24.0064	-24.1722	118.459	-160.643
	45.8048	475.173	307.041	60.3546	67.9107	164.413
	475.091	407.301	51.4936	131.312	83.1046	60.838
	268.441	317.971	611.26	-72.1071	499.98	331.088
	1408.62		535.258	176.152	-112.163	140.546
	638.783		522.985	171.205	132.747	307.741
	1333.05		162.763	-235.958	256.698	-54.713
	1250.65		670.144	137.768	162.88	68.1429
	348.499		755.2	-42.2156	264.258	275.973
	501.682		482.185	321.11	-158.37	-16.3699
	898.779		578.074	234.355	29.5293	81.1569
	588.629		-477.712	-202.652	-3.801	-178.858
	806.031		427.179	-57.6467	179.7	-6.9222
	683.918		245.607	247.815	389.816	48.7589
	711.167		467.065	-20.9413	238.55	96.7487
	506.274		-413.863	390.041	102.253	27.4477
	925.923		554.875			38.9158
	1132.6		594.144			207.932
	556.777		543.7	72.5778		8.4885
	418.05		483.737	-193.372		179.028
	528.579		483.036	-0.9847		55.2934
	805.267		321.812	-82.6148		-142.585
	665.481		627.996	76.3342		52.949
	721.876		321.312	445.569		146.88
	222.148		285.2	257.784		130.423
	776.593		392.286	-21.3648
	631.385		102.87	-73.0523
	429.751		425.341	123.769
	-366.441		350.39	37.5344
	621.031		346.263	73.0332
	666.202		232.017	56.8737
	813.614		-223.384	25.0561
			98.1429	-207.523
			190.659	49.6173
	272.316		303.807	213.888
	623.164		209.916	220.837
	341.773		267.2	9.7143
	589.028		493.925	172.938
	482.691		526.438	-60.2092
	938.367		71.0804	240.946
	67.4209		511.878	-466.385
	1327.92		489.202	171.994
	565.929		319.821	374.379
	794.277		320.901	49.5638
	24.4477		67.4885	71.7143
	611.441		321.328	-351.496
	75.2219		210.055	13.0497
	1554.48		357.436	339.781
	636.731		260.742	-297.575
	928.742		306.082	126.017
	583.796		558.652	321.177
	1450.98			-61.6518
	482.208			177.24
	807.911			126.911
	239.069			-3.0344
	1049.13			29.3304
	892.069			243.96
	375.393			103.5
	1141.2			280.202
	946.792			68.7321
	714.879			104.898
	332.727			44.8202
	53.6696			87.1824
	494.561			205.536
	900.565			-136.892
	1369.01
	1264.55
	-270.347			-94.0969
	1680.15			7.6645
	898.475			27.588
	949.429			-38.1224
	238.751			248.227
	641.434			-192.681
	1223.76			83.2972
	589.033			201.392
	456.818			-23.0893
	1147.92			372.121
	592.077			-174.02
	1033.72			-228.547
	556.519			-11.125
	1587.44			410.833
				-210.173
				-114.196
				-70.5128
				-268.019
				-47.7857
				-41.4196
				-95.5893
				206.131
				182.782
				-109.356
				-550.756
				298.157
				230.262
				-288.383
				55.0778
				133.774
				36.8737
				77.889
				161.722
				-237.406
				319.485
				383.759
				22.1569
				141.191
				314.853
				181.585
				-88.1441
				182.508
				-59.7615
				-171.355
				144.738
				91.4222
				195.982
				168.962
				77.2385
				14.6926
				416.615
				200.82
				39.2449
				82.3546
				263.887
				30.4566
				-278.974
				-9.9388
				469.506
				367.578
				68.6122
